# Supplementary material for: Expanding the Utilization of Formalin-Fixed, Paraffin-Embedded Archives: Feasibility of miR-Seq for Disease Exploration and Biomarker Development from Biopsies with Clear Cell Renal Cell Carcinoma
Source: Int J Mol Sci. 2018 Mar 9;19(3):803. doi: 10.3390/ijms19030803 (PMC5877664; doi:10.3390/ijms19030803)
Supplement: Supplementary file 1 [file ijms-19-00803-s001.xlsx]

## Sheet: SURVMICRO TCGA ccRCC clinical
Participant Barcode	_PATIENT	_TIME_TO_EVENT	_TIME_TO_EVENT_UNIT	_cohort	_primary_disease	_primary_site	additional_pharmaceutical_therapy	additional_radiation_therapy	additional_surgery_locoregional_procedure	additional_surgery_metastatic_procedure	age_at_initial_pathologic_diagnosis	clinical_M	days_to_additional_surgery_locoregional_procedure	days_to_additional_surgery_metastatic_procedure	days_to_birth	days_to_collection	days_to_death	days_to_initial_pathologic_diagnosis	days_to_last_followup	days_to_new_tumor_event_after_initial_treatment	disease_code	eastern_cancer_oncology_group	erythrocyte_sedimentation_rate_result	followup_case_report_form_submission_reason	followup_treatment_success	form_completion_date	gender	hemoglobin_result	histological_type	history_of_neoadjuvant_treatment	icd_10	icd_o_3_histology	icd_o_3_site	informed_consent_verified	initial_weight	karnofsky_performance_score	lactate_dehydrogenase_result	laterality	lymph_node_examined_count	neoplasm_histologic_grade	new_tumor_event_after_initial_treatment	number_of_lymphnodes_positive	number_pack_years_smoked	oct_embedded	other_dx	pathologic_M	pathologic_N	pathologic_T	pathologic_stage
TCGA-A3-3347	TCGA-A3-3347	1610	days	TCGA Kidney Clear Cell Carcinoma (KIRC)	kidney clear cell carcinoma	Kidney	NO	NO	NO	YES	76			610	-27966		1610	0	1610	610						40433	FEMALE		Kidney Clear Cell Renal Carcinoma	No	C64.9	8310/3	C64.9	YES				Right	1	G2		1		FALSE	No	M0	N1	T1b	Stage III
TCGA-A3-3349	TCGA-A3-3349	1385	days	TCGA Kidney Clear Cell Carcinoma (KIRC)	kidney clear cell carcinoma	Kidney			NO	NO	34				-12431			0	1385							40371	FEMALE		Kidney Clear Cell Renal Carcinoma	No	C64.9	8310/3	C64.9	YES				Left		G2				FALSE	No	M0	N0	T1b	Stage I
TCGA-A3-3351	TCGA-A3-3351	910	days	TCGA Kidney Clear Cell Carcinoma (KIRC)	kidney clear cell carcinoma	Kidney			NO	NO	42				-15562			0	910							40371	MALE		Kidney Clear Cell Renal Carcinoma	No	C64.9	8310/3	C64.9	YES				Right		G2				FALSE	No	M0	N0	T2a	Stage II
TCGA-A3-3357	TCGA-A3-3357	2688	days	TCGA Kidney Clear Cell Carcinoma (KIRC)	kidney clear cell carcinoma	Kidney					62				-22825			0	2688					Scheduled Follow-up Submission	Complete Remission/Response	41394	MALE		Kidney Clear Cell Renal Carcinoma	No	C64.9	8310/3	C64.9	YES				Right		G3	NO			FALSE	No	M0	N0	T2	Stage II
TCGA-A3-3358	TCGA-A3-3358	1307	days	TCGA Kidney Clear Cell Carcinoma (KIRC)	kidney clear cell carcinoma	Kidney					57				-21087			0	1307							40619	FEMALE		Kidney Clear Cell Renal Carcinoma	No	C64.9	8310/3	C64.9	YES				Left		G2				FALSE	Yes	M0	N0	T1a	Stage I
TCGA-A3-3362	TCGA-A3-3362	1559	days	TCGA Kidney Clear Cell Carcinoma (KIRC)	kidney clear cell carcinoma	Kidney			NO	NO	60				-21988			0	1559							40371	FEMALE		Kidney Clear Cell Renal Carcinoma	No	C64.9	8310/3	C64.9	YES				Left		G2				FALSE	No	M0	N0	T1a	Stage I
TCGA-A3-3363	TCGA-A3-3363	319	days	TCGA Kidney Clear Cell Carcinoma (KIRC)	kidney clear cell carcinoma	Kidney					50				-18596			0	319							40309	MALE		Kidney Clear Cell Renal Carcinoma	No	C64.9	8310/3	C64.9	YES				Left		G2				FALSE	No	M0	N0	T2	Stage II
TCGA-A3-3365	TCGA-A3-3365	873	days	TCGA Kidney Clear Cell Carcinoma (KIRC)	kidney clear cell carcinoma	Kidney					46				-16915			0	873							40309	MALE		Kidney Clear Cell Renal Carcinoma	No	C64.9	8310/3	C64.9	YES				Right		G2				FALSE	No	M0	NX	T1a	Stage I
TCGA-A3-3367	TCGA-A3-3367	2270	days	TCGA Kidney Clear Cell Carcinoma (KIRC)	kidney clear cell carcinoma	Kidney					72				-26489			0	2270					Scheduled Follow-up Submission	Complete Remission/Response	41394	MALE		Kidney Clear Cell Renal Carcinoma	No	C64.9	8310/3	C64.9	YES				Left		G3	NO			FALSE	No	M0	N0	T1b	Stage I
TCGA-A3-3370	TCGA-A3-3370	2274	days	TCGA Kidney Clear Cell Carcinoma (KIRC)	kidney clear cell carcinoma	Kidney					48				-17621			0	2274					Scheduled Follow-up Submission	Complete Remission/Response	41394	FEMALE		Kidney Clear Cell Renal Carcinoma	No	C64.9	8310/3	C64.9	YES				Left		G2	NO			FALSE	No	M0	N0	T1b	Stage I
TCGA-A3-3372	TCGA-A3-3372	735	days	TCGA Kidney Clear Cell Carcinoma (KIRC)	kidney clear cell carcinoma	Kidney					64				-23528			0	735							40309	MALE		Kidney Clear Cell Renal Carcinoma	No	C64.9	8310/3	C64.9	YES				Left		G2				FALSE	No	M0	NX	T3	Stage III
TCGA-A3-3373	TCGA-A3-3373	1621	days	TCGA Kidney Clear Cell Carcinoma (KIRC)	kidney clear cell carcinoma	Kidney					54				-19964			0	1621					Scheduled Follow-up Submission	Complete Remission/Response	41394	FEMALE		Kidney Clear Cell Renal Carcinoma	No	C64.9	8310/3	C64.9	YES				Right		G3	NO			FALSE	No	M0	N0	T1b	Stage I
TCGA-A3-3374	TCGA-A3-3374	1314	days	TCGA Kidney Clear Cell Carcinoma (KIRC)	kidney clear cell carcinoma	Kidney					51				-18890			0	1314							40309	FEMALE		Kidney Clear Cell Renal Carcinoma	No	C64.9	8310/3	C64.9	YES				Right		G2				FALSE	No	M0	N0	T1b	Stage I
TCGA-A3-3376	TCGA-A3-3376	1696	days	TCGA Kidney Clear Cell Carcinoma (KIRC)	kidney clear cell carcinoma	Kidney					51				-18954		1696	0	1070					Scheduled Follow-up Submission	Complete Remission/Response	41394	MALE		Kidney Clear Cell Renal Carcinoma	No	C64.9	8310/3	C64.9	YES				Left		G2	NO			FALSE	No	M0	N0	T1a	Stage I
TCGA-A3-3378	TCGA-A3-3378	630	days	TCGA Kidney Clear Cell Carcinoma (KIRC)	kidney clear cell carcinoma	Kidney					60				-22090			0	630							40297	MALE		Kidney Clear Cell Renal Carcinoma	No	C64.9	8310/3	C64.9	YES				Left		G3				FALSE	No	M0	N0	T1	Stage I
TCGA-A3-3380	TCGA-A3-3380	567	days	TCGA Kidney Clear Cell Carcinoma (KIRC)	kidney clear cell carcinoma	Kidney					54				-19828			0	567							40309	MALE		Kidney Clear Cell Renal Carcinoma	No	C64.9	8310/3	C64.9	YES				Left		G2				FALSE	No	M0	N0	T1	Stage I
TCGA-A3-3382	TCGA-A3-3382	574	days	TCGA Kidney Clear Cell Carcinoma (KIRC)	kidney clear cell carcinoma	Kidney			YES		69		560		-25207			0	574	514						40309	MALE		Kidney Clear Cell Renal Carcinoma	No	C64.9	8310/3	C64.9	YES				Left		G3				FALSE	No	M0	NX	T1b	Stage I
TCGA-A3-3383	TCGA-A3-3383	861	days	TCGA Kidney Clear Cell Carcinoma (KIRC)	kidney clear cell carcinoma	Kidney					52				-19324			0	861							40297	MALE		Kidney Clear Cell Renal Carcinoma	No	C64.9	8310/3	C64.9	YES				Left		G2				FALSE	No	M0	NX	T1	Stage I
TCGA-A3-3385	TCGA-A3-3385	1993	days	TCGA Kidney Clear Cell Carcinoma (KIRC)	kidney clear cell carcinoma	Kidney					46				-17114			0	1993					Scheduled Follow-up Submission	Complete Remission/Response	41472	FEMALE		Kidney Clear Cell Renal Carcinoma	No	C64.9	8310/3	C64.9	YES				Left		G2	NO			FALSE	No	M0	N0	T1a	Stage I
TCGA-A3-3387	TCGA-A3-3387	617	days	TCGA Kidney Clear Cell Carcinoma (KIRC)	kidney clear cell carcinoma	Kidney					49				-17920			0	617							40619	MALE		Kidney Clear Cell Renal Carcinoma	No	C64.9	8310/3	C64.9	YES				Left		G2				FALSE	No	M0	N0	T1a	Stage I
TCGA-A3-3346	TCGA-A3-3346	137	days	TCGA Kidney Clear Cell Carcinoma (KIRC)	kidney clear cell carcinoma	Kidney	NO	YES	NO	NO	68				-25118		137	0		114				Scheduled Follow-up Submission	Progressive Disease	41394	MALE		Kidney Clear Cell Renal Carcinoma	No	C64.9	8310/3	C64.9	YES				Left		G3	YES			FALSE	No	M0	NX	T1b	Stage I
TCGA-AK-3425	TCGA-AK-3425	3343	days	TCGA Kidney Clear Cell Carcinoma (KIRC)	kidney clear cell carcinoma	Kidney					68				-24912			0	3343							40592	MALE	Normal	Kidney Clear Cell Renal Carcinoma	No	C64.9	8310/3	C64.9	YES			Normal	Left	6	G2		0		FALSE	Yes	M0	N0	T1	Stage I
TCGA-AK-3426	TCGA-AK-3426	885	days	TCGA Kidney Clear Cell Carcinoma (KIRC)	kidney clear cell carcinoma	Kidney	YES	YES			37				-13770		885	0		256						40492	MALE	Low	Kidney Clear Cell Renal Carcinoma	No	C64.9	8310/3	C64.9	YES		0		Right	10	G3		3		FALSE	No	M0	N1	T3a	Stage III
TCGA-AK-3427	TCGA-AK-3427	3583	days	TCGA Kidney Clear Cell Carcinoma (KIRC)	kidney clear cell carcinoma	Kidney					65				-24067			0	3583					Scheduled Follow-up Submission	Complete Remission/Response	41920	MALE	Normal	Kidney Clear Cell Renal Carcinoma	No	C64.9	8310/3	C64.9	YES				Left	15	GX	NO	15		FALSE	No	M0	N0	T1a	Stage I
TCGA-AK-3428	TCGA-AK-3428	3728	days	TCGA Kidney Clear Cell Carcinoma (KIRC)	kidney clear cell carcinoma	Kidney					62				-22653			0	3728			0		Scheduled Follow-up Submission	Complete Remission/Response	42118	MALE	Low	Kidney Clear Cell Renal Carcinoma	No	C64.9	8310/3	C64.9	YES		100		Left	4	G2	NO	0		FALSE	No	M0	N0	T3b	Stage III
TCGA-AK-3429	TCGA-AK-3429	3328	days	TCGA Kidney Clear Cell Carcinoma (KIRC)	kidney clear cell carcinoma	Kidney					54				-19849			0	3328					Scheduled Follow-up Submission	Complete Remission/Response	41919	FEMALE	Normal	Kidney Clear Cell Renal Carcinoma	No	C64.9	8310/3	C64.9	YES				Right	5	G2	NO	0		FALSE	No	M0	N0	T2	Stage II
TCGA-AK-3430	TCGA-AK-3430	480	days	TCGA Kidney Clear Cell Carcinoma (KIRC)	kidney clear cell carcinoma	Kidney					61				-22612		480	0								40493	MALE	Low	Kidney Clear Cell Renal Carcinoma	No	C64.9	8310/3	C64.9	YES		0		Left	8	G3		3		FALSE	No	M0	N1	T3b	Stage III
TCGA-AK-3431	TCGA-AK-3431	2241	days	TCGA Kidney Clear Cell Carcinoma (KIRC)	kidney clear cell carcinoma	Kidney					62				-22852		2241	0	1853					Scheduled Follow-up Submission	Complete Remission/Response	41919	FEMALE		Kidney Clear Cell Renal Carcinoma	No	C64.9	8310/3	C64.9	YES				Right		G3	NO			FALSE	No	M0	NX	T2	Stage II
TCGA-AK-3433	TCGA-AK-3433	3409	days	TCGA Kidney Clear Cell Carcinoma (KIRC)	kidney clear cell carcinoma	Kidney					48				-17853			0	3409					Scheduled Follow-up Submission	Complete Remission/Response	41919	FEMALE	Normal	Kidney Clear Cell Renal Carcinoma	No	C64.9	8310/3	C64.9	YES				Right	3	GX	NO			FALSE	No	M0	N0	T2	Stage II
TCGA-AK-3434	TCGA-AK-3434	2087	days	TCGA Kidney Clear Cell Carcinoma (KIRC)	kidney clear cell carcinoma	Kidney			YES		72		1640		-26490			0	2087	1640						40494	MALE	Normal	Kidney Clear Cell Renal Carcinoma	No	C64.9	8310/3	C64.9	YES			Normal	Right		G2				FALSE	No	M0	NX	T1b	Stage I
TCGA-AK-3436	TCGA-AK-3436	3331	days	TCGA Kidney Clear Cell Carcinoma (KIRC)	kidney clear cell carcinoma	Kidney	YES	NO	NO	NO	40				-14842			0	3331	1189				Scheduled Follow-up Submission	Stable Disease	41919	MALE	Normal	Kidney Clear Cell Renal Carcinoma	No	C64.9	8310/3	C64.9	YES				Left	22	G2	YES	0		FALSE	No	M1	N0	T2	Stage IV
TCGA-AK-3440	TCGA-AK-3440	2865	days	TCGA Kidney Clear Cell Carcinoma (KIRC)	kidney clear cell carcinoma	Kidney					58				-21337			0	2865					Scheduled Follow-up Submission	Complete Remission/Response	41919	MALE	Low	Kidney Clear Cell Renal Carcinoma	No	C64.9	8310/3	C64.9	YES				Left		G3	NO			FALSE	No	M0	NX	T1a	Stage I
TCGA-AK-3440	TCGA-AK-3440	2865	days	TCGA Kidney Clear Cell Carcinoma (KIRC)	kidney clear cell carcinoma	Kidney					58				-21337			0	2865					Scheduled Follow-up Submission	Complete Remission/Response	41919	MALE	Low	Kidney Clear Cell Renal Carcinoma	No	C64.9	8310/3	C64.9	YES				Left		G3	NO			FALSE	No	M0	NX	T1a	Stage I
TCGA-AK-3443	TCGA-AK-3443	1423	days	TCGA Kidney Clear Cell Carcinoma (KIRC)	kidney clear cell carcinoma	Kidney					45				-16578			0	1423							40345	MALE		Kidney Clear Cell Renal Carcinoma	No	C64.9	8310/3	C64.9	YES				Right	7	GX		0		FALSE	No	M0	N0	T2	Stage II
TCGA-AK-3444	TCGA-AK-3444	1471	days	TCGA Kidney Clear Cell Carcinoma (KIRC)	kidney clear cell carcinoma	Kidney					80				-29497			0	1471							40345	FEMALE		Kidney Clear Cell Renal Carcinoma	No	C64.9	8310/3	C64.9	YES				Left		G2				FALSE	No	M0	NX	T1b	Stage I
TCGA-AK-3445	TCGA-AK-3445	2392	days	TCGA Kidney Clear Cell Carcinoma (KIRC)	kidney clear cell carcinoma	Kidney					69				-25494			0	2392					Scheduled Follow-up Submission	Complete Remission/Response	41919	MALE		Kidney Clear Cell Renal Carcinoma	No	C64.9	8310/3	C64.9	YES				Left		G3	NO		40	FALSE	No	M0	NX	T3a	Stage III
TCGA-AK-3447	TCGA-AK-3447	1217	days	TCGA Kidney Clear Cell Carcinoma (KIRC)	kidney clear cell carcinoma	Kidney					83				-30676			0	1217							40610	MALE	Low	Kidney Clear Cell Renal Carcinoma	No	C64.9	8310/3	C64.9	YES				Left		G2				FALSE	No	M0	NX	T2	Stage II
TCGA-AK-3450	TCGA-AK-3450	1779	days	TCGA Kidney Clear Cell Carcinoma (KIRC)	kidney clear cell carcinoma	Kidney					85				-31364			0	1779					Scheduled Follow-up Submission		41012	FEMALE	Normal	Kidney Clear Cell Renal Carcinoma	No	C64.9	8310/3	C64.9	YES				Right		G2				FALSE	Yes	M0	N0	T1a	Stage I
TCGA-AK-3451	TCGA-AK-3451	2868	days	TCGA Kidney Clear Cell Carcinoma (KIRC)	kidney clear cell carcinoma	Kidney					48				-17859			0	2868					Scheduled Follow-up Submission	Complete Remission/Response	41920	MALE	Normal	Kidney Clear Cell Renal Carcinoma	No	C64.9	8310/3	C64.9	YES				Left	16	G3	NO	0	15	FALSE	No	M0	N0	T2	Stage II
TCGA-AK-3453	TCGA-AK-3453	2531	days	TCGA Kidney Clear Cell Carcinoma (KIRC)	kidney clear cell carcinoma	Kidney					58				-21271			0	2531					Scheduled Follow-up Submission	Complete Remission/Response	41920	FEMALE		Kidney Clear Cell Renal Carcinoma	No	C64.9	8310/3	C64.9	YES				Right		G2	NO			FALSE	No	M0	NX	T2	Stage II
TCGA-AK-3454	TCGA-AK-3454	874	days	TCGA Kidney Clear Cell Carcinoma (KIRC)	kidney clear cell carcinoma	Kidney					84				-30862			0	874							40592	MALE	Low	Kidney Clear Cell Renal Carcinoma	No	C64.9	8310/3	C64.9	YES				Right		G3				FALSE	Yes	M0	NX	T1b	Stage I
TCGA-AK-3455	TCGA-AK-3455	683	days	TCGA Kidney Clear Cell Carcinoma (KIRC)	kidney clear cell carcinoma	Kidney					71				-26221		683	0								40610	FEMALE	Low	Kidney Clear Cell Renal Carcinoma	No	C64.9	8310/3	C64.9	YES				Right		G3				FALSE	Yes	M0	NX	T3b	Stage III
TCGA-AK-3456	TCGA-AK-3456	1143	days	TCGA Kidney Clear Cell Carcinoma (KIRC)	kidney clear cell carcinoma	Kidney					48				-17821			0	1143							40494	MALE	Low	Kidney Clear Cell Renal Carcinoma	No	C64.9	8310/3	C64.9	YES				Right	1	G3		0		FALSE	No	M0	N0	T2	Stage II
TCGA-AK-3458	TCGA-AK-3458	1168	days	TCGA Kidney Clear Cell Carcinoma (KIRC)	kidney clear cell carcinoma	Kidney					48				-17557			0	1168							40583	MALE	Normal	Kidney Clear Cell Renal Carcinoma	No	C64.9	8310/3	C64.9	YES				Right		G3				FALSE	No	M0	NX	T1b	Stage I
TCGA-AK-3460	TCGA-AK-3460	2508	days	TCGA Kidney Clear Cell Carcinoma (KIRC)	kidney clear cell carcinoma	Kidney					58				-21281			0	2508					Scheduled Follow-up Submission	Complete Remission/Response	41920	MALE		Kidney Clear Cell Renal Carcinoma	No	C64.9	8310/3	C64.9	YES				Right		G2	NO			FALSE	No	M0	NX	T1a	Stage I
TCGA-AK-3461	TCGA-AK-3461	2217	days	TCGA Kidney Clear Cell Carcinoma (KIRC)	kidney clear cell carcinoma	Kidney					72				-26464			0	2217					Scheduled Follow-up Submission	Complete Remission/Response	41920	MALE	Normal	Kidney Clear Cell Renal Carcinoma	No	C64.9	8310/3	C64.9	YES				Left		G2	NO			FALSE	No	M0	NX	T1a	Stage I
TCGA-AK-3465	TCGA-AK-3465	369	days	TCGA Kidney Clear Cell Carcinoma (KIRC)	kidney clear cell carcinoma	Kidney					71				-26232			0	369							40345	FEMALE	Normal	Kidney Clear Cell Renal Carcinoma	No	C64.9	8310/3	C64.9	YES				Left		GX				FALSE	No	M0	NX	T1b	Stage I
TCGA-AK-3465	TCGA-AK-3465	369	days	TCGA Kidney Clear Cell Carcinoma (KIRC)	kidney clear cell carcinoma	Kidney					71				-26232			0	369							40345	FEMALE	Normal	Kidney Clear Cell Renal Carcinoma	No	C64.9	8310/3	C64.9	YES				Left		GX				FALSE	No	M0	NX	T1b	Stage I
TCGA-AS-3777	TCGA-AS-3777	1238	days	TCGA Kidney Clear Cell Carcinoma (KIRC)	kidney clear cell carcinoma	Kidney					63				-23039			0	1238					Scheduled Follow-up Submission		41414	MALE	Normal	Kidney Clear Cell Renal Carcinoma	No	C64.9	8310/3	C64.9	YES				Left						FALSE	No	M0	NX	T1a	Stage I
TCGA-B0-4688	TCGA-B0-4688	101	days	TCGA Kidney Clear Cell Carcinoma (KIRC)	kidney clear cell carcinoma	Kidney			NO		46				-16804		101	0						Scheduled Follow-up Submission		40910	MALE	Low	Kidney Clear Cell Renal Carcinoma	No	C64.9	8310/3	C64.9	YES				Left		G4				FALSE	No	M1	N0	T4	Stage IV
TCGA-B0-4690	TCGA-B0-4690	43	days	TCGA Kidney Clear Cell Carcinoma (KIRC)	kidney clear cell carcinoma	Kidney			NO		65				-23985		43	0						Scheduled Follow-up Submission		40910	MALE	Low	Kidney Clear Cell Renal Carcinoma	No	C64.9	8310/3	C64.9	YES				Right	3	G3		0		FALSE	No	M1	N0	T4	Stage IV
TCGA-B0-4691	TCGA-B0-4691	139	days	TCGA Kidney Clear Cell Carcinoma (KIRC)	kidney clear cell carcinoma	Kidney			NO		55				-20176		139	0						Scheduled Follow-up Submission		40910	MALE	Normal	Kidney Clear Cell Renal Carcinoma	No	C64.9	8310/3	C64.9	YES				Left		G3				FALSE	No	M1	N0	T2	Stage IV
TCGA-B0-4693	TCGA-B0-4693	77	days	TCGA Kidney Clear Cell Carcinoma (KIRC)	kidney clear cell carcinoma	Kidney			NO		72				-26659		77	0						Scheduled Follow-up Submission		40912	FEMALE	Low	Kidney Clear Cell Renal Carcinoma	No	C64.9	8310/3	C64.9	YES				Left	5	G4		0		FALSE	No	M0	N0	T3a	Stage III
TCGA-B0-4694	TCGA-B0-4694	106	days	TCGA Kidney Clear Cell Carcinoma (KIRC)	kidney clear cell carcinoma	Kidney			NO		72				-26582		106	0						Scheduled Follow-up Submission		40548	MALE	Low	Kidney Clear Cell Renal Carcinoma	No	C64.9	8310/3	C64.9	YES				Left		G4				FALSE	No	M0	NX	T3b	Stage III
TCGA-B0-4696	TCGA-B0-4696	866	days	TCGA Kidney Clear Cell Carcinoma (KIRC)	kidney clear cell carcinoma	Kidney	YES	NO	YES	YES	58		293	827	-21317		866	0		794				Scheduled Follow-up Submission		40914	MALE	Low	Kidney Clear Cell Renal Carcinoma	No	C64.9	8310/3	C64.9	YES				Left		G3				FALSE	No	M0	N0	T3a	Stage III
TCGA-B0-4697	TCGA-B0-4697	578	days	TCGA Kidney Clear Cell Carcinoma (KIRC)	kidney clear cell carcinoma	Kidney			NO		46				-16844		578	0						Scheduled Follow-up Submission		40914	FEMALE	Low	Kidney Clear Cell Renal Carcinoma	No	C64.9	8310/3	C64.9	YES				Right		G4				FALSE	No	M1	NX	T3b	Stage IV
TCGA-B0-4698	TCGA-B0-4698	42	days	TCGA Kidney Clear Cell Carcinoma (KIRC)	kidney clear cell carcinoma	Kidney			NO		75				-27417		42	0						Scheduled Follow-up Submission		40914	MALE	Low	Kidney Clear Cell Renal Carcinoma	No	C64.9	8310/3	C64.9	YES				Left	6	G4		0		FALSE	No	M0	NX	T4	Stage IV
TCGA-B0-4699	TCGA-B0-4699	110	days	TCGA Kidney Clear Cell Carcinoma (KIRC)	kidney clear cell carcinoma	Kidney					74				-27225		110	0	110					Scheduled Follow-up Submission		40914	MALE	Low	Kidney Clear Cell Renal Carcinoma	No	C64.9	8310/3	C64.9	YES				Right	6	G4		0		FALSE	No	M1	N0	T4	Stage IV
TCGA-B0-4700	TCGA-B0-4700	1980	days	TCGA Kidney Clear Cell Carcinoma (KIRC)	kidney clear cell carcinoma	Kidney					60				-22034		1980	0						Scheduled Follow-up Submission		40914	MALE	Low	Kidney Clear Cell Renal Carcinoma	No	C64.9	8310/3	C64.9	YES				Right		G4				FALSE	No	M1	NX	T4	Stage IV
TCGA-B0-4701	TCGA-B0-4701	238	days	TCGA Kidney Clear Cell Carcinoma (KIRC)	kidney clear cell carcinoma	Kidney					66				-24232		238	0						Scheduled Follow-up Submission		40914	FEMALE	Normal	Kidney Clear Cell Renal Carcinoma	No	C64.9	8310/3	C64.9	YES				Left	1	G3		0		FALSE	No	M1	N0	T3a	Stage IV
TCGA-B0-4703	TCGA-B0-4703	182	days	TCGA Kidney Clear Cell Carcinoma (KIRC)	kidney clear cell carcinoma	Kidney					51				-18921		182	0						Scheduled Follow-up Submission		40914	MALE	Low	Kidney Clear Cell Renal Carcinoma	No	C64.9	8310/3	C64.9	YES				Left		G4				FALSE	No	M1	N0	T3a	Stage IV
TCGA-B0-4706	TCGA-B0-4706	65	days	TCGA Kidney Clear Cell Carcinoma (KIRC)	kidney clear cell carcinoma	Kidney					61				-22331		65	0	26					Scheduled Follow-up Submission		40914	MALE	Low	Kidney Clear Cell Renal Carcinoma	No	C64.9	8310/3	C64.9	YES				Left		G4				FALSE	No	M0	NX	T3a	Stage III
TCGA-B0-4707	TCGA-B0-4707	600	days	TCGA Kidney Clear Cell Carcinoma (KIRC)	kidney clear cell carcinoma	Kidney					63				-23322		600	0						Scheduled Follow-up Submission		40914	MALE	Low	Kidney Clear Cell Renal Carcinoma	No	C64.9	8310/3	C64.9	YES				Left		G4				FALSE	No	M0	NX	T3a	Stage III
TCGA-B0-4710	TCGA-B0-4710	1755	days	TCGA Kidney Clear Cell Carcinoma (KIRC)	kidney clear cell carcinoma	Kidney					75				-27396			0	1755					Scheduled Follow-up Submission	Complete Remission/Response	42089	FEMALE	Low	Kidney Clear Cell Renal Carcinoma	No	C64.9	8310/3	C64.9	YES				Right		G3	NO			FALSE	No	M0	N0	T3a	Stage III
TCGA-B0-4712	TCGA-B0-4712	1337	days	TCGA Kidney Clear Cell Carcinoma (KIRC)	kidney clear cell carcinoma	Kidney					76				-28095		1337	0						Scheduled Follow-up Submission		40922	MALE	Low	Kidney Clear Cell Renal Carcinoma	No	C64.9	8310/3	C64.9	YES				Left		G3				FALSE	Yes	M1	NX	T3a	Stage IV
TCGA-B0-4713	TCGA-B0-4713	202	days	TCGA Kidney Clear Cell Carcinoma (KIRC)	kidney clear cell carcinoma	Kidney					76				-27899		202	0						Scheduled Follow-up Submission		40922	FEMALE	Elevated	Kidney Clear Cell Renal Carcinoma	No	C64.9	8310/3	C64.9	YES				Right		G2				FALSE	No	M0	NX	T3b	Stage III
TCGA-B0-4714	TCGA-B0-4714	99	days	TCGA Kidney Clear Cell Carcinoma (KIRC)	kidney clear cell carcinoma	Kidney					81				-29873		99	0						Scheduled Follow-up Submission		40922	MALE		Kidney Clear Cell Renal Carcinoma	No	C64.9	8310/3	C64.9	YES				Right	1	G3		0		FALSE	No	M1	NX	T3b	Stage IV
TCGA-B0-4718	TCGA-B0-4718	1778	days	TCGA Kidney Clear Cell Carcinoma (KIRC)	kidney clear cell carcinoma	Kidney	YES	NO			57				-20910			0	1778	768				Scheduled Follow-up Submission	Progressive Disease	42089	MALE	Low	Kidney Clear Cell Renal Carcinoma	No	C64.9	8310/3	C64.9	YES				Left		G2	YES			FALSE	No	M0	NX	T3a	Stage III
TCGA-B0-4810	TCGA-B0-4810	478	days	TCGA Kidney Clear Cell Carcinoma (KIRC)	kidney clear cell carcinoma	Kidney	NO	YES		YES	47			238	-17402		478	0		205				Scheduled Follow-up Submission		40926	MALE	Low	Kidney Clear Cell Renal Carcinoma	No	C64.9	8310/3	C64.9	YES				Left	6	G3		2		FALSE	No	M0	N1	T3a	Stage III
TCGA-B0-4811	TCGA-B0-4811	1417	days	TCGA Kidney Clear Cell Carcinoma (KIRC)	kidney clear cell carcinoma	Kidney	YES	YES			48			425	-17792		1417	0		458				Scheduled Follow-up Submission		40927	MALE	Normal	Kidney Clear Cell Renal Carcinoma	No	C64.9	8310/3	C64.9	YES				Left	3	G3		0		FALSE	No	M0	N0	T3a	Stage III
TCGA-B0-4813	TCGA-B0-4813	18	days	TCGA Kidney Clear Cell Carcinoma (KIRC)	kidney clear cell carcinoma	Kidney					68				-25018		18	0	18					Scheduled Follow-up Submission		40927	MALE	Low	Kidney Clear Cell Renal Carcinoma	No	C64.9	8310/3	C64.9	YES				Right		G3				FALSE	No	M0	NX	T3b	Stage III
TCGA-B0-4814	TCGA-B0-4814	168	days	TCGA Kidney Clear Cell Carcinoma (KIRC)	kidney clear cell carcinoma	Kidney					58				-21374		168	0						Scheduled Follow-up Submission		40927	MALE	Low	Kidney Clear Cell Renal Carcinoma	No	C64.9	8310/3	C64.9	YES				Right		G3				FALSE	No	M1	N0	T4	Stage IV
TCGA-B0-4815	TCGA-B0-4815	1588	days	TCGA Kidney Clear Cell Carcinoma (KIRC)	kidney clear cell carcinoma	Kidney					65				-23873		1588	0						Scheduled Follow-up Submission		40927	MALE	Low	Kidney Clear Cell Renal Carcinoma	No	C64.9	8310/3	C64.9	YES				Left		G4				FALSE	No	M0	NX	T3a	Stage III
TCGA-B0-4816	TCGA-B0-4816	1371	days	TCGA Kidney Clear Cell Carcinoma (KIRC)	kidney clear cell carcinoma	Kidney					49				-18133		1371	0						Scheduled Follow-up Submission		40927	MALE	Low	Kidney Clear Cell Renal Carcinoma	No	C64.9	8310/3	C64.9	YES				Left		G3				FALSE	No	M0	N0	T2	Stage II
TCGA-B0-4817	TCGA-B0-4817	1019	days	TCGA Kidney Clear Cell Carcinoma (KIRC)	kidney clear cell carcinoma	Kidney					81				-29873		1019	0						Scheduled Follow-up Submission		38371	MALE	Low	Kidney Clear Cell Renal Carcinoma	No	C64.9	8310/3	C64.9	YES				Right		G3				FALSE	No	M0	N0	T3c	Stage III
TCGA-B0-4818	TCGA-B0-4818	510	days	TCGA Kidney Clear Cell Carcinoma (KIRC)	kidney clear cell carcinoma	Kidney				YES	68			241	-24853		510	0		127				Scheduled Follow-up Submission		40927	FEMALE	Low	Kidney Clear Cell Renal Carcinoma	No	C64.9	8310/3	C64.9	YES				Right		G3				FALSE	No	M0	NX	T2	Stage II
TCGA-B0-4819	TCGA-B0-4819	183	days	TCGA Kidney Clear Cell Carcinoma (KIRC)	kidney clear cell carcinoma	Kidney					60				-22220		183	0	183					Scheduled Follow-up Submission		40927	FEMALE	Normal	Kidney Clear Cell Renal Carcinoma	No	C64.9	8310/3	C64.9	YES				Right		G4				FALSE	No	M1	NX	T3b	Stage IV
TCGA-B0-4821	TCGA-B0-4821	1230	days	TCGA Kidney Clear Cell Carcinoma (KIRC)	kidney clear cell carcinoma	Kidney				NO	68				-25013		1230	0						Scheduled Follow-up Submission		40927	FEMALE	Normal	Kidney Clear Cell Renal Carcinoma	No	C64.9	8310/3	C64.9	YES				Left	1	G3		0		FALSE	No	M0	N0	T3b	Stage III
TCGA-B0-4822	TCGA-B0-4822	1111	days	TCGA Kidney Clear Cell Carcinoma (KIRC)	kidney clear cell carcinoma	Kidney				NO	78				-28774		1111	0						Scheduled Follow-up Submission		40927	MALE	Low	Kidney Clear Cell Renal Carcinoma	No	C64.9	8310/3	C64.9	YES				Right		G4				FALSE	No	M0	NX	T2	Stage II
TCGA-B0-4823	TCGA-B0-4823	454	days	TCGA Kidney Clear Cell Carcinoma (KIRC)	kidney clear cell carcinoma	Kidney					88				-32290		454	0						Scheduled Follow-up Submission		40927	MALE	Low	Kidney Clear Cell Renal Carcinoma	No	C64.9	8310/3	C64.9	YES				Right		G2				FALSE	No	M0	N0	T1a	Stage I
TCGA-B0-4824	TCGA-B0-4824	1657	days	TCGA Kidney Clear Cell Carcinoma (KIRC)	kidney clear cell carcinoma	Kidney					49				-18132		1657	0						Scheduled Follow-up Submission		40927	FEMALE	Low	Kidney Clear Cell Renal Carcinoma	No	C64.9	8310/3	C64.9	YES				Left		G3				FALSE	No	M0	N0	T1a	Stage I
TCGA-B0-4827	TCGA-B0-4827	885	days	TCGA Kidney Clear Cell Carcinoma (KIRC)	kidney clear cell carcinoma	Kidney		YES	NO	YES	77			122	-28467		885	0		668				Scheduled Follow-up Submission		40927	FEMALE	Low	Kidney Clear Cell Renal Carcinoma	No	C64.9	8310/3	C64.9	YES				Left		G4				FALSE	No	M0	N0	T3b	Stage III
TCGA-B0-4828	TCGA-B0-4828	307	days	TCGA Kidney Clear Cell Carcinoma (KIRC)	kidney clear cell carcinoma	Kidney					79				-28948		307	0						Scheduled Follow-up Submission		40928	MALE	Low	Kidney Clear Cell Renal Carcinoma	No	C64.9	8310/3	C64.9	YES				Left		G3				FALSE	No	M1	NX	T2	Stage IV
TCGA-B0-4833	TCGA-B0-4833	2386	days	TCGA Kidney Clear Cell Carcinoma (KIRC)	kidney clear cell carcinoma	Kidney				NO	82				-30190		2386	0						Scheduled Follow-up Submission		40928	FEMALE	Normal	Kidney Clear Cell Renal Carcinoma	No	C64.9	8310/3	C64.9	YES				Left		G2				FALSE	No	M0	N0	T1b	Stage I
TCGA-B0-4834	TCGA-B0-4834	2090	days	TCGA Kidney Clear Cell Carcinoma (KIRC)	kidney clear cell carcinoma	Kidney					49				-18224		2090	0						Scheduled Follow-up Submission		40928	MALE	Low	Kidney Clear Cell Renal Carcinoma	No	C64.9	8310/3	C64.9	YES				Right		G3				FALSE	No	M0	N0	T1a	Stage I
TCGA-B0-4836	TCGA-B0-4836	1238	days	TCGA Kidney Clear Cell Carcinoma (KIRC)	kidney clear cell carcinoma	Kidney				NO	61				-22488		1238	0						Scheduled Follow-up Submission		40928	MALE	Normal	Kidney Clear Cell Renal Carcinoma	No	C64.9	8310/3	C64.9	YES				Right		G3				FALSE	No	M1	NX	T3b	Stage IV
TCGA-B0-4837	TCGA-B0-4837	1378	days	TCGA Kidney Clear Cell Carcinoma (KIRC)	kidney clear cell carcinoma	Kidney	YES			NO	63				-23129		1378	0		1208				Scheduled Follow-up Submission		40928	MALE	Low	Kidney Clear Cell Renal Carcinoma	No	C64.9	8310/3	C64.9	YES				Left		G3				FALSE	No	M0	N0	T1b	Stage I
TCGA-B0-4838	TCGA-B0-4838	834	days	TCGA Kidney Clear Cell Carcinoma (KIRC)	kidney clear cell carcinoma	Kidney					69				-25268		834	0						Scheduled Follow-up Submission		40928	FEMALE	Low	Kidney Clear Cell Renal Carcinoma	No	C64.9	8310/3	C64.9	YES		90		Right		G3				FALSE	No	M0	N0	T1b	Stage I
TCGA-B0-4839	TCGA-B0-4839	1639	days	TCGA Kidney Clear Cell Carcinoma (KIRC)	kidney clear cell carcinoma	Kidney					80				-29380		1639	0						Scheduled Follow-up Submission		40928	FEMALE	Normal	Kidney Clear Cell Renal Carcinoma	No	C64.9	8310/3	C64.9	YES				Left		G2				FALSE	No	M0	N0	T1b	Stage I
TCGA-B0-4841	TCGA-B0-4841	204	days	TCGA Kidney Clear Cell Carcinoma (KIRC)	kidney clear cell carcinoma	Kidney	YES	YES		NO	63				-23097		204	0		108				Scheduled Follow-up Submission		40928	MALE	Low	Kidney Clear Cell Renal Carcinoma	No	C64.9	8310/3	C64.9	YES				Left		G3				FALSE	No	M1	NX	T2	Stage IV
TCGA-B0-4842	TCGA-B0-4842	1724	days	TCGA Kidney Clear Cell Carcinoma (KIRC)	kidney clear cell carcinoma	Kidney	YES	NO	YES		73		250		-27019		1724	0		250				Scheduled Follow-up Submission		40924	FEMALE	Low	Kidney Clear Cell Renal Carcinoma	No	C64.9	8310/3	C64.9	YES				Right		G4				FALSE	No	M0	N0	T3a	Stage III
TCGA-B0-4843	TCGA-B0-4843	320	days	TCGA Kidney Clear Cell Carcinoma (KIRC)	kidney clear cell carcinoma	Kidney			NO		57				-21088		320	0						Scheduled Follow-up Submission		40924	MALE	Normal	Kidney Clear Cell Renal Carcinoma	No	C64.9	8310/3	C64.9	YES				Right		G3				FALSE	No	M0	N0	T3a	Stage III
TCGA-B0-4844	TCGA-B0-4844	313	days	TCGA Kidney Clear Cell Carcinoma (KIRC)	kidney clear cell carcinoma	Kidney		YES			60				-22220		313	0		62				Scheduled Follow-up Submission		40924	MALE	Low	Kidney Clear Cell Renal Carcinoma	No	C64.9	8310/3	C64.9	YES				Left		G3				FALSE	No	M1	NX	T3a	Stage IV
TCGA-B0-4845	TCGA-B0-4845	1986	days	TCGA Kidney Clear Cell Carcinoma (KIRC)	kidney clear cell carcinoma	Kidney	YES	YES			70				-25582		1986	0		748				Scheduled Follow-up Submission		40924	MALE	Low	Kidney Clear Cell Renal Carcinoma	Yes	C64.9	8310/3	C64.9	YES				Right		G2				FALSE	No	M1	NX	T3a	Stage IV
TCGA-B0-4846	TCGA-B0-4846	1200	days	TCGA Kidney Clear Cell Carcinoma (KIRC)	kidney clear cell carcinoma	Kidney		YES			52				-19139		1200	0		163				Scheduled Follow-up Submission		40924	MALE	Normal	Kidney Clear Cell Renal Carcinoma	Yes	C64.9	8310/3	C64.9	YES				Right		G2				FALSE	No	M1	N0	T3a	Stage IV
TCGA-B0-4847	TCGA-B0-4847	793	days	TCGA Kidney Clear Cell Carcinoma (KIRC)	kidney clear cell carcinoma	Kidney					60				-22147		793	0						Scheduled Follow-up Submission		40924	MALE	Low	Kidney Clear Cell Renal Carcinoma	No	C64.9	8310/3	C64.9	YES			Normal	Left		G3				FALSE	No	M1	NX	T3a	Stage IV
TCGA-B0-4848	TCGA-B0-4848	883	days	TCGA Kidney Clear Cell Carcinoma (KIRC)	kidney clear cell carcinoma	Kidney			NO		54				-19892		883	0		494				Scheduled Follow-up Submission		40924	MALE	Low	Kidney Clear Cell Renal Carcinoma	No	C64.9	8310/3	C64.9	YES			Normal	Left		G3				FALSE	No	M0	NX	T3b	Stage III
TCGA-B0-4849	TCGA-B0-4849	69	days	TCGA Kidney Clear Cell Carcinoma (KIRC)	kidney clear cell carcinoma	Kidney			NO		51				-18843		69	0		4				Scheduled Follow-up Submission		40924	MALE	Elevated	Kidney Clear Cell Renal Carcinoma	No	C64.9	8310/3	C64.9	YES				Left		G3				FALSE	No	M0	NX	T3a	Stage III
TCGA-B0-4852	TCGA-B0-4852	1121	days	TCGA Kidney Clear Cell Carcinoma (KIRC)	kidney clear cell carcinoma	Kidney			NO	YES	78			860	-28552		1121	0		860				Scheduled Follow-up Submission		40924	FEMALE	Low	Kidney Clear Cell Renal Carcinoma	No	C64.9	8310/3	C64.9	YES				Left		G2				FALSE	No	M0	N0	T2	Stage II
TCGA-B0-4945	TCGA-B0-4945	2145	days	TCGA Kidney Clear Cell Carcinoma (KIRC)	kidney clear cell carcinoma	Kidney					75				-27523		2145	0						Scheduled Follow-up Submission		40928	FEMALE	Elevated	Kidney Clear Cell Renal Carcinoma	No	C64.9	8310/3	C64.9	YES				Right		G2				FALSE	No	M0	N0	T1a	Stage I
TCGA-B0-5075	TCGA-B0-5075	637	days	TCGA Kidney Clear Cell Carcinoma (KIRC)	kidney clear cell carcinoma	Kidney					77				-28205		637	0						Scheduled Follow-up Submission		40928	FEMALE	Normal	Kidney Clear Cell Renal Carcinoma	No	C64.9	8310/3	C64.9	YES				Left		G2				FALSE	No	M0	N0	T3a	Stage III
TCGA-B0-5077	TCGA-B0-5077	1317	days	TCGA Kidney Clear Cell Carcinoma (KIRC)	kidney clear cell carcinoma	Kidney					77				-28405		1317	0						Scheduled Follow-up Submission		40928	MALE	Normal	Kidney Clear Cell Renal Carcinoma	No	C64.9	8310/3	C64.9	YES				Left		G3				FALSE	No	M0	N0	T1a	Stage I
TCGA-B0-5080	TCGA-B0-5080	342	days	TCGA Kidney Clear Cell Carcinoma (KIRC)	kidney clear cell carcinoma	Kidney	YES	YES			63				-23052		342	0		103				Scheduled Follow-up Submission		40928	MALE	Normal	Kidney Clear Cell Renal Carcinoma	No	C64.9	8310/3	C64.9	YES				Right		G3				FALSE	No	M1	N0	T3a	Stage IV
TCGA-B0-5081	TCGA-B0-5081	362	days	TCGA Kidney Clear Cell Carcinoma (KIRC)	kidney clear cell carcinoma	Kidney		YES		NO	79				-29219		362	0		213				Scheduled Follow-up Submission		40928	FEMALE	Low	Kidney Clear Cell Renal Carcinoma	No	C64.9	8310/3	C64.9	YES				Right		G2				FALSE	No	M0	N0	T3b	Stage III
TCGA-B0-5083	TCGA-B0-5083	1045	days	TCGA Kidney Clear Cell Carcinoma (KIRC)	kidney clear cell carcinoma	Kidney					63				-23034		1045	0						Scheduled Follow-up Submission		40929	MALE	Low	Kidney Clear Cell Renal Carcinoma	No	C64.9	8310/3	C64.9	YES				Left		G3				FALSE	No	M0	N0	T1a	Stage I
TCGA-B0-5084	TCGA-B0-5084	222	days	TCGA Kidney Clear Cell Carcinoma (KIRC)	kidney clear cell carcinoma	Kidney	YES			NO	33				-12219		222	0		65				Scheduled Follow-up Submission		40929	MALE	Normal	Kidney Clear Cell Renal Carcinoma	No	C64.9	8310/3	C64.9	YES				Right	1	G3		1		FALSE	No	M1	N1	T3a	Stage IV
TCGA-B0-5085	TCGA-B0-5085	770	days	TCGA Kidney Clear Cell Carcinoma (KIRC)	kidney clear cell carcinoma	Kidney					76				-27793		770	0						Scheduled Follow-up Submission		40929	FEMALE	Low	Kidney Clear Cell Renal Carcinoma	No	C64.9	8310/3	C64.9	YES				Left		G3				FALSE	No	M0	N0	T3a	Stage III
TCGA-B0-5088	TCGA-B0-5088	563	days	TCGA Kidney Clear Cell Carcinoma (KIRC)	kidney clear cell carcinoma	Kidney				NO	53				-19677		563	0						Scheduled Follow-up Submission		40929	MALE	Normal	Kidney Clear Cell Renal Carcinoma	No	C64.9	8310/3	C64.9	YES				Right		G3				FALSE	Yes	M0	N0	T1b	Stage I
TCGA-B0-5092	TCGA-B0-5092	459	days	TCGA Kidney Clear Cell Carcinoma (KIRC)	kidney clear cell carcinoma	Kidney					53				-19611		459	0								41033	FEMALE	Normal	Kidney Clear Cell Renal Carcinoma	No	C64.9	8310/3	C64.9	YES				Left		G3				FALSE	No	M1	N0	T1a	Stage IV
TCGA-B0-5094	TCGA-B0-5094	333	days	TCGA Kidney Clear Cell Carcinoma (KIRC)	kidney clear cell carcinoma	Kidney	YES	YES	NO	NO	62				-22965		333	0		75						41033	MALE	Low	Kidney Clear Cell Renal Carcinoma	No	C64.9	8310/3	C64.9	YES				Left		G2				FALSE	No	M1	N0	T3b	Stage IV
TCGA-B0-5095	TCGA-B0-5095	245	days	TCGA Kidney Clear Cell Carcinoma (KIRC)	kidney clear cell carcinoma	Kidney					81				-29921		245	0						Scheduled Follow-up Submission		41033	MALE	Low	Kidney Clear Cell Renal Carcinoma	No	C64.9	8310/3	C64.9	YES				Right		G3				FALSE	No	M0	N0	T3a	Stage III
TCGA-B0-5096	TCGA-B0-5096	68	days	TCGA Kidney Clear Cell Carcinoma (KIRC)	kidney clear cell carcinoma	Kidney					72				-26574		68	0								41033	FEMALE	Normal	Kidney Clear Cell Renal Carcinoma	No	C64.9	8310/3	C64.9	YES				Left	1	GX		1		FALSE	No	M0	N1	T3a	Stage III
TCGA-B0-5097	TCGA-B0-5097	665	days	TCGA Kidney Clear Cell Carcinoma (KIRC)	kidney clear cell carcinoma	Kidney	NO	YES	NO	YES	59			359	-21852			0	665	359				Scheduled Follow-up Submission		41033	FEMALE	Normal	Kidney Clear Cell Renal Carcinoma	No	C64.9	8310/3	C64.9	YES				Right	2	G2				FALSE	No	M0	N0	T3b	Stage III
TCGA-B0-5098	TCGA-B0-5098	1584	days	TCGA Kidney Clear Cell Carcinoma (KIRC)	kidney clear cell carcinoma	Kidney					53				-19620		1584	0								41036	FEMALE	Normal	Kidney Clear Cell Renal Carcinoma	No	C64.9	8310/3	C64.9	YES				Right		G3				FALSE	No	M0	NX	T1	Stage I
TCGA-B0-5099	TCGA-B0-5099	485	days	TCGA Kidney Clear Cell Carcinoma (KIRC)	kidney clear cell carcinoma	Kidney					88				-32364		485	0								41036	FEMALE	Low	Kidney Clear Cell Renal Carcinoma	No	C64.9	8310/3	C64.9	YES				Right		G3				FALSE	No	M0	NX	T3b	Stage III
TCGA-B0-5100	TCGA-B0-5100	1913	days	TCGA Kidney Clear Cell Carcinoma (KIRC)	kidney clear cell carcinoma	Kidney	NO	NO	NO	NO	72				-26478		1913	0		1426						41036	MALE	Low	Kidney Clear Cell Renal Carcinoma	No	C64.9	8310/3	C64.9	YES				Right		G3				FALSE	No	M0	NX	T3a	Stage III
TCGA-B0-5102	TCGA-B0-5102	2764	days	TCGA Kidney Clear Cell Carcinoma (KIRC)	kidney clear cell carcinoma	Kidney	NO	NO	YES	NO	74		2764		-27152		2764	0		2734						41036	FEMALE	Normal	Kidney Clear Cell Renal Carcinoma	No	C64.9	8310/3	C64.9	YES				Left		G3				FALSE	No	M0	NX	T1	Stage I
TCGA-B0-5104	TCGA-B0-5104	2752	days	TCGA Kidney Clear Cell Carcinoma (KIRC)	kidney clear cell carcinoma	Kidney					90				-32873		2752	0								41036	FEMALE	Low	Kidney Clear Cell Renal Carcinoma	No	C64.9	8310/3	C64.9	YES				Left		G2				FALSE	No	M0	N0	T1	Stage I
TCGA-B0-5106	TCGA-B0-5106	1598	days	TCGA Kidney Clear Cell Carcinoma (KIRC)	kidney clear cell carcinoma	Kidney					64				-23547		1598	0								41036	MALE	Low	Kidney Clear Cell Renal Carcinoma	No	C64.9	8310/3	C64.9	YES				Left		G2				FALSE	No	M0	N0	T1a	Stage I
TCGA-B0-5107	TCGA-B0-5107	927	days	TCGA Kidney Clear Cell Carcinoma (KIRC)	kidney clear cell carcinoma	Kidney	YES	YES	NO	NO	65				-23929		927	0		549						41036	FEMALE	Low	Kidney Clear Cell Renal Carcinoma	No	C64.9	8310/3	C64.9	YES				Right		G4				FALSE	No	M1	N0	T2	Stage IV
TCGA-B0-5108	TCGA-B0-5108	1782	days	TCGA Kidney Clear Cell Carcinoma (KIRC)	kidney clear cell carcinoma	Kidney					54				-19932			0	1782					Scheduled Follow-up Submission	Complete Remission/Response	42088	MALE	Low	Kidney Clear Cell Renal Carcinoma	No	C64.9	8310/3	C64.9	YES				Left		G2	NO			FALSE	No	M0	N0	T3a	Stage III
TCGA-B0-5109	TCGA-B0-5109	587	days	TCGA Kidney Clear Cell Carcinoma (KIRC)	kidney clear cell carcinoma	Kidney	NO	NO	YES		69		100		-25428		587	0		70						41036	MALE	Low	Kidney Clear Cell Renal Carcinoma	No	C64.9	8310/3	C64.9	YES				Left	1	G4		1		FALSE	No	M0	N1	T3b	Stage III
TCGA-B0-5110	TCGA-B0-5110	2009	days	TCGA Kidney Clear Cell Carcinoma (KIRC)	kidney clear cell carcinoma	Kidney					71				-25976			0	2009					Scheduled Follow-up Submission	Complete Remission/Response	42088	FEMALE	Normal	Kidney Clear Cell Renal Carcinoma	No	C64.9	8310/3	C64.9	YES				Right		G2	NO			FALSE	No	M0	N0	T1a	Stage I
TCGA-B0-5113	TCGA-B0-5113	1175	days	TCGA Kidney Clear Cell Carcinoma (KIRC)	kidney clear cell carcinoma	Kidney					69				-25369			0	1175					Scheduled Follow-up Submission	Complete Remission/Response	42088	FEMALE	Low	Kidney Clear Cell Renal Carcinoma	No	C64.9	8310/3	C64.9	YES				Right	3	G2	NO	0		FALSE	No	M0	N0	T3a	Stage III
TCGA-B0-5115	TCGA-B0-5115	1604	days	TCGA Kidney Clear Cell Carcinoma (KIRC)	kidney clear cell carcinoma	Kidney					43				-15935			0	1604					Scheduled Follow-up Submission	Progressive Disease	42089	MALE	Normal	Kidney Clear Cell Renal Carcinoma	No	C64.9	8310/3	C64.9	YES				Left		G3	NO			FALSE	No	M1	N0	T2	Stage IV
TCGA-B0-5116	TCGA-B0-5116	1274	days	TCGA Kidney Clear Cell Carcinoma (KIRC)	kidney clear cell carcinoma	Kidney	NO	YES			52				-19352			0	1274	1129				Scheduled Follow-up Submission	Partial Remission/Response	42089	MALE	Normal	Kidney Clear Cell Renal Carcinoma	No	C64.9	8310/3	C64.9	YES				Right		G3	YES			FALSE	No	M0	N0	T3b	Stage III
TCGA-B0-5117	TCGA-B0-5117	1608	days	TCGA Kidney Clear Cell Carcinoma (KIRC)	kidney clear cell carcinoma	Kidney					40				-14612			0	1608					Scheduled Follow-up Submission	Complete Remission/Response	42089	MALE	Normal	Kidney Clear Cell Renal Carcinoma	No	C64.9	8310/3	C64.9	YES				Right		G2	NO			FALSE	No	M0	NX	T1b	Stage I
TCGA-B0-5119	TCGA-B0-5119	1552	days	TCGA Kidney Clear Cell Carcinoma (KIRC)	kidney clear cell carcinoma	Kidney					61				-22607			0	1552					Scheduled Follow-up Submission	Complete Remission/Response	42084	FEMALE	Normal	Kidney Clear Cell Renal Carcinoma	No	C64.9	8310/3	C64.9	YES				Right		G2	NO			FALSE	No	M0	N0	T1b	Stage I
TCGA-B0-5120	TCGA-B0-5120	1169	days	TCGA Kidney Clear Cell Carcinoma (KIRC)	kidney clear cell carcinoma	Kidney					72				-26559			0	1169					Scheduled Follow-up Submission	Complete Remission/Response	42089	FEMALE	Normal	Kidney Clear Cell Renal Carcinoma	No	C64.9	8310/3	C64.9	YES				Left		G2	NO			FALSE	No	M0	N0	T1a	Stage I
TCGA-A3-3307	TCGA-A3-3307	1436	days	TCGA Kidney Clear Cell Carcinoma (KIRC)	kidney clear cell carcinoma	Kidney					66				-24315			0	1436							40281	MALE		Kidney Clear Cell Renal Carcinoma	No	C64.9	8310/3	C64.9	YES				Right	4	G3				FALSE	Yes	M0	N0	T3b	Stage III
TCGA-A3-3308	TCGA-A3-3308	16	days	TCGA Kidney Clear Cell Carcinoma (KIRC)	kidney clear cell carcinoma	Kidney					77				-28287			0	16							40280	FEMALE	Normal	Kidney Clear Cell Renal Carcinoma	No	C64.9	8310/3	C64.9	YES				Right		G2				FALSE	No	M0	N0	T3b	Stage III
TCGA-A3-3311	TCGA-A3-3311	1191	days	TCGA Kidney Clear Cell Carcinoma (KIRC)	kidney clear cell carcinoma	Kidney					57				-21183		1191	0								40309	MALE	Low	Kidney Clear Cell Renal Carcinoma	No	C64.9	8310/3	C64.9	YES				Right		G2				FALSE	No	M0	NX	T1	Stage I
TCGA-A3-3313	TCGA-A3-3313	735	days	TCGA Kidney Clear Cell Carcinoma (KIRC)	kidney clear cell carcinoma	Kidney					59				-21556		735	0	735							40309	MALE	Low	Kidney Clear Cell Renal Carcinoma	No	C64.9	8310/3	C64.9	YES				Right		G3				FALSE	No	M0	N0	T1b	Stage I
TCGA-A3-3316	TCGA-A3-3316	1493	days	TCGA Kidney Clear Cell Carcinoma (KIRC)	kidney clear cell carcinoma	Kidney					57				-20931			0	1493							40309	MALE		Kidney Clear Cell Renal Carcinoma	No	C64.9	8310/3	C64.9	YES				Left		G3				FALSE	No	M0	NX	T2	Stage II
TCGA-A3-3317	TCGA-A3-3317	1491	days	TCGA Kidney Clear Cell Carcinoma (KIRC)	kidney clear cell carcinoma	Kidney			YES	YES	67			952	-24803			0	1491	952						40290	MALE		Kidney Clear Cell Renal Carcinoma	No	C64.9	8310/3	C64.9	YES				Left		G2				FALSE	No	M0	N0	T2	Stage II
TCGA-A3-3317	TCGA-A3-3317	1491	days	TCGA Kidney Clear Cell Carcinoma (KIRC)	kidney clear cell carcinoma	Kidney			YES	YES	67			952	-24803			0	1491	952						40290	MALE		Kidney Clear Cell Renal Carcinoma	No	C64.9	8310/3	C64.9	YES				Left		G2				FALSE	No	M0	N0	T2	Stage II
TCGA-A3-3319	TCGA-A3-3319	1130	days	TCGA Kidney Clear Cell Carcinoma (KIRC)	kidney clear cell carcinoma	Kidney					70				-25699			0	1130							40309	MALE		Kidney Clear Cell Renal Carcinoma	No	C64.9	8310/3	C64.9	YES				Left		G2				FALSE	No	M0	NX	T1b	Stage I
TCGA-A3-3320	TCGA-A3-3320	1508	days	TCGA Kidney Clear Cell Carcinoma (KIRC)	kidney clear cell carcinoma	Kidney					52				-19138			0	1508							40309	FEMALE		Kidney Clear Cell Renal Carcinoma	No	C64.9	8310/3	C64.9	YES				Right		G1				FALSE	No	M0	NX	T1b	Stage I
TCGA-A3-3322	TCGA-A3-3322	1478	days	TCGA Kidney Clear Cell Carcinoma (KIRC)	kidney clear cell carcinoma	Kidney					51				-18754			0	1478							40309	MALE		Kidney Clear Cell Renal Carcinoma	No	C64.9	8310/3	C64.9	YES				Left		G2				FALSE	No	M0	NX	T1a	Stage I
TCGA-A3-3323	TCGA-A3-3323	1106	days	TCGA Kidney Clear Cell Carcinoma (KIRC)	kidney clear cell carcinoma	Kidney					53				-19456			0	1106							40288	MALE		Kidney Clear Cell Renal Carcinoma	No	C64.9	8310/3	C64.9	YES				Right		G1				FALSE	No	M0	NX	T1b	Stage I
TCGA-A3-3324	TCGA-A3-3324	1186	days	TCGA Kidney Clear Cell Carcinoma (KIRC)	kidney clear cell carcinoma	Kidney					51				-18843			0	1186							40309	MALE		Kidney Clear Cell Renal Carcinoma	No	C64.9	8310/3	C64.9	YES				Right		G3				FALSE	No	M0	NX	T1b	Stage I
TCGA-A3-3326	TCGA-A3-3326	1137	days	TCGA Kidney Clear Cell Carcinoma (KIRC)	kidney clear cell carcinoma	Kidney					47				-17285			0	1137							40309	MALE		Kidney Clear Cell Renal Carcinoma	No	C64.9	8310/3	C64.9	YES				Right		G1				FALSE	No	M0	NX	T1a	Stage I
TCGA-A3-3331	TCGA-A3-3331	1485	days	TCGA Kidney Clear Cell Carcinoma (KIRC)	kidney clear cell carcinoma	Kidney					86				-31615			0	1485							40297	FEMALE		Kidney Clear Cell Renal Carcinoma	No	C64.9	8310/3	C64.9	YES				Right		G2				FALSE	No	M0	N0	T1	Stage I
TCGA-B0-5121	TCGA-B0-5121	1485	days	TCGA Kidney Clear Cell Carcinoma (KIRC)	kidney clear cell carcinoma	Kidney					56				-20635			0	1485					Scheduled Follow-up Submission	Complete Remission/Response	42086	MALE	Low	Kidney Clear Cell Renal Carcinoma	No	C64.9	8310/3	C64.9	YES				Right		G2	NO			FALSE	No	M0	N0	T1b	Stage I
TCGA-B0-5399	TCGA-B0-5399	1411	days	TCGA Kidney Clear Cell Carcinoma (KIRC)	kidney clear cell carcinoma	Kidney					46				-17145			0	1411					Scheduled Follow-up Submission	Complete Remission/Response	42086	MALE	Low	Kidney Clear Cell Renal Carcinoma	No	C64.9	8310/3	C64.9	YES				Right		G2	NO			FALSE	No	M0	N0	T1b	Stage I
TCGA-B0-5400	TCGA-B0-5400	1733	days	TCGA Kidney Clear Cell Carcinoma (KIRC)	kidney clear cell carcinoma	Kidney					59				-21819			0	1733					Scheduled Follow-up Submission	Complete Remission/Response	42087	FEMALE	Low	Kidney Clear Cell Renal Carcinoma	No	C64.9	8310/3	C64.9	YES				Right		G4	NO			FALSE	No	M0	N0	T3b	Stage III
TCGA-B0-5402	TCGA-B0-5402	1290	days	TCGA Kidney Clear Cell Carcinoma (KIRC)	kidney clear cell carcinoma	Kidney	NO	YES			64				-23477			0	1290	449				Scheduled Follow-up Submission	Progressive Disease	42087	MALE	Low	Kidney Clear Cell Renal Carcinoma	No	C64.9	8310/3	C64.9	YES				Left		G4	YES			FALSE	No	M0	NX	T4	Stage IV
TCGA-B0-5690	TCGA-B0-5690	3392	days	TCGA Kidney Clear Cell Carcinoma (KIRC)	kidney clear cell carcinoma	Kidney					53				-19685			0	3392					Scheduled Follow-up Submission	Complete Remission/Response	42087	FEMALE	Normal	Kidney Clear Cell Renal Carcinoma	No	C64.9	8310/3	C64.9	YES				Right		G1	NO			FALSE	No	M0	NX	T1b	Stage I
TCGA-B0-5691	TCGA-B0-5691	3431	days	TCGA Kidney Clear Cell Carcinoma (KIRC)	kidney clear cell carcinoma	Kidney	YES	YES	NO		66				-24120			0	3431	3250				Scheduled Follow-up Submission		41038	FEMALE	Low	Kidney Clear Cell Renal Carcinoma	No	C64.9	8310/3	C64.9	YES				Left		G3				FALSE	Yes	M0	N0	T1a	Stage I
TCGA-B0-5692	TCGA-B0-5692	3944	days	TCGA Kidney Clear Cell Carcinoma (KIRC)	kidney clear cell carcinoma	Kidney					66				-24140			0	3944					Scheduled Follow-up Submission	Complete Remission/Response	42084	FEMALE	Normal	Kidney Clear Cell Renal Carcinoma	No	C64.9	8310/3	C64.9	YES				Right		G3	NO			FALSE	No	M0	N0	T3b	Stage III
TCGA-B0-5693	TCGA-B0-5693	4074	days	TCGA Kidney Clear Cell Carcinoma (KIRC)	kidney clear cell carcinoma	Kidney					47				-17177			0	4074					Scheduled Follow-up Submission	Complete Remission/Response	42087	FEMALE	Normal	Kidney Clear Cell Renal Carcinoma	No	C64.9	8310/3	C64.9	YES				Right		G2	NO			FALSE	Yes	M0	NX	T1b	Stage I
TCGA-B0-5694	TCGA-B0-5694	480	days	TCGA Kidney Clear Cell Carcinoma (KIRC)	kidney clear cell carcinoma	Kidney	YES	YES	NO	NO	71				-26060		480	0		288				Scheduled Follow-up Submission		41039	MALE	Low	Kidney Clear Cell Renal Carcinoma	No	C64.9	8310/3	C64.9	YES				Left		G3				FALSE	Yes	M0	N0	T3a	Stage III
TCGA-B0-5695	TCGA-B0-5695	2150	days	TCGA Kidney Clear Cell Carcinoma (KIRC)	kidney clear cell carcinoma	Kidney					61				-22320			0	2150					Scheduled Follow-up Submission	Complete Remission/Response	42087	FEMALE	Normal	Kidney Clear Cell Renal Carcinoma	No	C64.9	8310/3	C64.9	YES				Left		G2	NO			FALSE	Yes	M0	N0	T1b	Stage I
TCGA-B0-5696	TCGA-B0-5696	2609	days	TCGA Kidney Clear Cell Carcinoma (KIRC)	kidney clear cell carcinoma	Kidney	NO	NO			69				-25552			0	2609	1727				Scheduled Follow-up Submission	Progressive Disease	42087	MALE	Normal	Kidney Clear Cell Renal Carcinoma	No	C64.9	8310/3	C64.9	YES				Right		G4	YES			FALSE	No	M0	N0	T3a	Stage III
TCGA-B0-5697	TCGA-B0-5697	2630	days	TCGA Kidney Clear Cell Carcinoma (KIRC)	kidney clear cell carcinoma	Kidney					50				-18486			0	2630					Scheduled Follow-up Submission	Complete Remission/Response	42087	MALE	Normal	Kidney Clear Cell Renal Carcinoma	No	C64.9	8310/3	C64.9	YES				Right		G2	NO			FALSE	No	M0	N0	T1a	Stage I
TCGA-B0-5698	TCGA-B0-5698	3631	days	TCGA Kidney Clear Cell Carcinoma (KIRC)	kidney clear cell carcinoma	Kidney					77				-28438			0	3631					Scheduled Follow-up Submission	Complete Remission/Response	42087	MALE	Normal	Kidney Clear Cell Renal Carcinoma	No	C64.9	8310/3	C64.9	YES				Right		G3	NO			FALSE	Yes	M0	N0	T1b	Stage I
TCGA-B0-5699	TCGA-B0-5699	3841	days	TCGA Kidney Clear Cell Carcinoma (KIRC)	kidney clear cell carcinoma	Kidney					53				-19647			0	3841					Scheduled Follow-up Submission	Complete Remission/Response	42087	MALE	Normal	Kidney Clear Cell Renal Carcinoma	No	C64.9	8310/3	C64.9	YES				Left		G2	NO			FALSE	No	M0	N0	T1	Stage I
TCGA-B0-5700	TCGA-B0-5700	1790	days	TCGA Kidney Clear Cell Carcinoma (KIRC)	kidney clear cell carcinoma	Kidney					77				-28184			0	1790					Scheduled Follow-up Submission	Complete Remission/Response	42087	MALE	Low	Kidney Clear Cell Renal Carcinoma	No	C64.9	8310/3	C64.9	YES				Left		G2	NO			FALSE	No	M0	N0	T1a	Stage I
TCGA-B0-5701	TCGA-B0-5701	2461	days	TCGA Kidney Clear Cell Carcinoma (KIRC)	kidney clear cell carcinoma	Kidney					65				-23915			0	2461					Scheduled Follow-up Submission	Complete Remission/Response	42087	MALE	Normal	Kidney Clear Cell Renal Carcinoma	No	C64.9	8310/3	C64.9	YES				Left	4	G4	NO	0		FALSE	No	M0	N0	T3b	Stage III
TCGA-B0-5702	TCGA-B0-5702	2172	days	TCGA Kidney Clear Cell Carcinoma (KIRC)	kidney clear cell carcinoma	Kidney					71				-26186			0	2172					Scheduled Follow-up Submission	Complete Remission/Response	42087	MALE	Normal	Kidney Clear Cell Renal Carcinoma	No	C64.9	8310/3	C64.9	YES				Left		G2	NO			FALSE	No	M0	N0	T1b	Stage I
TCGA-B0-5703	TCGA-B0-5703	2246	days	TCGA Kidney Clear Cell Carcinoma (KIRC)	kidney clear cell carcinoma	Kidney					73				-26897			0	2246					Scheduled Follow-up Submission	Complete Remission/Response	42087	MALE	Normal	Kidney Clear Cell Renal Carcinoma	No	C64.9	8310/3	C64.9	YES				Left		G3	NO			FALSE	No	M0	N0	T1b	Stage I
TCGA-B0-5705	TCGA-B0-5705	4537	days	TCGA Kidney Clear Cell Carcinoma (KIRC)	kidney clear cell carcinoma	Kidney					65				-23746			0	4537					Scheduled Follow-up Submission	Complete Remission/Response	42088	FEMALE	Low	Kidney Clear Cell Renal Carcinoma	No	C64.9	8310/3	C64.9	YES				Left		G2	NO			FALSE	No	M0	N0	T1	Stage I
TCGA-B0-5706	TCGA-B0-5706	3205	days	TCGA Kidney Clear Cell Carcinoma (KIRC)	kidney clear cell carcinoma	Kidney					45				-16442			0	3205					Scheduled Follow-up Submission	Complete Remission/Response	42084	MALE	Low	Kidney Clear Cell Renal Carcinoma	No	C64.9	8310/3	C64.9	YES				Left		G2	NO			FALSE	No	M0	N0	T2	Stage II
TCGA-B0-5707	TCGA-B0-5707	3744	days	TCGA Kidney Clear Cell Carcinoma (KIRC)	kidney clear cell carcinoma	Kidney					39				-14598			0	3744					Scheduled Follow-up Submission	Complete Remission/Response	42088	FEMALE		Kidney Clear Cell Renal Carcinoma	No	C64.9	8310/3	C64.9	YES				Right		G3	NO			FALSE	No	M0	N0	T1a	Stage I
TCGA-B0-5709	TCGA-B0-5709	3974	days	TCGA Kidney Clear Cell Carcinoma (KIRC)	kidney clear cell carcinoma	Kidney					62				-22843			0	3974					Scheduled Follow-up Submission	Complete Remission/Response	42088	FEMALE	Normal	Kidney Clear Cell Renal Carcinoma	No	C64.9	8310/3	C64.9	YES				Right		G3	NO			FALSE	No	M0	NX	T3a	Stage III
TCGA-B0-5710	TCGA-B0-5710	2430	days	TCGA Kidney Clear Cell Carcinoma (KIRC)	kidney clear cell carcinoma	Kidney	NO	NO		YES	57			1441	-21168			0	2430	1441				Scheduled Follow-up Submission	Progressive Disease	42088	MALE	Normal	Kidney Clear Cell Renal Carcinoma	No	C64.9	8310/3	C64.9	YES				Right		G2	YES			FALSE	No	M0	N0	T1b	Stage I
TCGA-B0-5711	TCGA-B0-5711	3989	days	TCGA Kidney Clear Cell Carcinoma (KIRC)	kidney clear cell carcinoma	Kidney	NO	NO		YES	50			3939	-18444			0	3989	3766				Scheduled Follow-up Submission	Progressive Disease	42088	MALE	Normal	Kidney Clear Cell Renal Carcinoma	No	C64.9	8310/3	C64.9	YES				Right		G3	YES			FALSE	No	M0	NX	T3b	Stage III
TCGA-B0-5712	TCGA-B0-5712	2722	days	TCGA Kidney Clear Cell Carcinoma (KIRC)	kidney clear cell carcinoma	Kidney	YES	YES	NO	NO	68				-24988			0	2722	725				Scheduled Follow-up Submission		41043	FEMALE	Low	Kidney Clear Cell Renal Carcinoma	No	C64.9	8310/3	C64.9	YES				Left		G3				FALSE	No	M1	N0	T2	Stage IV
TCGA-B0-5713	TCGA-B0-5713	2782	days	TCGA Kidney Clear Cell Carcinoma (KIRC)	kidney clear cell carcinoma	Kidney					75				-27644			0	2782					Scheduled Follow-up Submission	Complete Remission/Response	42084	FEMALE	Normal	Kidney Clear Cell Renal Carcinoma	No	C64.9	8310/3	C64.9	YES				Left		G3	NO			FALSE	No	M0	N0	T3b	Stage III
TCGA-B0-5812	TCGA-B0-5812	3834	days	TCGA Kidney Clear Cell Carcinoma (KIRC)	kidney clear cell carcinoma	Kidney					53				-19600			0	3834					Scheduled Follow-up Submission	Complete Remission/Response	42087	MALE	Low	Kidney Clear Cell Renal Carcinoma	No	C64.9	8310/3	C64.9	YES				Right		G3	NO			FALSE	Yes	M0	NX	T1b	Stage I
TCGA-B2-3923	TCGA-B2-3923	992	days	TCGA Kidney Clear Cell Carcinoma (KIRC)	kidney clear cell carcinoma	Kidney					59				-21793			0	992		FPPP			Scheduled Follow-up Submission	Complete Remission/Response	41318	MALE	Normal	Kidney Clear Cell Renal Carcinoma	No	C64.9	8310/3	C64.9	YES			Elevated	Right		G2	NO			FALSE	No	M0	NX	T2	Stage II
TCGA-B2-3924	TCGA-B2-3924	1092	days	TCGA Kidney Clear Cell Carcinoma (KIRC)	kidney clear cell carcinoma	Kidney					73				-26846			0	1092		FPPP			Scheduled Follow-up Submission	Complete Remission/Response	41319	MALE	Low	Kidney Clear Cell Renal Carcinoma	No	C64.9	8310/3	C64.9	YES				Left		G2	NO			FALSE	No	M0	NX	T1b	Stage I
TCGA-B2-4098	TCGA-B2-4098	51	days	TCGA Kidney Clear Cell Carcinoma (KIRC)	kidney clear cell carcinoma	Kidney					72				-26606		51	0								40623	FEMALE	Low	Kidney Clear Cell Renal Carcinoma	No	C64.9	8310/3	C64.9	YES				Left		G2				FALSE	No	M0	NX	T1b	Stage I
TCGA-B2-4099	TCGA-B2-4099	972	days	TCGA Kidney Clear Cell Carcinoma (KIRC)	kidney clear cell carcinoma	Kidney					83				-30355			0	972					Scheduled Follow-up Submission	Complete Remission/Response	41319	MALE	Normal	Kidney Clear Cell Renal Carcinoma	No	C64.9	8310/3	C64.9	YES				Right		G3	NO			FALSE	No	M0	NX	T1a	Stage I
TCGA-B2-4101	TCGA-B2-4101	648	days	TCGA Kidney Clear Cell Carcinoma (KIRC)	kidney clear cell carcinoma	Kidney					52				-19059			0	648					Scheduled Follow-up Submission	Complete Remission/Response	41305	MALE	Normal	Kidney Clear Cell Renal Carcinoma	No	C64.9	8310/3	C64.9	YES				Left		G3	NO			FALSE	No	M0	NX	T2a	Stage II
TCGA-B2-4102	TCGA-B2-4102	952	days	TCGA Kidney Clear Cell Carcinoma (KIRC)	kidney clear cell carcinoma	Kidney					61				-22492			0	952					Scheduled Follow-up Submission	Complete Remission/Response	41325	MALE	Normal	Kidney Clear Cell Renal Carcinoma	No	C64.9	8310/3	C64.9	YES				Right		G2	NO			FALSE	No	M0	NX	T1b	Stage I
TCGA-B2-5633	TCGA-B2-5633	963	days	TCGA Kidney Clear Cell Carcinoma (KIRC)	kidney clear cell carcinoma	Kidney					56				-20493			0	963		FPPP			Scheduled Follow-up Submission	Complete Remission/Response	41317	MALE	Normal	Kidney Clear Cell Renal Carcinoma	No	C64.9	8310/3	C64.9	YES				Right		G2	NO			FALSE	No	M0	N0	T1b	Stage I
TCGA-B2-5635	TCGA-B2-5635	755	days	TCGA Kidney Clear Cell Carcinoma (KIRC)	kidney clear cell carcinoma	Kidney					74				-27183	572		0	755		FPPP			Scheduled Follow-up Submission	Complete Remission/Response	41351	MALE	Normal	Kidney Clear Cell Renal Carcinoma	No	C64.9	8310/3	C64.9	YES				Right		G2	NO			FALSE	Yes	M0	NX	T1a	Stage I
TCGA-B2-5636	TCGA-B2-5636	919	days	TCGA Kidney Clear Cell Carcinoma (KIRC)	kidney clear cell carcinoma	Kidney					79				-28901			0	919					Scheduled Follow-up Submission	Complete Remission/Response	41297	MALE	Normal	Kidney Clear Cell Renal Carcinoma	No	C64.9	8310/3	C64.9	YES				Right		G2	NO			FALSE	No	M0	NX	T1a	Stage I
TCGA-B2-5639	TCGA-B2-5639	1003	days	TCGA Kidney Clear Cell Carcinoma (KIRC)	kidney clear cell carcinoma	Kidney	YES	YES	NO	NO	46				-17045		1003	0	248	851				Scheduled Follow-up Submission	Progressive Disease	41352	MALE	Normal	Kidney Clear Cell Renal Carcinoma	Yes	C64.9	8310/3	C64.9	YES		70		Left		G3	YES			FALSE	No	M1	NX	T3	Stage IV
TCGA-B2-5641	TCGA-B2-5641	656	days	TCGA Kidney Clear Cell Carcinoma (KIRC)	kidney clear cell carcinoma	Kidney					79				-28953			0	656					Scheduled Follow-up Submission	Complete Remission/Response	41297	MALE	Normal	Kidney Clear Cell Renal Carcinoma	No	C64.9	8310/3	C64.9	YES				Left		G3	NO			FALSE	No	M0	N0	T1a	Stage I
TCGA-B4-5377	TCGA-B4-5377	365	days	TCGA Kidney Clear Cell Carcinoma (KIRC)	kidney clear cell carcinoma	Kidney					68				-25115			0	365			1	Elevated	Scheduled Follow-up Submission		41997	FEMALE	Low	Kidney Clear Cell Renal Carcinoma	No	C64.9	8310/3	C64.9	YES		90	Elevated	Right		G3				FALSE	No	M1	N0	T3	Stage IV
TCGA-B4-5378	TCGA-B4-5378	175	days	TCGA Kidney Clear Cell Carcinoma (KIRC)	kidney clear cell carcinoma	Kidney					62				-22980			0	175			1	Normal	Scheduled Follow-up Submission		41997	MALE	Low	Kidney Clear Cell Renal Carcinoma	No	C64.9	8310/3	C64.9	YES		90	Normal	Right		G2				FALSE	No	M0	N0	T1	Stage I
TCGA-B4-5832	TCGA-B4-5832	155	days	TCGA Kidney Clear Cell Carcinoma (KIRC)	kidney clear cell carcinoma	Kidney					65				-23806			0	155			1	Normal	Scheduled Follow-up Submission		41997	MALE	Normal	Kidney Clear Cell Renal Carcinoma	No	C64.9	8310/3	C64.9	YES		80		Left		G2	NO			FALSE	No	M0	N0	T3b	Stage III
TCGA-B4-5834	TCGA-B4-5834	26	days	TCGA Kidney Clear Cell Carcinoma (KIRC)	kidney clear cell carcinoma	Kidney					59				-21713			0	26			0	Normal	Scheduled Follow-up Submission		41997	MALE	Normal	Kidney Clear Cell Renal Carcinoma	No	C64.9	8310/3	C64.9	YES		90		Right		G1	NO			FALSE	No	M0	N0	T1	Stage I
TCGA-B4-5835	TCGA-B4-5835	16	days	TCGA Kidney Clear Cell Carcinoma (KIRC)	kidney clear cell carcinoma	Kidney					64				-23408			0	16			0	Normal	Scheduled Follow-up Submission		41997	FEMALE	Normal	Kidney Clear Cell Renal Carcinoma	No	C64.9	8310/3	C64.9	YES		100		Left	7	G2	NO	0		FALSE	No	M0	N0	T1	Stage I
TCGA-B4-5836	TCGA-B4-5836	141	days	TCGA Kidney Clear Cell Carcinoma (KIRC)	kidney clear cell carcinoma	Kidney					61				-22341			0	141			1	Normal	Scheduled Follow-up Submission		41997	FEMALE	Normal	Kidney Clear Cell Renal Carcinoma	No	C64.9	8310/3	C64.9	YES		90		Right	2	G2	NO	0		FALSE	No	M0	N0	T1b	Stage I
TCGA-B4-5838	TCGA-B4-5838	166	days	TCGA Kidney Clear Cell Carcinoma (KIRC)	kidney clear cell carcinoma	Kidney					52				-19242			0	166			1	Normal	Scheduled Follow-up Submission		41997	MALE	Normal	Kidney Clear Cell Renal Carcinoma	No	C64.9	8310/3	C64.9	YES		80		Left	18	G2	NO	2		FALSE	No	M0	N1	T3	Stage IV
TCGA-B4-5843	TCGA-B4-5843	11	days	TCGA Kidney Clear Cell Carcinoma (KIRC)	kidney clear cell carcinoma	Kidney					45				-16779			0	11			1	Normal	Scheduled Follow-up Submission		41997	MALE	Normal	Kidney Clear Cell Renal Carcinoma	No	C64.9	8310/3	C64.9	YES		90		Right		G2	NO			FALSE	No	M0	N0	T1	Stage I
TCGA-B4-5844	TCGA-B4-5844	7	days	TCGA Kidney Clear Cell Carcinoma (KIRC)	kidney clear cell carcinoma	Kidney					61				-22409			0	7			1	Normal	Scheduled Follow-up Submission		41997	FEMALE	Normal	Kidney Clear Cell Renal Carcinoma	No	C64.9	8310/3	C64.9	YES		80		Right		G1				FALSE	No	M0	N0	T2	Stage II
TCGA-B8-4143	TCGA-B8-4143	709	days	TCGA Kidney Clear Cell Carcinoma (KIRC)	kidney clear cell carcinoma	Kidney				YES	66			436	-24132		709	0								40493	FEMALE	Low	Kidney Clear Cell Renal Carcinoma	No	C64.9	8310/3	C64.9	YES		0		Left	2	G3		0		FALSE	No	M1	N0	T3a	Stage IV
TCGA-B8-4146	TCGA-B8-4146	511	days	TCGA Kidney Clear Cell Carcinoma (KIRC)	kidney clear cell carcinoma	Kidney					41				-15063			0	511					Scheduled Follow-up Submission	Complete Remission/Response	41918	FEMALE		Kidney Clear Cell Renal Carcinoma	No	C64.9	8310/3	C64.9	YES				Right		G2	NO		20	FALSE	No	M0	NX	T1b	Stage I
TCGA-B8-4148	TCGA-B8-4148	1520	days	TCGA Kidney Clear Cell Carcinoma (KIRC)	kidney clear cell carcinoma	Kidney					63				-23062			0	1520					Scheduled Follow-up Submission	Complete Remission/Response	41653	FEMALE	Normal	Kidney Clear Cell Renal Carcinoma	No	C64.9	8310/3	C64.9	YES			Normal	Left		G3	NO			FALSE	No	M0	N0	T1a	Stage I
TCGA-B8-4151	TCGA-B8-4151	1299	days	TCGA Kidney Clear Cell Carcinoma (KIRC)	kidney clear cell carcinoma	Kidney					51				-18760			0	1299					Scheduled Follow-up Submission	Complete Remission/Response	41653	FEMALE	Normal	Kidney Clear Cell Renal Carcinoma	No	C64.9	8310/3	C64.9	YES			Normal	Right		G2	NO			FALSE	No	M0	N0	T3a	Stage III
TCGA-B8-4153	TCGA-B8-4153	762	days	TCGA Kidney Clear Cell Carcinoma (KIRC)	kidney clear cell carcinoma	Kidney					74				-27031			0	762			0		Scheduled Follow-up Submission		41016	MALE	Low	Kidney Clear Cell Renal Carcinoma	No	C64.9	8310/3	C64.9	YES			Normal	Left		G3				FALSE	No	M0	NX	T3a	Stage III
TCGA-B8-4154	TCGA-B8-4154	1380	days	TCGA Kidney Clear Cell Carcinoma (KIRC)	kidney clear cell carcinoma	Kidney					73				-26882			0	1380					Scheduled Follow-up Submission	Complete Remission/Response	41653	FEMALE	Normal	Kidney Clear Cell Renal Carcinoma	No	C64.9	8310/3	C64.9	YES			Normal	Left		G2	NO			FALSE	No	M0	N0	T1a	Stage I
TCGA-B8-4619	TCGA-B8-4619	523	days	TCGA Kidney Clear Cell Carcinoma (KIRC)	kidney clear cell carcinoma	Kidney					58				-21206			0	523					Scheduled Follow-up Submission	Complete Remission/Response	41087	MALE	Normal	Kidney Clear Cell Renal Carcinoma	No	C64.9	8310/3	C64.9	YES				Left		G2	NO			FALSE	No	M0	N0	T1a	Stage I
TCGA-B8-4620	TCGA-B8-4620	777	days	TCGA Kidney Clear Cell Carcinoma (KIRC)	kidney clear cell carcinoma	Kidney	NO	NO		NO	70				-25786			0	777	604		1		Scheduled Follow-up Submission	Stable Disease	41087	FEMALE	Low	Kidney Clear Cell Renal Carcinoma	No	C64.9	8310/3	C64.9	YES				Left	2	G2	YES	0		FALSE	No	M0	N0	T3a	Stage III
TCGA-B8-4621	TCGA-B8-4621	788	days	TCGA Kidney Clear Cell Carcinoma (KIRC)	kidney clear cell carcinoma	Kidney					63				-23176			0	788					Scheduled Follow-up Submission	Complete Remission/Response	41122	MALE	Low	Kidney Clear Cell Renal Carcinoma	No	C64.9	8310/3	C64.9	YES			Normal	Left		G3	NO		40	FALSE	Yes	M0	N0	T1b	Stage I
TCGA-B8-4622	TCGA-B8-4622	1525	days	TCGA Kidney Clear Cell Carcinoma (KIRC)	kidney clear cell carcinoma	Kidney	NO	YES	NO	NO	57				-21135			0	1525	1227		0		Additional New Tumor Event	Stable Disease	41898	MALE	Low	Kidney Clear Cell Renal Carcinoma	No	C64.9	8310/3	C64.9	YES		90		Left		G3	YES			FALSE	No	M1	N0	T3a	Stage IV
TCGA-B8-5158	TCGA-B8-5158	1218	days	TCGA Kidney Clear Cell Carcinoma (KIRC)	kidney clear cell carcinoma	Kidney					56				-20764			0	1218					Scheduled Follow-up Submission	Complete Remission/Response	41653	MALE	Normal	Kidney Clear Cell Renal Carcinoma	No	C64.9	8310/3	C64.9	YES				Left	15	G4	NO	1	10	FALSE	No	M0	N1	T3a	Stage III
TCGA-B8-5159	TCGA-B8-5159	722	days	TCGA Kidney Clear Cell Carcinoma (KIRC)	kidney clear cell carcinoma	Kidney					61				-22462			0	722					Scheduled Follow-up Submission	Complete Remission/Response	41653	FEMALE	Normal	Kidney Clear Cell Renal Carcinoma	No	C64.9	8310/3	C64.9	YES			Normal	Right		G3	NO			FALSE	No	M0	N0	T1a	Stage I
TCGA-B8-5162	TCGA-B8-5162	36	days	TCGA Kidney Clear Cell Carcinoma (KIRC)	kidney clear cell carcinoma	Kidney					62				-23008			0	36					Scheduled Follow-up Submission	Complete Remission/Response	41116	MALE	Low	Kidney Clear Cell Renal Carcinoma	Yes	C64.9	8310/3	C64.9	YES				Left		G2				FALSE	Yes	M0	NX	T2a	Stage II
TCGA-B8-5163	TCGA-B8-5163	822	days	TCGA Kidney Clear Cell Carcinoma (KIRC)	kidney clear cell carcinoma	Kidney					63				-23293			0	822					Scheduled Follow-up Submission	Complete Remission/Response	41120	FEMALE		Kidney Clear Cell Renal Carcinoma	No	C64.9	8310/3	C64.9	YES				Right		G3	NO			FALSE	No	M0	N0	T3a	Stage III
TCGA-B8-5164	TCGA-B8-5164	26	days	TCGA Kidney Clear Cell Carcinoma (KIRC)	kidney clear cell carcinoma	Kidney					65				-23863			0	26					Scheduled Follow-up Submission	Complete Remission/Response	41116	MALE		Kidney Clear Cell Renal Carcinoma	No	C64.9	8310/3	C64.9	YES				Right		G3			40	FALSE	No	M0	N0	T3a	Stage III
TCGA-B8-5165	TCGA-B8-5165	737	days	TCGA Kidney Clear Cell Carcinoma (KIRC)	kidney clear cell carcinoma	Kidney					43				-15898			0	737					Scheduled Follow-up Submission	Complete Remission/Response	41093	MALE	Low	Kidney Clear Cell Renal Carcinoma	No	C64.9	8310/3	C64.9	YES				Right		G2	NO			FALSE	No	M0	N0	T1a	Stage I
TCGA-B8-5545	TCGA-B8-5545	1525	days	TCGA Kidney Clear Cell Carcinoma (KIRC)	kidney clear cell carcinoma	Kidney					42				-15376			0	1525					Scheduled Follow-up Submission	Complete Remission/Response	41918	MALE	Low	Kidney Clear Cell Renal Carcinoma	No	C64.9	8310/3	C64.9	YES				Left		G2	NO			FALSE	No	M0	N0	T1a	Stage I
TCGA-B8-5546	TCGA-B8-5546	505	days	TCGA Kidney Clear Cell Carcinoma (KIRC)	kidney clear cell carcinoma	Kidney					38				-14113			0	505					Scheduled Follow-up Submission		40912	FEMALE	Normal	Kidney Clear Cell Renal Carcinoma	No	C64.9	8310/3	C64.9	YES			Elevated	Right		G2				FALSE	No	M0	N0	T1b	Stage I
TCGA-B8-5549	TCGA-B8-5549	194	days	TCGA Kidney Clear Cell Carcinoma (KIRC)	kidney clear cell carcinoma	Kidney					53				-19561			0	194					Scheduled Follow-up Submission	Complete Remission/Response	41918	MALE	Normal	Kidney Clear Cell Renal Carcinoma	No	C64.9	8310/3	C64.9	YES				Right		G3	NO			FALSE	No	M0	N0	T1b	Stage I
TCGA-B8-5550	TCGA-B8-5550	1476	days	TCGA Kidney Clear Cell Carcinoma (KIRC)	kidney clear cell carcinoma	Kidney	YES	NO	NO	NO	71				-25937			0	1476	694		3		Additional New Tumor Event	Progressive Disease	41918	MALE	Normal	Kidney Clear Cell Renal Carcinoma	No	C64.9	8310/3	C64.9	YES				Right	3	G3	YES	0	20	FALSE	No	M0	N0	T3a	Stage III
TCGA-B8-5551	TCGA-B8-5551	16	days	TCGA Kidney Clear Cell Carcinoma (KIRC)	kidney clear cell carcinoma	Kidney					65				-23976			0	16					Scheduled Follow-up Submission	Complete Remission/Response	41116	FEMALE	Normal	Kidney Clear Cell Renal Carcinoma	No	C64.9	8310/3	C64.9	YES				Right		G3				FALSE	No	M0	N0	T1b	Stage I
TCGA-B8-5552	TCGA-B8-5552	1046	days	TCGA Kidney Clear Cell Carcinoma (KIRC)	kidney clear cell carcinoma	Kidney					41				-15219			0	1046					Scheduled Follow-up Submission	Complete Remission/Response	41575	FEMALE	Normal	Kidney Clear Cell Renal Carcinoma	No	C64.9	8310/3	C64.9	YES				Right		G2	NO			FALSE	No	M0	NX	T1b	Stage I
TCGA-B8-5553	TCGA-B8-5553	435	days	TCGA Kidney Clear Cell Carcinoma (KIRC)	kidney clear cell carcinoma	Kidney					67				-24729			0	435					Scheduled Follow-up Submission		40912	FEMALE	Normal	Kidney Clear Cell Renal Carcinoma	No	C64.9	8310/3	C64.9	YES			Normal	Left		G2				FALSE	No	M0	N0	T1b	Stage I
TCGA-BP-4158	TCGA-BP-4158	3377	days	TCGA Kidney Clear Cell Carcinoma (KIRC)	kidney clear cell carcinoma	Kidney					69				-25210			0	3377							40581	MALE	Low	Kidney Clear Cell Renal Carcinoma	No	C64.9	8310/3	C64.9	YES				Right	5	G2		0		FALSE	Yes	M0	N0	T1b	Stage I
TCGA-BP-4159	TCGA-BP-4159	2601	days	TCGA Kidney Clear Cell Carcinoma (KIRC)	kidney clear cell carcinoma	Kidney			NO		70				-25677		2601	0		2352						40625	MALE	Normal	Kidney Clear Cell Renal Carcinoma	No	C64.9	8310/3	C64.9	YES				Right		G2		0		FALSE	No	M0	N0	T1b	Stage I
TCGA-BP-4160	TCGA-BP-4160	2881	days	TCGA Kidney Clear Cell Carcinoma (KIRC)	kidney clear cell carcinoma	Kidney					67				-24720			0	2881							40584	MALE	Low	Kidney Clear Cell Renal Carcinoma	No	C64.9	8310/3	C64.9	YES				Left	3	G2		0		FALSE	Yes	M0	N0	T3a	Stage III
TCGA-BP-4161	TCGA-BP-4161	2746	days	TCGA Kidney Clear Cell Carcinoma (KIRC)	kidney clear cell carcinoma	Kidney	YES	NO	NO	NO	74				-27119			0	2746	2685						40633	MALE	Low	Kidney Clear Cell Renal Carcinoma	No	C64.9	8310/3	C64.9	YES				Right		G3				FALSE	No	M0	NX	T1b	Stage I
TCGA-BP-4162	TCGA-BP-4162	3074	days	TCGA Kidney Clear Cell Carcinoma (KIRC)	kidney clear cell carcinoma	Kidney					65				-23966			0	3074							40585	FEMALE	Low	Kidney Clear Cell Renal Carcinoma	No	C64.9	8310/3	C64.9	YES				Right	3	G2		0		FALSE	No	M0	N0	T1b	Stage I
TCGA-BP-4163	TCGA-BP-4163	2839	days	TCGA Kidney Clear Cell Carcinoma (KIRC)	kidney clear cell carcinoma	Kidney					60				-21980			0	2839							40585	FEMALE	Low	Kidney Clear Cell Renal Carcinoma	No	C64.9	8310/3	C64.9	YES				Right	9	G3		0		FALSE	No	M0	N0	T3a	Stage III
TCGA-BP-4164	TCGA-BP-4164	992	days	TCGA Kidney Clear Cell Carcinoma (KIRC)	kidney clear cell carcinoma	Kidney					51				-18898		992	0								40633	FEMALE	Low	Kidney Clear Cell Renal Carcinoma	No	C64.9	8310/3	C64.9	YES			Normal	Left		G2				FALSE	No	M0	NX	T3a	Stage III
TCGA-BP-4165	TCGA-BP-4165	3037	days	TCGA Kidney Clear Cell Carcinoma (KIRC)	kidney clear cell carcinoma	Kidney	NO	YES	NO	NO	64				-23685			0	3037	1838						40659	FEMALE	Low	Kidney Clear Cell Renal Carcinoma	No	C64.9	8310/3	C64.9	YES				Right	2	G1		0		FALSE	No	M0	N0	T1b	Stage I
TCGA-BP-4166	TCGA-BP-4166	13	days	TCGA Kidney Clear Cell Carcinoma (KIRC)	kidney clear cell carcinoma	Kidney					69				-25300			0	13							40585	MALE	Low	Kidney Clear Cell Renal Carcinoma	No	C64.9	8310/3	C64.9	YES				Left	10	G3		0		FALSE	No	M0	N0	T3a	Stage III
TCGA-BP-4167	TCGA-BP-4167	2718	days	TCGA Kidney Clear Cell Carcinoma (KIRC)	kidney clear cell carcinoma	Kidney					59				-21901			0	2718							40585	MALE	Low	Kidney Clear Cell Renal Carcinoma	No	C64.9	8310/3	C64.9	YES				Right		G2				FALSE	No	M0	NX	T3a	Stage III
TCGA-BP-4169	TCGA-BP-4169	701	days	TCGA Kidney Clear Cell Carcinoma (KIRC)	kidney clear cell carcinoma	Kidney	YES	NO	NO	NO	76				-27778		701	0		78						40661	FEMALE	Low	Kidney Clear Cell Renal Carcinoma	No	C64.9	8310/3	C64.9	YES				Right	2	G2		0		FALSE	No	M0	N0	T2	Stage II
TCGA-BP-4173	TCGA-BP-4173	1893	days	TCGA Kidney Clear Cell Carcinoma (KIRC)	kidney clear cell carcinoma	Kidney					47				-17449			0	1893							40585	MALE	Low	Kidney Clear Cell Renal Carcinoma	No	C64.9	8310/3	C64.9	YES				Right	5	G3		0		FALSE	No	M0	N0	T2	Stage II
TCGA-BP-4174	TCGA-BP-4174	1879	days	TCGA Kidney Clear Cell Carcinoma (KIRC)	kidney clear cell carcinoma	Kidney					49				-18054			0	1879							40585	MALE	Low	Kidney Clear Cell Renal Carcinoma	No	C64.9	8310/3	C64.9	YES				Right	3	G3		0		FALSE	No	M0	N0	T2	Stage II
TCGA-BP-4176	TCGA-BP-4176	1955	days	TCGA Kidney Clear Cell Carcinoma (KIRC)	kidney clear cell carcinoma	Kidney					64				-23609			0	1955							40585	MALE	Normal	Kidney Clear Cell Renal Carcinoma	No	C64.9	8310/3	C64.9	YES				Right		G2				FALSE	No	M0	NX	T1b	Stage I
TCGA-BP-4177	TCGA-BP-4177	1670	days	TCGA Kidney Clear Cell Carcinoma (KIRC)	kidney clear cell carcinoma	Kidney					65				-23955			0	1670							40585	MALE	Normal	Kidney Clear Cell Renal Carcinoma	No	C64.9	8310/3	C64.9	YES				Right		G2				FALSE	No	M0	NX	T1a	Stage I
TCGA-BP-4325	TCGA-BP-4325	2964	days	TCGA Kidney Clear Cell Carcinoma (KIRC)	kidney clear cell carcinoma	Kidney					64				-23588			0	2964							40585	FEMALE	Normal	Kidney Clear Cell Renal Carcinoma	No	C64.9	8310/3	C64.9	YES				Left		G2				FALSE	No	M0	N0	T1b	Stage I
TCGA-BP-4326	TCGA-BP-4326	1625	days	TCGA Kidney Clear Cell Carcinoma (KIRC)	kidney clear cell carcinoma	Kidney	NO	YES	NO	NO	53				-19376		1625	0	1625	958						40661	FEMALE	Low	Kidney Clear Cell Renal Carcinoma	No	C64.9	8310/3	C64.9	YES				Left	3	G2		0		FALSE	No	M0	N0	T1b	Stage I
TCGA-BP-4327	TCGA-BP-4327	109	days	TCGA Kidney Clear Cell Carcinoma (KIRC)	kidney clear cell carcinoma	Kidney					75				-27556		109	0								40585	FEMALE	Low	Kidney Clear Cell Renal Carcinoma	No	C64.9	8310/3	C64.9	YES				Right	6	G2		0		FALSE	Yes	M0	N0	T2	Stage II
TCGA-BP-4329	TCGA-BP-4329	845	days	TCGA Kidney Clear Cell Carcinoma (KIRC)	kidney clear cell carcinoma	Kidney	NO	YES	NO	NO	75				-27699		845	0	845	700						40661	MALE	Low	Kidney Clear Cell Renal Carcinoma	No	C64.9	8310/3	C64.9	YES				Right	1	G2		0		FALSE	No	M0	N0	T3a	Stage III
TCGA-BP-4330	TCGA-BP-4330	1888	days	TCGA Kidney Clear Cell Carcinoma (KIRC)	kidney clear cell carcinoma	Kidney					60				-22239			0	1888							40585	FEMALE	Normal	Kidney Clear Cell Renal Carcinoma	No	C64.9	8310/3	C64.9	YES				Left	13	G2		0		FALSE	No	M0	N0	T3a	Stage III
TCGA-BP-4331	TCGA-BP-4331	2454	days	TCGA Kidney Clear Cell Carcinoma (KIRC)	kidney clear cell carcinoma	Kidney					52				-19022		2454	0								40632	MALE	Low	Kidney Clear Cell Renal Carcinoma	No	C64.9	8310/3	C64.9	YES				Left		G2				FALSE	Yes	M0	N0	T1a	Stage I
TCGA-BP-4332	TCGA-BP-4332	1133	days	TCGA Kidney Clear Cell Carcinoma (KIRC)	kidney clear cell carcinoma	Kidney					36				-13404			0	1133							40585	MALE	Low	Kidney Clear Cell Renal Carcinoma	No	C64.9	8310/3	C64.9	YES				Left		G2				FALSE	No	M0	N0	T3a	Stage III
TCGA-BP-4334	TCGA-BP-4334	645	days	TCGA Kidney Clear Cell Carcinoma (KIRC)	kidney clear cell carcinoma	Kidney	YES	YES	NO	NO	56				-20609		645	0	645	442						40665	MALE	Low	Kidney Clear Cell Renal Carcinoma	No	C64.9	8310/3	C64.9	YES				Right	1	G3		0		FALSE	No	M0	N0	T3a	Stage III
TCGA-BP-4335	TCGA-BP-4335	475	days	TCGA Kidney Clear Cell Carcinoma (KIRC)	kidney clear cell carcinoma	Kidney	NO	NO	NO	NO	65				-23860		475	0		454						40665	FEMALE	Low	Kidney Clear Cell Renal Carcinoma	No	C64.9	8310/3	C64.9	YES				Left		G3				FALSE	No	M1	N0	T3a	Stage IV
TCGA-BP-4337	TCGA-BP-4337	2	days	TCGA Kidney Clear Cell Carcinoma (KIRC)	kidney clear cell carcinoma	Kidney					76				-27906		2	0								40588	FEMALE	Normal	Kidney Clear Cell Renal Carcinoma	No	C64.9	8310/3	C64.9	YES				Left	4	G4		0		FALSE	No	M0	N0	T3b	Stage III
TCGA-BP-4338	TCGA-BP-4338	2859	days	TCGA Kidney Clear Cell Carcinoma (KIRC)	kidney clear cell carcinoma	Kidney	YES	NO	NO	NO	43				-15891			0	2859	2572						40665	MALE	Low	Kidney Clear Cell Renal Carcinoma	No	C64.9	8310/3	C64.9	YES				Left		G3				FALSE	No	M0	N0	T1b	Stage I
TCGA-BP-4340	TCGA-BP-4340	562	days	TCGA Kidney Clear Cell Carcinoma (KIRC)	kidney clear cell carcinoma	Kidney					70				-25752		562	0								40588	FEMALE	Low	Kidney Clear Cell Renal Carcinoma	No	C64.9	8310/3	C64.9	YES				Right		G2				FALSE	No	M0	N0	T1b	Stage I
TCGA-BP-4341	TCGA-BP-4341	1589	days	TCGA Kidney Clear Cell Carcinoma (KIRC)	kidney clear cell carcinoma	Kidney					67				-24727		1589	0								40529	MALE	Low	Kidney Clear Cell Renal Carcinoma	No	C64.9	8310/3	C64.9	YES				Left		G2				FALSE	No	M0	NX	T3a	Stage III
TCGA-BP-4342	TCGA-BP-4342	2256	days	TCGA Kidney Clear Cell Carcinoma (KIRC)	kidney clear cell carcinoma	Kidney	YES	NO	NO	NO	79				-29032		2256	0		240						40632	MALE	Low	Kidney Clear Cell Renal Carcinoma	Yes	C64.9	8310/3	C64.9	YES				Left	7	G3		0		FALSE	Yes	M0	N0	T2	Stage II
TCGA-BP-4343	TCGA-BP-4343	1912	days	TCGA Kidney Clear Cell Carcinoma (KIRC)	kidney clear cell carcinoma	Kidney	NO	NO	NO	NO	64				-23498		1912	0		1876						40665	MALE	Low	Kidney Clear Cell Renal Carcinoma	No	C64.9	8310/3	C64.9	YES				Right	7	G3		0		FALSE	No	M0	N0	T3a	Stage III
TCGA-BP-4344	TCGA-BP-4344	1666	days	TCGA Kidney Clear Cell Carcinoma (KIRC)	kidney clear cell carcinoma	Kidney					75				-27561			0	1666							40588	FEMALE	Low	Kidney Clear Cell Renal Carcinoma	Yes	C64.9	8310/3	C64.9	YES				Right		G2				FALSE	Yes	M0	NX	T1a	Stage I
TCGA-BP-4345	TCGA-BP-4345	1516	days	TCGA Kidney Clear Cell Carcinoma (KIRC)	kidney clear cell carcinoma	Kidney					62				-22879			0	1516							40588	MALE	Normal	Kidney Clear Cell Renal Carcinoma	No	C64.9	8310/3	C64.9	YES				Right	1	G3		0		FALSE	No	M0	N0	T3b	Stage III
TCGA-BP-4346	TCGA-BP-4346	1493	days	TCGA Kidney Clear Cell Carcinoma (KIRC)	kidney clear cell carcinoma	Kidney					57				-21057		1493	0								40588	MALE	Low	Kidney Clear Cell Renal Carcinoma	No	C64.9	8310/3	C64.9	YES				Right	21	G3		0		FALSE	No	M0	N0	T3b	Stage III
TCGA-BP-4347	TCGA-BP-4347	1367	days	TCGA Kidney Clear Cell Carcinoma (KIRC)	kidney clear cell carcinoma	Kidney					74				-27146			0	1367							40588	MALE	Low	Kidney Clear Cell Renal Carcinoma	No	C64.9	8310/3	C64.9	YES				Right		G2				FALSE	No	M0	NX	T3b	Stage III
TCGA-BP-4351	TCGA-BP-4351	970	days	TCGA Kidney Clear Cell Carcinoma (KIRC)	kidney clear cell carcinoma	Kidney	NO	NO	NO	NO	51				-18662			0	970	873						40666	FEMALE	Low	Kidney Clear Cell Renal Carcinoma	No	C64.9	8310/3	C64.9	YES				Left	17	G2		0		FALSE	No	M0	N0	T3a	Stage III
TCGA-BP-4352	TCGA-BP-4352	344	days	TCGA Kidney Clear Cell Carcinoma (KIRC)	kidney clear cell carcinoma	Kidney	NO	NO	NO	YES	74			277	-27253		344	0		265						40666	FEMALE	Low	Kidney Clear Cell Renal Carcinoma	No	C64.9	8310/3	C64.9	YES				Right	10	G4		0		FALSE	No	M1	N0	T3b	Stage IV
TCGA-BP-4353	TCGA-BP-4353	375	days	TCGA Kidney Clear Cell Carcinoma (KIRC)	kidney clear cell carcinoma	Kidney					61				-22415		375	0								40589	MALE	Normal	Kidney Clear Cell Renal Carcinoma	Yes	C64.9	8310/3	C64.9	YES				Left		G2				FALSE	Yes	M0	N0	T1	Stage I
TCGA-BP-4354	TCGA-BP-4354	1034	days	TCGA Kidney Clear Cell Carcinoma (KIRC)	kidney clear cell carcinoma	Kidney	NO	YES	NO	NO	40				-14973		1034	0		685						40632	MALE	Low	Kidney Clear Cell Renal Carcinoma	Yes	C64.9	8310/3	C64.9	YES			Normal	Left	21	G4		1		FALSE	No	M1	N1	T4	Stage IV
TCGA-BP-4355	TCGA-BP-4355	953	days	TCGA Kidney Clear Cell Carcinoma (KIRC)	kidney clear cell carcinoma	Kidney		NO	NO	NO	59				-21642		953	0								40658	FEMALE	Low	Kidney Clear Cell Renal Carcinoma	No	C64.9	8310/3	C64.9	YES				Left		G4				FALSE	No	M0	NX	T3a	Stage III
TCGA-BP-4756	TCGA-BP-4756	374	days	TCGA Kidney Clear Cell Carcinoma (KIRC)	kidney clear cell carcinoma	Kidney					62				-23001			0	374							40589	FEMALE	Normal	Kidney Clear Cell Renal Carcinoma	No	C64.9	8310/3	C64.9	YES				Right	1	G2		0		FALSE	No	M0	N0	T1b	Stage I
TCGA-BP-4758	TCGA-BP-4758	2208	days	TCGA Kidney Clear Cell Carcinoma (KIRC)	kidney clear cell carcinoma	Kidney					40				-14824			0	2208							40589	MALE	Low	Kidney Clear Cell Renal Carcinoma	No	C64.9	8310/3	C64.9	YES				Right		G2				FALSE	No	M0	NX	T1a	Stage I
TCGA-BP-4759	TCGA-BP-4759	2372	days	TCGA Kidney Clear Cell Carcinoma (KIRC)	kidney clear cell carcinoma	Kidney					50				-18569			0	2372							40589	MALE	Normal	Kidney Clear Cell Renal Carcinoma	No	C64.9	8310/3	C64.9	YES				Left		G2				FALSE	No	M0	NX	T1a	Stage I
TCGA-BP-4760	TCGA-BP-4760	2361	days	TCGA Kidney Clear Cell Carcinoma (KIRC)	kidney clear cell carcinoma	Kidney	NO	NO	NO	NO	69				-25268			0	2361	1457						40633	MALE	Normal	Kidney Clear Cell Renal Carcinoma	No	C64.9	8310/3	C64.9	YES				Left		G2				FALSE	Yes	M0	NX	T1a	Stage I
TCGA-BP-4761	TCGA-BP-4761	182	days	TCGA Kidney Clear Cell Carcinoma (KIRC)	kidney clear cell carcinoma	Kidney					57				-21019			0	182							40666	MALE	Low	Kidney Clear Cell Renal Carcinoma	No	C64.9	8310/3	C64.9	YES				Right	16	G4		2		FALSE	No	M0	N1	T3a	Stage III
TCGA-BP-4762	TCGA-BP-4762	1343	days	TCGA Kidney Clear Cell Carcinoma (KIRC)	kidney clear cell carcinoma	Kidney					42				-15358		1343	0								40589	MALE	Low	Kidney Clear Cell Renal Carcinoma	No	C64.9	8310/3	C64.9	YES				Left		G3				FALSE	Yes	M0	NX	T1a	Stage I
TCGA-BP-4763	TCGA-BP-4763	1270	days	TCGA Kidney Clear Cell Carcinoma (KIRC)	kidney clear cell carcinoma	Kidney					79				-29150		1270	0								40589	FEMALE	Low	Kidney Clear Cell Renal Carcinoma	No	C64.9	8310/3	C64.9	YES				Right		G2				FALSE	No	M0	NX	T1a	Stage I
TCGA-BP-4765	TCGA-BP-4765	2184	days	TCGA Kidney Clear Cell Carcinoma (KIRC)	kidney clear cell carcinoma	Kidney					43				-15814			0	2184							40589	MALE	Normal	Kidney Clear Cell Renal Carcinoma	No	C64.9	8310/3	C64.9	YES				Right		G2				FALSE	No	M0	NX	T1a	Stage I
TCGA-BP-4766	TCGA-BP-4766	1462	days	TCGA Kidney Clear Cell Carcinoma (KIRC)	kidney clear cell carcinoma	Kidney					43				-15799			0	1462							40589	FEMALE	Low	Kidney Clear Cell Renal Carcinoma	No	C64.9	8310/3	C64.9	YES				Right		G3				FALSE	No	M0	NX	T1a	Stage I
TCGA-BP-4768	TCGA-BP-4768	400	days	TCGA Kidney Clear Cell Carcinoma (KIRC)	kidney clear cell carcinoma	Kidney					72				-26474			0	400							40589	FEMALE	Low	Kidney Clear Cell Renal Carcinoma	No	C64.9	8310/3	C64.9	YES				Left	7	G2		0		FALSE	No	M0	N0	T1a	Stage I
TCGA-BP-4769	TCGA-BP-4769	1876	days	TCGA Kidney Clear Cell Carcinoma (KIRC)	kidney clear cell carcinoma	Kidney					63				-23190			0	1876							40589	MALE	Low	Kidney Clear Cell Renal Carcinoma	No	C64.9	8310/3	C64.9	YES				Left		G2				FALSE	No	M0	NX	T1a	Stage I
TCGA-BP-4770	TCGA-BP-4770	329	days	TCGA Kidney Clear Cell Carcinoma (KIRC)	kidney clear cell carcinoma	Kidney	NO	YES	NO	NO	73				-26824		329	0		208						40667	FEMALE	Low	Kidney Clear Cell Renal Carcinoma	No	C64.9	8310/3	C64.9	YES			Normal	Left	13	G4		0		FALSE	No	M0	N0	T4	Stage IV
TCGA-BP-4771	TCGA-BP-4771	162	days	TCGA Kidney Clear Cell Carcinoma (KIRC)	kidney clear cell carcinoma	Kidney	NO	NO	NO	NO	62				-22771		162	0		110						40633	MALE	Normal	Kidney Clear Cell Renal Carcinoma	Yes	C64.9	8310/3	C64.9	YES				Right	5	G4		0		FALSE	No	M1	N0	T3a	Stage IV
TCGA-BP-4775	TCGA-BP-4775	1843	days	TCGA Kidney Clear Cell Carcinoma (KIRC)	kidney clear cell carcinoma	Kidney					55				-20369			0	1843							40589	FEMALE	Low	Kidney Clear Cell Renal Carcinoma	No	C64.9	8310/3	C64.9	YES				Left		G2				FALSE	Yes	M0	NX	T1a	Stage I
TCGA-BP-4776	TCGA-BP-4776	411	days	TCGA Kidney Clear Cell Carcinoma (KIRC)	kidney clear cell carcinoma	Kidney					52				-19143			0	411							40589	MALE	Normal	Kidney Clear Cell Renal Carcinoma	No	C64.9	8310/3	C64.9	YES				Left		G2				FALSE	No	M0	NX	T1a	Stage I
TCGA-BP-4777	TCGA-BP-4777	1731	days	TCGA Kidney Clear Cell Carcinoma (KIRC)	kidney clear cell carcinoma	Kidney					46				-17133			0	1731							40589	MALE	Low	Kidney Clear Cell Renal Carcinoma	No	C64.9	8310/3	C64.9	YES				Right		G3				FALSE	No	M0	NX	T1a	Stage I
TCGA-BP-4781	TCGA-BP-4781	2080	days	TCGA Kidney Clear Cell Carcinoma (KIRC)	kidney clear cell carcinoma	Kidney	NO	NO	NO	NO	78				-28701			0	2080							40667	MALE	Low	Kidney Clear Cell Renal Carcinoma	No	C64.9	8310/3	C64.9	YES				Right		G3				FALSE	No	M0	NX	T1a	Stage I
TCGA-BP-4782	TCGA-BP-4782	354	days	TCGA Kidney Clear Cell Carcinoma (KIRC)	kidney clear cell carcinoma	Kidney	NO	NO	NO	NO	55				-20102			0	354							40658	FEMALE	Low	Kidney Clear Cell Renal Carcinoma	No	C64.9	8310/3	C64.9	YES				Left		G2				FALSE	No	M0	NX	T1a	Stage I
TCGA-BP-4787	TCGA-BP-4787	480	days	TCGA Kidney Clear Cell Carcinoma (KIRC)	kidney clear cell carcinoma	Kidney	NO	NO	NO	NO	59				-21697		480	0		441						40672	FEMALE	Low	Kidney Clear Cell Renal Carcinoma	No	C64.9	8310/3	C64.9	YES			Normal	Left	19	G4		0		FALSE	No	M1	N0	T3a	Stage IV
TCGA-BP-4789	TCGA-BP-4789	1489	days	TCGA Kidney Clear Cell Carcinoma (KIRC)	kidney clear cell carcinoma	Kidney	NO	NO	NO	NO	48				-17540			0	1489							40672	MALE	Normal	Kidney Clear Cell Renal Carcinoma	No	C64.9	8310/3	C64.9	YES				Right		G2				FALSE	No	M0	NX	T1a	Stage I
TCGA-BP-4790	TCGA-BP-4790	1111	days	TCGA Kidney Clear Cell Carcinoma (KIRC)	kidney clear cell carcinoma	Kidney	NO	NO	NO	NO	76				-28076		1111	0								40672	MALE	Normal	Kidney Clear Cell Renal Carcinoma	No	C64.9	8310/3	C64.9	YES				Right		G2				FALSE	No	M0	NX	T1a	Stage I
TCGA-BP-4795	TCGA-BP-4795	620	days	TCGA Kidney Clear Cell Carcinoma (KIRC)	kidney clear cell carcinoma	Kidney	NO	NO	NO	NO	74				-27162			0	620							40658	FEMALE	Low	Kidney Clear Cell Renal Carcinoma	No	C64.9	8310/3	C64.9	YES				Right	2	G2		0		FALSE	Yes	M0	N0	T1a	Stage I
TCGA-BP-4797	TCGA-BP-4797	1107	days	TCGA Kidney Clear Cell Carcinoma (KIRC)	kidney clear cell carcinoma	Kidney	NO	NO	NO	NO	34				-12508			0	1107							40672	MALE	Normal	Kidney Clear Cell Renal Carcinoma	No	C64.9	8310/3	C64.9	YES				Right	5	G3		0		FALSE	No	M0	N0	T3b	Stage III
TCGA-BP-4798	TCGA-BP-4798	334	days	TCGA Kidney Clear Cell Carcinoma (KIRC)	kidney clear cell carcinoma	Kidney	NO	NO	NO	NO	74				-27335		334	0								40672	MALE	Low	Kidney Clear Cell Renal Carcinoma	No	C64.9	8310/3	C64.9	YES				Left	30	G4		0		FALSE	No	M1	N0	T3b	[Discrepancy]
TCGA-BP-4799	TCGA-BP-4799	1133	days	TCGA Kidney Clear Cell Carcinoma (KIRC)	kidney clear cell carcinoma	Kidney	NO	NO	NO	NO	70				-25842		1133	0		352						40672	MALE	Normal	Kidney Clear Cell Renal Carcinoma	No	C64.9	8310/3	C64.9	YES				Right	2	G3		0		FALSE	Yes	M0	N0	T3b	Stage III
TCGA-BP-4801	TCGA-BP-4801	1124	days	TCGA Kidney Clear Cell Carcinoma (KIRC)	kidney clear cell carcinoma	Kidney					57				-20825			0	1124							40589	MALE	Low	Kidney Clear Cell Renal Carcinoma	No	C64.9	8310/3	C64.9	YES				Left		G2				FALSE	No	M0	NX	T1a	Stage I
TCGA-BP-4803	TCGA-BP-4803	204	days	TCGA Kidney Clear Cell Carcinoma (KIRC)	kidney clear cell carcinoma	Kidney					79				-28934			0	204					Scheduled Follow-up Submission		40946	MALE	Low	Kidney Clear Cell Renal Carcinoma	No	C64.9	8310/3	C64.9	YES				Right		G3				FALSE	No	M0	NX	T3a	Stage III
TCGA-BP-4804	TCGA-BP-4804	1459	days	TCGA Kidney Clear Cell Carcinoma (KIRC)	kidney clear cell carcinoma	Kidney	YES	NO	NO	NO	59				-21727			0	1459	1270				Additional New Tumor Event		40946	MALE	Low	Kidney Clear Cell Renal Carcinoma	No	C64.9	8310/3	C64.9	YES				Right		G2				FALSE	No	M0	NX	T1b	Stage I
TCGA-BP-4807	TCGA-BP-4807	211	days	TCGA Kidney Clear Cell Carcinoma (KIRC)	kidney clear cell carcinoma	Kidney					42				-15360			0	211							40672	MALE	Normal	Kidney Clear Cell Renal Carcinoma	No	C64.9	8310/3	C64.9	YES				Right		G3				FALSE	Yes	M0	NX	T1a	Stage I
TCGA-BP-4959	TCGA-BP-4959	2660	days	TCGA Kidney Clear Cell Carcinoma (KIRC)	kidney clear cell carcinoma	Kidney					49				-17968			0	2660							40589	MALE	Low	Kidney Clear Cell Renal Carcinoma	No	C64.9	8310/3	C64.9	YES				Right		G3				FALSE	No	M0	NX	T1b	Stage I
TCGA-BP-4960	TCGA-BP-4960	2172	days	TCGA Kidney Clear Cell Carcinoma (KIRC)	kidney clear cell carcinoma	Kidney					46				-17099			0	2172							40589	MALE	Low	Kidney Clear Cell Renal Carcinoma	No	C64.9	8310/3	C64.9	YES				Left	9	G3		0		FALSE	No	M0	N0	T2	Stage II
TCGA-BP-4961	TCGA-BP-4961	1935	days	TCGA Kidney Clear Cell Carcinoma (KIRC)	kidney clear cell carcinoma	Kidney					47				-17284			0	1935							40589	MALE	Low	Kidney Clear Cell Renal Carcinoma	No	C64.9	8310/3	C64.9	YES				Right		G2				FALSE	No	M0	NX	T1a	Stage I
TCGA-BP-4962	TCGA-BP-4962	1785	days	TCGA Kidney Clear Cell Carcinoma (KIRC)	kidney clear cell carcinoma	Kidney					58				-21255			0	1785							40589	MALE	Low	Kidney Clear Cell Renal Carcinoma	No	C64.9	8310/3	C64.9	YES				Left		G2				FALSE	No	M0	NX	T2	Stage II
TCGA-BP-4963	TCGA-BP-4963	1834	days	TCGA Kidney Clear Cell Carcinoma (KIRC)	kidney clear cell carcinoma	Kidney					63				-23373			0	1834							40589	MALE	Low	Kidney Clear Cell Renal Carcinoma	No	C64.9	8310/3	C64.9	YES				Left		G3				FALSE	No	M0	NX	T1b	Stage I
TCGA-BP-4965	TCGA-BP-4965	1871	days	TCGA Kidney Clear Cell Carcinoma (KIRC)	kidney clear cell carcinoma	Kidney					46				-16992			0	1871							40589	MALE	Normal	Kidney Clear Cell Renal Carcinoma	Yes	C64.9	8310/3	C64.9	YES				Left		G2				FALSE	Yes	M0	NX	T1a	Stage I
TCGA-BP-4967	TCGA-BP-4967	205	days	TCGA Kidney Clear Cell Carcinoma (KIRC)	kidney clear cell carcinoma	Kidney					76				-27857			0	205							40592	MALE	Low	Kidney Clear Cell Renal Carcinoma	No	C64.9	8310/3	C64.9	YES				Right	5	G2		0		FALSE	No	M0	N0	T3a	Stage III
TCGA-BP-4968	TCGA-BP-4968	1746	days	TCGA Kidney Clear Cell Carcinoma (KIRC)	kidney clear cell carcinoma	Kidney					40				-14651			0	1746							40591	MALE	Low	Kidney Clear Cell Renal Carcinoma	No	C64.9	8310/3	C64.9	YES				Right	3	G3		0		FALSE	No	M0	N0	T1b	Stage I
TCGA-BP-4969	TCGA-BP-4969	1794	days	TCGA Kidney Clear Cell Carcinoma (KIRC)	kidney clear cell carcinoma	Kidney					63				-23216			0	1794							40591	FEMALE	Normal	Kidney Clear Cell Renal Carcinoma	No	C64.9	8310/3	C64.9	YES				Right		G2				FALSE	No	M0	NX	T1a	Stage I
TCGA-BP-4970	TCGA-BP-4970	433	days	TCGA Kidney Clear Cell Carcinoma (KIRC)	kidney clear cell carcinoma	Kidney					44				-16228			0	433							40591	MALE	Normal	Kidney Clear Cell Renal Carcinoma	No	C64.9	8310/3	C64.9	YES				Right	2	G3		2		FALSE	No	M0	N1	T1a	Stage III
TCGA-BP-4971	TCGA-BP-4971	1487	days	TCGA Kidney Clear Cell Carcinoma (KIRC)	kidney clear cell carcinoma	Kidney					40				-14675			0	1487							40591	MALE	Low	Kidney Clear Cell Renal Carcinoma	No	C64.9	8310/3	C64.9	YES				Right	5	G3		0		FALSE	No	M0	N0	T3a	Stage III
TCGA-BP-4972	TCGA-BP-4972	1502	days	TCGA Kidney Clear Cell Carcinoma (KIRC)	kidney clear cell carcinoma	Kidney					43				-16038			0	1502							40591	FEMALE	Normal	Kidney Clear Cell Renal Carcinoma	No	C64.9	8310/3	C64.9	YES				Left		G3				FALSE	No	M0	NX	T3a	Stage III
TCGA-BP-4973	TCGA-BP-4973	1384	days	TCGA Kidney Clear Cell Carcinoma (KIRC)	kidney clear cell carcinoma	Kidney					47				-17461			0	1384							40591	MALE	Normal	Kidney Clear Cell Renal Carcinoma	No	C64.9	8310/3	C64.9	YES				Right		G3				FALSE	No	M0	NX	T3a	Stage III
TCGA-BP-4974	TCGA-BP-4974	211	days	TCGA Kidney Clear Cell Carcinoma (KIRC)	kidney clear cell carcinoma	Kidney	YES	NO	NO	NO	58				-21310		211	0		35						40631	MALE	Low	Kidney Clear Cell Renal Carcinoma	No	C64.9	8310/3	C64.9	YES				Right	7	G4		0		FALSE	No	M1	N0	T3a	Stage IV
TCGA-BP-4975	TCGA-BP-4975	1433	days	TCGA Kidney Clear Cell Carcinoma (KIRC)	kidney clear cell carcinoma	Kidney					40				-14710			0	1433							40591	MALE	Normal	Kidney Clear Cell Renal Carcinoma	No	C64.9	8310/3	C64.9	YES				Right		G3				FALSE	No	M0	NX	T1b	Stage I
TCGA-BP-4976	TCGA-BP-4976	1632	days	TCGA Kidney Clear Cell Carcinoma (KIRC)	kidney clear cell carcinoma	Kidney					77				-28380			0	1632							40591	MALE	Low	Kidney Clear Cell Renal Carcinoma	No	C64.9	8310/3	C64.9	YES				Right		G3				FALSE	Yes	M0	NX	T1a	Stage I
TCGA-BP-4977	TCGA-BP-4977	454	days	TCGA Kidney Clear Cell Carcinoma (KIRC)	kidney clear cell carcinoma	Kidney					57				-20950			0	454							40591	MALE	Normal	Kidney Clear Cell Renal Carcinoma	No	C64.9	8310/3	C64.9	YES				Left		G3				FALSE	No	M0	NX	T1b	Stage I
TCGA-BP-4981	TCGA-BP-4981	1097	days	TCGA Kidney Clear Cell Carcinoma (KIRC)	kidney clear cell carcinoma	Kidney					75				-27676		1097	0								40591	FEMALE	Normal	Kidney Clear Cell Renal Carcinoma	No	C64.9	8310/3	C64.9	YES				Right		G3				FALSE	No	M0	NX	T3a	Stage III
TCGA-BP-4982	TCGA-BP-4982	1014	days	TCGA Kidney Clear Cell Carcinoma (KIRC)	kidney clear cell carcinoma	Kidney					42				-15451			0	1014							40591	MALE	Low	Kidney Clear Cell Renal Carcinoma	No	C64.9	8310/3	C64.9	YES				Left		G3				FALSE	No	M0	NX	T1b	Stage I
TCGA-BP-4983	TCGA-BP-4983	1413	days	TCGA Kidney Clear Cell Carcinoma (KIRC)	kidney clear cell carcinoma	Kidney					67				-24558			0	1413							40591	FEMALE	Low	Kidney Clear Cell Renal Carcinoma	No	C64.9	8310/3	C64.9	YES				Right		G4				FALSE	No	M0	NX	T3a	Stage III
TCGA-BP-4985	TCGA-BP-4985	952	days	TCGA Kidney Clear Cell Carcinoma (KIRC)	kidney clear cell carcinoma	Kidney	NO	YES	NO	NO	72				-26611		952	0		657						40666	MALE	Normal	Kidney Clear Cell Renal Carcinoma	No	C64.9	8310/3	C64.9	YES				Left	22	G4		0		FALSE	No	M0	N0	T3a	Stage III
TCGA-BP-4986	TCGA-BP-4986	785	days	TCGA Kidney Clear Cell Carcinoma (KIRC)	kidney clear cell carcinoma	Kidney					75				-27612			0	785							40591	MALE	Low	Kidney Clear Cell Renal Carcinoma	Yes	C64.9	8310/3	C64.9	YES				Right	4	G3		0		FALSE	Yes	M0	N0	T1a	Stage I
TCGA-BP-4987	TCGA-BP-4987	1124	days	TCGA Kidney Clear Cell Carcinoma (KIRC)	kidney clear cell carcinoma	Kidney					41				-15041			0	1124							40591	FEMALE	Low	Kidney Clear Cell Renal Carcinoma	No	C64.9	8310/3	C64.9	YES				Left		G2				FALSE	No	M0	NX	T1b	Stage I
TCGA-BP-4988	TCGA-BP-4988	828	days	TCGA Kidney Clear Cell Carcinoma (KIRC)	kidney clear cell carcinoma	Kidney					72				-26576		828	0								40591	MALE	Low	Kidney Clear Cell Renal Carcinoma	No	C64.9	8310/3	C64.9	YES				Right	1	G2		0		FALSE	Yes	M0	N0	T1a	Stage I
TCGA-BP-4989	TCGA-BP-4989	118	days	TCGA Kidney Clear Cell Carcinoma (KIRC)	kidney clear cell carcinoma	Kidney					58				-21382			0	118							40591	MALE	Low	Kidney Clear Cell Renal Carcinoma	No	C64.9	8310/3	C64.9	YES				Right	10	G3		0		FALSE	No	M0	N0	T3a	Stage III
TCGA-BP-4991	TCGA-BP-4991	1413	days	TCGA Kidney Clear Cell Carcinoma (KIRC)	kidney clear cell carcinoma	Kidney					54				-19739			0	1413							40591	MALE	Low	Kidney Clear Cell Renal Carcinoma	No	C64.9	8310/3	C64.9	YES				Right		G2				FALSE	No	M0	NX	T1a	Stage I
TCGA-BP-4992	TCGA-BP-4992	501	days	TCGA Kidney Clear Cell Carcinoma (KIRC)	kidney clear cell carcinoma	Kidney					66				-24438			0	501							40591	MALE	Low	Kidney Clear Cell Renal Carcinoma	No	C64.9	8310/3	C64.9	YES				Left		G4				FALSE	No	M0	NX	T1b	Stage I
TCGA-BP-4993	TCGA-BP-4993	177	days	TCGA Kidney Clear Cell Carcinoma (KIRC)	kidney clear cell carcinoma	Kidney					58				-21407			0	177							40591	MALE	Low	Kidney Clear Cell Renal Carcinoma	No	C64.9	8310/3	C64.9	YES				Left		G3				FALSE	Yes	M0	NX	T1a	Stage I
TCGA-BP-4994	TCGA-BP-4994	1308	days	TCGA Kidney Clear Cell Carcinoma (KIRC)	kidney clear cell carcinoma	Kidney					54				-19946			0	1308							40591	MALE	Low	Kidney Clear Cell Renal Carcinoma	No	C64.9	8310/3	C64.9	YES				Left		G3				FALSE	No	M0	NX	T1a	Stage I
TCGA-BP-4995	TCGA-BP-4995	1371	days	TCGA Kidney Clear Cell Carcinoma (KIRC)	kidney clear cell carcinoma	Kidney					68				-24850			0	1371							40591	MALE	Low	Kidney Clear Cell Renal Carcinoma	No	C64.9	8310/3	C64.9	YES				Right	5	G3		0		FALSE	Yes	M0	N0	T1b	Stage I
TCGA-BP-4998	TCGA-BP-4998	932	days	TCGA Kidney Clear Cell Carcinoma (KIRC)	kidney clear cell carcinoma	Kidney					49				-17997			0	932							40591	MALE	Low	Kidney Clear Cell Renal Carcinoma	No	C64.9	8310/3	C64.9	YES				Right		G3				FALSE	No	M0	NX	T1a	Stage I
TCGA-BP-5000	TCGA-BP-5000	563	days	TCGA Kidney Clear Cell Carcinoma (KIRC)	kidney clear cell carcinoma	Kidney					40				-14868			0	563							40591	MALE	Normal	Kidney Clear Cell Renal Carcinoma	No	C64.9	8310/3	C64.9	YES				Left		G3				FALSE	No	M0	NX	T1b	Stage I
TCGA-BP-5001	TCGA-BP-5001	1177	days	TCGA Kidney Clear Cell Carcinoma (KIRC)	kidney clear cell carcinoma	Kidney					43				-15858			0	1177							40591	FEMALE	Low	Kidney Clear Cell Renal Carcinoma	No	C64.9	8310/3	C64.9	YES				Right		G2				FALSE	No	M0	NX	T1b	Stage I
TCGA-BP-5004	TCGA-BP-5004	1126	days	TCGA Kidney Clear Cell Carcinoma (KIRC)	kidney clear cell carcinoma	Kidney					53				-19383			0	1126							40591	MALE	Low	Kidney Clear Cell Renal Carcinoma	No	C64.9	8310/3	C64.9	YES				Right		G3				FALSE	No	M0	NX	T1a	Stage I
TCGA-BP-5007	TCGA-BP-5007	1140	days	TCGA Kidney Clear Cell Carcinoma (KIRC)	kidney clear cell carcinoma	Kidney					45				-16793			0	1140							40592	MALE	Normal	Kidney Clear Cell Renal Carcinoma	No	C64.9	8310/3	C64.9	YES				Left	10	G2		0		FALSE	No	M0	N0	T2	Stage II
TCGA-BP-5008	TCGA-BP-5008	1071	days	TCGA Kidney Clear Cell Carcinoma (KIRC)	kidney clear cell carcinoma	Kidney					46				-17008			0	1071							40592	MALE	Low	Kidney Clear Cell Renal Carcinoma	No	C64.9	8310/3	C64.9	YES				Right		G2				FALSE	No	M0	NX	T1a	Stage I
TCGA-BP-5009	TCGA-BP-5009	1092	days	TCGA Kidney Clear Cell Carcinoma (KIRC)	kidney clear cell carcinoma	Kidney	NO	YES	NO	NO	52				-19052		1092	0		492						40631	MALE	Low	Kidney Clear Cell Renal Carcinoma	No	C64.9	8310/3	C64.9	YES				Left		G3				FALSE	Yes	M0	NX	T1b	Stage I
TCGA-BP-5010	TCGA-BP-5010	878	days	TCGA Kidney Clear Cell Carcinoma (KIRC)	kidney clear cell carcinoma	Kidney	NO	NO	NO	NO	63				-23130		878	0		781						40658	MALE	Low	Kidney Clear Cell Renal Carcinoma	No	C64.9	8310/3	C64.9	YES				Right	15	G4		0		FALSE	No	M0	N0	T3a	Stage III
TCGA-BP-5168	TCGA-BP-5168	1463	days	TCGA Kidney Clear Cell Carcinoma (KIRC)	kidney clear cell carcinoma	Kidney					75				-27692		1463	0								40592	MALE	Low	Kidney Clear Cell Renal Carcinoma	No	C64.9	8310/3	C64.9	YES			Elevated	Right		G2				FALSE	Yes	M0	NX	T1a	Stage I
TCGA-BP-5169	TCGA-BP-5169	193	days	TCGA Kidney Clear Cell Carcinoma (KIRC)	kidney clear cell carcinoma	Kidney					70				-25615			0	193							40596	MALE	Low	Kidney Clear Cell Renal Carcinoma	No	C64.9	8310/3	C64.9	YES				Left	9	G4		0		FALSE	No	M0	N0	T1b	Stage I
TCGA-BP-5170	TCGA-BP-5170	2412	days	TCGA Kidney Clear Cell Carcinoma (KIRC)	kidney clear cell carcinoma	Kidney					55				-20229			0	2412							40596	MALE	Normal	Kidney Clear Cell Renal Carcinoma	No	C64.9	8310/3	C64.9	YES				Right		G2				FALSE	No	M0	NX	T1a	Stage I
TCGA-BP-5173	TCGA-BP-5173	62	days	TCGA Kidney Clear Cell Carcinoma (KIRC)	kidney clear cell carcinoma	Kidney					75				-27436		62	0								40596	MALE	Low	Kidney Clear Cell Renal Carcinoma	No	C64.9	8310/3	C64.9	YES				Right		G2				FALSE	No	M0	NX	T1a	Stage I
TCGA-BP-5174	TCGA-BP-5174	2257	days	TCGA Kidney Clear Cell Carcinoma (KIRC)	kidney clear cell carcinoma	Kidney					45				-16693			0	2257							40596	FEMALE	Low	Kidney Clear Cell Renal Carcinoma	No	C64.9	8310/3	C64.9	YES				Left		G2				FALSE	No	M0	NX	T1a	Stage I
TCGA-BP-5175	TCGA-BP-5175	932	days	TCGA Kidney Clear Cell Carcinoma (KIRC)	kidney clear cell carcinoma	Kidney					60				-21949			0	932							40596	MALE	Low	Kidney Clear Cell Renal Carcinoma	No	C64.9	8310/3	C64.9	YES				Right		G3				FALSE	No	M0	NX	T1a	Stage I
TCGA-BP-5176	TCGA-BP-5176	1590	days	TCGA Kidney Clear Cell Carcinoma (KIRC)	kidney clear cell carcinoma	Kidney					78				-28727		1590	0								40596	FEMALE	Normal	Kidney Clear Cell Renal Carcinoma	No	C64.9	8310/3	C64.9	YES				Left		G2				FALSE	No	M0	NX	T1a	Stage I
TCGA-BP-5177	TCGA-BP-5177	293	days	TCGA Kidney Clear Cell Carcinoma (KIRC)	kidney clear cell carcinoma	Kidney					46				-17147			0	293							40596	FEMALE	Low	Kidney Clear Cell Renal Carcinoma	No	C64.9	8310/3	C64.9	YES			Elevated	Right		G3				FALSE	No	M0	NX	T1a	Stage I
TCGA-BP-5178	TCGA-BP-5178	1912	days	TCGA Kidney Clear Cell Carcinoma (KIRC)	kidney clear cell carcinoma	Kidney	NO	NO	NO	NO	71				-26070		1912	0		1709						40633	MALE	Low	Kidney Clear Cell Renal Carcinoma	No	C64.9	8310/3	C64.9	YES			Elevated	Right	2	G4		0		FALSE	Yes	M1	NX	T3a	Stage IV
TCGA-BP-5180	TCGA-BP-5180	2263	days	TCGA Kidney Clear Cell Carcinoma (KIRC)	kidney clear cell carcinoma	Kidney					53				-19413			0	2263							40596	MALE	Low	Kidney Clear Cell Renal Carcinoma	No	C64.9	8310/3	C64.9	YES				Right		G2				FALSE	No	M0	NX	T1a	Stage I
TCGA-BP-5181	TCGA-BP-5181	1495	days	TCGA Kidney Clear Cell Carcinoma (KIRC)	kidney clear cell carcinoma	Kidney					58				-21514			0	1495							40596	FEMALE	Low	Kidney Clear Cell Renal Carcinoma	No	C64.9	8310/3	C64.9	YES				Left		G2				FALSE	Yes	M0	NX	T1b	Stage I
TCGA-BP-5182	TCGA-BP-5182	1165	days	TCGA Kidney Clear Cell Carcinoma (KIRC)	kidney clear cell carcinoma	Kidney					56				-20597			0	1165							40596	MALE	Normal	Kidney Clear Cell Renal Carcinoma	No	C64.9	8310/3	C64.9	YES				Left	1	G3		0		FALSE	No	M0	N0	T1a	Stage I
TCGA-BP-5183	TCGA-BP-5183	1291	days	TCGA Kidney Clear Cell Carcinoma (KIRC)	kidney clear cell carcinoma	Kidney	NO	NO	NO	YES	57			522	-20881			0	1291	485						40633	MALE	Normal	Kidney Clear Cell Renal Carcinoma	No	C64.9	8310/3	C64.9	YES				Left		G3				FALSE	No	M0	NX	T3a	Stage III
TCGA-BP-5184	TCGA-BP-5184	1133	days	TCGA Kidney Clear Cell Carcinoma (KIRC)	kidney clear cell carcinoma	Kidney					54				-19746			0	1133							40596	MALE	Low	Kidney Clear Cell Renal Carcinoma	No	C64.9	8310/3	C64.9	YES				Left		G3				FALSE	No	M0	NX	T1a	Stage I
TCGA-BP-5185	TCGA-BP-5185	1132	days	TCGA Kidney Clear Cell Carcinoma (KIRC)	kidney clear cell carcinoma	Kidney	NO	NO	NO		56				-20470			0	1132	736						40596	MALE	Low	Kidney Clear Cell Renal Carcinoma	No	C64.9	8310/3	C64.9	YES				Right		G3				FALSE	No	M0	NX	T1a	Stage I
TCGA-BP-5186	TCGA-BP-5186	693	days	TCGA Kidney Clear Cell Carcinoma (KIRC)	kidney clear cell carcinoma	Kidney					50				-18348			0	693							40596	FEMALE	Low	Kidney Clear Cell Renal Carcinoma	No	C64.9	8310/3	C64.9	YES				Right	1	G2		0		FALSE	No	M0	N0	T1a	Stage I
TCGA-BP-5187	TCGA-BP-5187	406	days	TCGA Kidney Clear Cell Carcinoma (KIRC)	kidney clear cell carcinoma	Kidney					54				-19999			0	406							40596	MALE	Low	Kidney Clear Cell Renal Carcinoma	No	C64.9	8310/3	C64.9	YES				Right		G2				FALSE	No	M0	NX	T1a	Stage I
TCGA-BP-5189	TCGA-BP-5189	822	days	TCGA Kidney Clear Cell Carcinoma (KIRC)	kidney clear cell carcinoma	Kidney	YES	NO	NO	NO	60				-22156		822	0		781						40632	MALE	Low	Kidney Clear Cell Renal Carcinoma	No	C64.9	8310/3	C64.9	YES				Right		G4				FALSE	Yes	M0	NX	T1b	Stage I
TCGA-BP-5190	TCGA-BP-5190	1011	days	TCGA Kidney Clear Cell Carcinoma (KIRC)	kidney clear cell carcinoma	Kidney					61				-22285			0	1011							40596	MALE	Low	Kidney Clear Cell Renal Carcinoma	No	C64.9	8310/3	C64.9	YES				Right		G3				FALSE	No	M0	NX	T1a	Stage I
TCGA-BP-5191	TCGA-BP-5191	967	days	TCGA Kidney Clear Cell Carcinoma (KIRC)	kidney clear cell carcinoma	Kidney					79				-29207			0	967							40596	MALE	Low	Kidney Clear Cell Renal Carcinoma	No	C64.9	8310/3	C64.9	YES				Left	1	G2		0		FALSE	Yes	M0	N0	T3a	Stage III
TCGA-BP-5192	TCGA-BP-5192	714	days	TCGA Kidney Clear Cell Carcinoma (KIRC)	kidney clear cell carcinoma	Kidney					59				-21891			0	714							40596	MALE	Normal	Kidney Clear Cell Renal Carcinoma	No	C64.9	8310/3	C64.9	YES				Right		G2				FALSE	No	M0	NX	T1a	Stage I
TCGA-BP-5194	TCGA-BP-5194	408	days	TCGA Kidney Clear Cell Carcinoma (KIRC)	kidney clear cell carcinoma	Kidney					39				-14551			0	408							40596	MALE	Normal	Kidney Clear Cell Renal Carcinoma	No	C64.9	8310/3	C64.9	YES				Right		G2				FALSE	No	M0	NX	T1a	Stage I
TCGA-BP-5195	TCGA-BP-5195	749	days	TCGA Kidney Clear Cell Carcinoma (KIRC)	kidney clear cell carcinoma	Kidney					75				-27547			0	749							40597	MALE	Low	Kidney Clear Cell Renal Carcinoma	No	C64.9	8310/3	C64.9	YES				Left		G2				FALSE	No	M0	NX	T1a	Stage I
TCGA-BP-5196	TCGA-BP-5196	1018	days	TCGA Kidney Clear Cell Carcinoma (KIRC)	kidney clear cell carcinoma	Kidney					53				-19719			0	1018							40597	MALE	Low	Kidney Clear Cell Renal Carcinoma	No	C64.9	8310/3	C64.9	YES				Left		G2				FALSE	No	M0	NX	T1a	Stage I
TCGA-BP-5198	TCGA-BP-5198	603	days	TCGA Kidney Clear Cell Carcinoma (KIRC)	kidney clear cell carcinoma	Kidney					72				-26360			0	603				Elevated			40597	MALE	Low	Kidney Clear Cell Renal Carcinoma	No	C64.9	8310/3	C64.9	YES				Right	9	G3		0		FALSE	No	M0	N0	T3b	Stage III
TCGA-BP-5199	TCGA-BP-5199	1355	days	TCGA Kidney Clear Cell Carcinoma (KIRC)	kidney clear cell carcinoma	Kidney					58				-21256			0	1355							40632	MALE	Low	Kidney Clear Cell Renal Carcinoma	No	C64.9	8310/3	C64.9	YES				Left	4	G4		0		FALSE	Yes	M0	N0	T2	Stage II
TCGA-BP-5200	TCGA-BP-5200	1063	days	TCGA Kidney Clear Cell Carcinoma (KIRC)	kidney clear cell carcinoma	Kidney			NO	NO	44				-16197			0	1063							40659	MALE	Low	Kidney Clear Cell Renal Carcinoma	No	C64.9	8310/3	C64.9	YES				Right		G4				FALSE	No	M0	NX	T2	Stage II
TCGA-BP-5201	TCGA-BP-5201	951	days	TCGA Kidney Clear Cell Carcinoma (KIRC)	kidney clear cell carcinoma	Kidney	YES	NO	NO	YES	63			470	-23125			0	951	-19						40632	MALE	Low	Kidney Clear Cell Renal Carcinoma	No	C64.9	8310/3	C64.9	YES				Left	4	G4		0		FALSE	Yes	M1	N0	T3b	Stage IV
TCGA-BP-5202	TCGA-BP-5202	29	days	TCGA Kidney Clear Cell Carcinoma (KIRC)	kidney clear cell carcinoma	Kidney					75				-27556			0	29							40597	MALE	Low	Kidney Clear Cell Renal Carcinoma	No	C64.9	8310/3	C64.9	YES				Right		G2				FALSE	No	M0	NX	T3a	Stage III
TCGA-CJ-4634	TCGA-CJ-4634	3498	days	TCGA Kidney Clear Cell Carcinoma (KIRC)	kidney clear cell carcinoma	Kidney					60				-22155			0	3498					Scheduled Follow-up Submission	Complete Remission/Response	42094	FEMALE	Normal	Kidney Clear Cell Renal Carcinoma	No	C64.9	8310/3	C64.9	YES				Right		G2				FALSE	No	M0	NX	T1b	Stage I
TCGA-CJ-4635	TCGA-CJ-4635	1416	days	TCGA Kidney Clear Cell Carcinoma (KIRC)	kidney clear cell carcinoma	Kidney					48				-17620			0	1416			0				40546	MALE	Normal	Kidney Clear Cell Renal Carcinoma	No	C64.9	8310/3	C64.9	YES			Elevated	Left		G3				FALSE	No	M0	NX	T1b	Stage I
TCGA-CJ-4636	TCGA-CJ-4636	1924	days	TCGA Kidney Clear Cell Carcinoma (KIRC)	kidney clear cell carcinoma	Kidney					51				-18878			0	1924			0				40546	MALE	Normal	Kidney Clear Cell Renal Carcinoma	No	C64.9	8310/3	C64.9	YES			Normal	Right	4	G3		0		FALSE	Yes	M0	N0	T3a	Stage III
TCGA-CJ-4637	TCGA-CJ-4637	2227	days	TCGA Kidney Clear Cell Carcinoma (KIRC)	kidney clear cell carcinoma	Kidney	YES	YES	NO	NO	52				-19101		2227	0		1821		2				40567	FEMALE	Low	Kidney Clear Cell Renal Carcinoma	No	C64.9	8310/3	C64.9	YES			Normal	Left		G4				FALSE	No	M1	NX	T2b	Stage IV
TCGA-CJ-4638	TCGA-CJ-4638	431	days	TCGA Kidney Clear Cell Carcinoma (KIRC)	kidney clear cell carcinoma	Kidney	YES	YES	NO	NO	46				-17110		431	0		70		0				40567	FEMALE	Low	Kidney Clear Cell Renal Carcinoma	No	C64.9	8310/3	C64.9	YES			Normal	Left	3	G4		2		FALSE	No	M1	N1	T3a	Stage IV
TCGA-CJ-4639	TCGA-CJ-4639	3229	days	TCGA Kidney Clear Cell Carcinoma (KIRC)	kidney clear cell carcinoma	Kidney					49				-18066			0	3229			0		Scheduled Follow-up Submission	Complete Remission/Response	42094	FEMALE	Normal	Kidney Clear Cell Renal Carcinoma	No	C64.9	8310/3	C64.9	YES				Left		G2	NO			FALSE	No	M0	N0	T2	Stage II
TCGA-CJ-4640	TCGA-CJ-4640	3480	days	TCGA Kidney Clear Cell Carcinoma (KIRC)	kidney clear cell carcinoma	Kidney					49				-18178			0	3480			0		Scheduled Follow-up Submission	Complete Remission/Response	42094	MALE	Normal	Kidney Clear Cell Renal Carcinoma	No	C64.9	8310/3	C64.9	YES				Left		G4	NO			FALSE	No	M0	N0	T3a	Stage III
TCGA-CJ-4641	TCGA-CJ-4641	1661	days	TCGA Kidney Clear Cell Carcinoma (KIRC)	kidney clear cell carcinoma	Kidney	YES	NO	NO	NO	55				-20410		1661	0		-359		0				40567	FEMALE	Normal	Kidney Clear Cell Renal Carcinoma	No	C64.9	8310/3	C64.9	YES			Normal	Left		G4				FALSE	No	M1	NX	T3a	Stage IV
TCGA-CJ-4642	TCGA-CJ-4642	3205	days	TCGA Kidney Clear Cell Carcinoma (KIRC)	kidney clear cell carcinoma	Kidney					47				-17367			0	3205					Scheduled Follow-up Submission	Complete Remission/Response	42094	MALE	Low	Kidney Clear Cell Renal Carcinoma	Yes	C64.9	8310/3	C64.9	YES				Right		G2	NO			FALSE	No	M0	NX	T2	Stage II
TCGA-CJ-4643	TCGA-CJ-4643	1793	days	TCGA Kidney Clear Cell Carcinoma (KIRC)	kidney clear cell carcinoma	Kidney					67				-24477			0	1793			0				40546	FEMALE	Low	Kidney Clear Cell Renal Carcinoma	No	C64.9	8310/3	C64.9	YES			Normal	Right		G3				FALSE	No	M0	N0	T2b	Stage II
TCGA-CJ-4644	TCGA-CJ-4644	336	days	TCGA Kidney Clear Cell Carcinoma (KIRC)	kidney clear cell carcinoma	Kidney	YES	YES	YES	YES	48		105	105	-17882		336	0		93		2				40567	FEMALE	Low	Kidney Clear Cell Renal Carcinoma	No	C64.9	8310/3	C64.9	YES				Left		G3				FALSE	No	M1	N0	T3a	Stage IV
TCGA-CJ-4869	TCGA-CJ-4869	2554	days	TCGA Kidney Clear Cell Carcinoma (KIRC)	kidney clear cell carcinoma	Kidney	YES	NO	NO	NO	49				-17923			0	2554	1754		0				40582	MALE	Normal	Kidney Clear Cell Renal Carcinoma	No	C64.9	8310/3	C64.9	YES				Right	10	G2		3		FALSE	No	M0	N1	T2	Stage III
TCGA-CJ-4870	TCGA-CJ-4870	1498	days	TCGA Kidney Clear Cell Carcinoma (KIRC)	kidney clear cell carcinoma	Kidney					58				-21340			0	1498			0		Scheduled Follow-up Submission		42094	FEMALE	Normal	Kidney Clear Cell Renal Carcinoma	No	C64.9	8310/3	C64.9	YES			Normal	Left		G2				FALSE	No	M0	NX	T3a	Stage III
TCGA-CJ-4871	TCGA-CJ-4871	2423	days	TCGA Kidney Clear Cell Carcinoma (KIRC)	kidney clear cell carcinoma	Kidney	YES	YES		YES	63			-43	-23195			0	2423	169		0				40567	MALE	Low	Kidney Clear Cell Renal Carcinoma	No	C64.9	8310/3	C64.9	YES			Normal	Left		G4				FALSE	No	M1	NX	T3a	Stage IV
TCGA-CJ-4872	TCGA-CJ-4872	326	days	TCGA Kidney Clear Cell Carcinoma (KIRC)	kidney clear cell carcinoma	Kidney	NO	NO			51				-18862			0	326			0				40567	MALE	Normal	Kidney Clear Cell Renal Carcinoma	No	C64.9	8310/3	C64.9	YES			Normal	Right	1	G4		0		FALSE	No	M0	N0	T1b	Stage I
TCGA-CJ-4873	TCGA-CJ-4873	2259	days	TCGA Kidney Clear Cell Carcinoma (KIRC)	kidney clear cell carcinoma	Kidney	NO	NO			85				-31096			0	2259			0				40567	FEMALE	Normal	Kidney Clear Cell Renal Carcinoma	No	C64.9	8310/3	C64.9	YES			Normal	Right	3	G3		0		FALSE	No	M0	N0	T3a	Stage III
TCGA-CJ-4875	TCGA-CJ-4875	3554	days	TCGA Kidney Clear Cell Carcinoma (KIRC)	kidney clear cell carcinoma	Kidney					67				-24510		3554	0	2353	531		0		Scheduled Follow-up Submission	Progressive Disease	42094	MALE	Low	Kidney Clear Cell Renal Carcinoma	No	C64.9	8310/3	C64.9	YES				Right		G3	YES			FALSE	No	M1	NX	T3a	Stage IV
TCGA-CJ-4876	TCGA-CJ-4876	1955	days	TCGA Kidney Clear Cell Carcinoma (KIRC)	kidney clear cell carcinoma	Kidney	NO	NO			57				-20993			0	1955			0				40567	MALE	Low	Kidney Clear Cell Renal Carcinoma	No	C64.9	8310/3	C64.9	YES			Normal	Left		G3				FALSE	No	M0	N0	T2b	Stage II
TCGA-CJ-4878	TCGA-CJ-4878	2186	days	TCGA Kidney Clear Cell Carcinoma (KIRC)	kidney clear cell carcinoma	Kidney	NO	NO	NO	NO	71				-26224			0	2186			0				40571	FEMALE	Normal	Kidney Clear Cell Renal Carcinoma	No	C64.9	8310/3	C64.9	YES			Normal	Left		G2				FALSE	No	M0	NX	T3a	Stage III
TCGA-CJ-4881	TCGA-CJ-4881	2014	days	TCGA Kidney Clear Cell Carcinoma (KIRC)	kidney clear cell carcinoma	Kidney	YES	YES	NO	NO	41				-15197			0	2014	1881		1				40571	MALE	Normal	Kidney Clear Cell Renal Carcinoma	No	C64.9	8310/3	C64.9	YES			Normal	Right		G3				FALSE	No	M0	NX	T3a	Stage III
TCGA-CJ-4882	TCGA-CJ-4882	1883	days	TCGA Kidney Clear Cell Carcinoma (KIRC)	kidney clear cell carcinoma	Kidney	NO	NO	NO	NO	57				-21074			0	1883			0				40582	MALE	Low	Kidney Clear Cell Renal Carcinoma	No	C64.9	8310/3	C64.9	YES			Normal	Right	2	G3		0		FALSE	No	M0	NX	T3a	Stage III
TCGA-CJ-4884	TCGA-CJ-4884	1759	days	TCGA Kidney Clear Cell Carcinoma (KIRC)	kidney clear cell carcinoma	Kidney	NO	NO	NO	NO	72				-26475			0	1759			0				40571	FEMALE	Normal	Kidney Clear Cell Renal Carcinoma	No	C64.9	8310/3	C64.9	YES				Right		G3				FALSE	No	M0	NX	T3a	Stage III
TCGA-CJ-4885	TCGA-CJ-4885	3451	days	TCGA Kidney Clear Cell Carcinoma (KIRC)	kidney clear cell carcinoma	Kidney					64				-23437			0	3451			0		Scheduled Follow-up Submission		42094	MALE	Low	Kidney Clear Cell Renal Carcinoma	No	C64.9	8310/3	C64.9	YES			Normal	Right		G3				FALSE	No	M1	NX	T3a	Stage IV
TCGA-CJ-4886	TCGA-CJ-4886	1952	days	TCGA Kidney Clear Cell Carcinoma (KIRC)	kidney clear cell carcinoma	Kidney	NO	NO	NO	NO	42				-15698			0	1952			0				40571	FEMALE	Normal	Kidney Clear Cell Renal Carcinoma	No	C64.9	8310/3	C64.9	YES			Normal	Left		G3				FALSE	No	M0	NX	T1a	Stage I
TCGA-CJ-4887	TCGA-CJ-4887	932	days	TCGA Kidney Clear Cell Carcinoma (KIRC)	kidney clear cell carcinoma	Kidney	YES	NO	NO	NO	48				-17611		932	0		322		0				40571	MALE	Normal	Kidney Clear Cell Renal Carcinoma	No	C64.9	8310/3	C64.9	YES			Normal	Right		G3				FALSE	No	M1	NX	T3a	Stage IV
TCGA-CJ-4888	TCGA-CJ-4888	1567	days	TCGA Kidney Clear Cell Carcinoma (KIRC)	kidney clear cell carcinoma	Kidney	YES	NO	YES	YES	59		460	608	-21701		1567	0		608		1				40571	MALE	Low	Kidney Clear Cell Renal Carcinoma	No	C64.9	8310/3	C64.9	YES				Left		G4				FALSE	No	M1	NX	T3a	Stage IV
TCGA-CJ-4889	TCGA-CJ-4889	1946	days	TCGA Kidney Clear Cell Carcinoma (KIRC)	kidney clear cell carcinoma	Kidney	NO	NO	NO	NO	63				-23051			0	1946			0				40571	FEMALE	Normal	Kidney Clear Cell Renal Carcinoma	No	C64.9	8310/3	C64.9	YES				Left	1	G4		0		FALSE	No	M0	NX	T1a	Stage I
TCGA-CJ-4890	TCGA-CJ-4890	3519	days	TCGA Kidney Clear Cell Carcinoma (KIRC)	kidney clear cell carcinoma	Kidney					72				-26604			0	3519	70		0		Scheduled Follow-up Submission	Complete Remission/Response	42094	MALE	Low	Kidney Clear Cell Renal Carcinoma	No	C64.9	8310/3	C64.9	YES			Elevated	Left	1	G4	YES	0		FALSE	No	M1	N0	T3a	Stage IV
TCGA-CJ-4891	TCGA-CJ-4891	819	days	TCGA Kidney Clear Cell Carcinoma (KIRC)	kidney clear cell carcinoma	Kidney	NO	NO	NO	NO	57				-21059		819	0				0				40571	FEMALE	Low	Kidney Clear Cell Renal Carcinoma	No	C64.9	8310/3	C64.9	YES			Normal	Left	5	G4		0		FALSE	Yes	M0	N0	T3c	Stage III
TCGA-CJ-4892	TCGA-CJ-4892	1521	days	TCGA Kidney Clear Cell Carcinoma (KIRC)	kidney clear cell carcinoma	Kidney	NO	NO	NO	NO	65				-23764			0	1521			0				40571	FEMALE	Normal	Kidney Clear Cell Renal Carcinoma	No	C64.9	8310/3	C64.9	YES			Normal	Right	2	G2		0		FALSE	No	M0	N0	T1b	Stage I
TCGA-CJ-4893	TCGA-CJ-4893	750	days	TCGA Kidney Clear Cell Carcinoma (KIRC)	kidney clear cell carcinoma	Kidney	NO	NO	NO	NO	76				-27885			0	750			0				40571	FEMALE	Normal	Kidney Clear Cell Renal Carcinoma	No	C64.9	8310/3	C64.9	YES			Normal	Right		G3				FALSE	No	M0	NX	T1b	Stage I
TCGA-CJ-4894	TCGA-CJ-4894	841	days	TCGA Kidney Clear Cell Carcinoma (KIRC)	kidney clear cell carcinoma	Kidney	YES	NO	NO	NO	58				-21524		841	0	841	158		0				40571	MALE	Low	Kidney Clear Cell Renal Carcinoma	No	C64.9	8310/3	C64.9	YES				Left	3	G3		0		FALSE	Yes	M0	N0	T3a	Stage III
TCGA-CJ-4895	TCGA-CJ-4895	1200	days	TCGA Kidney Clear Cell Carcinoma (KIRC)	kidney clear cell carcinoma	Kidney	YES	NO	NO	NO	62				-22892		1200	0		61		0				40571	MALE	Low	Kidney Clear Cell Renal Carcinoma	No	C64.9	8310/3	C64.9	YES			Normal	Left		G4				FALSE	No	M1	NX	T3a	Stage IV
TCGA-CJ-4897	TCGA-CJ-4897	3341	days	TCGA Kidney Clear Cell Carcinoma (KIRC)	kidney clear cell carcinoma	Kidney	NO	NO	NO	NO	79				-29124			0	3341	1423		0		Scheduled Follow-up Submission	Stable Disease	42094	FEMALE	Normal	Kidney Clear Cell Renal Carcinoma	No	C64.9	8310/3	C64.9	YES				Right		G3	YES			FALSE	No	M0	NX	T3a	Stage III
TCGA-CJ-4899	TCGA-CJ-4899	1528	days	TCGA Kidney Clear Cell Carcinoma (KIRC)	kidney clear cell carcinoma	Kidney	NO	NO	NO	NO	42				-15637			0	1528			0				40571	MALE	Normal	Kidney Clear Cell Renal Carcinoma	No	C64.9	8310/3	C64.9	YES				Left		G2				FALSE	No	M0	NX	T1b	Stage I
TCGA-CJ-4900	TCGA-CJ-4900	1714	days	TCGA Kidney Clear Cell Carcinoma (KIRC)	kidney clear cell carcinoma	Kidney	YES	NO	NO	NO	69				-25508		1714	0				0				40571	FEMALE	Low	Kidney Clear Cell Renal Carcinoma	Yes	C64.9	8310/3	C64.9	YES			Normal	Left	14	G4		1		FALSE	No	M1	N1	T4	Stage IV
TCGA-CJ-4901	TCGA-CJ-4901	1450	days	TCGA Kidney Clear Cell Carcinoma (KIRC)	kidney clear cell carcinoma	Kidney	NO	NO	NO	NO	47				-17396			0	1450			0				40582	MALE	Low	Kidney Clear Cell Renal Carcinoma	No	C64.9	8310/3	C64.9	YES			Normal	Right		G3				FALSE	No	M0	NX	T3b	Stage III
TCGA-CJ-4902	TCGA-CJ-4902	1520	days	TCGA Kidney Clear Cell Carcinoma (KIRC)	kidney clear cell carcinoma	Kidney	NO	NO	NO	NO	61				-22424			0	1520			0				40582	MALE	Normal	Kidney Clear Cell Renal Carcinoma	No	C64.9	8310/3	C64.9	YES			Normal	Right		G3				FALSE	No	M0	NX	T3a	Stage III
TCGA-CJ-4903	TCGA-CJ-4903	1559	days	TCGA Kidney Clear Cell Carcinoma (KIRC)	kidney clear cell carcinoma	Kidney	NO	NO	NO	NO	50				-18510			0	1559			0				40217	MALE	Normal	Kidney Clear Cell Renal Carcinoma	No	C64.9	8310/3	C64.9	YES			Normal	Left		G3				FALSE	No	M0	NX	T1b	Stage I
TCGA-CJ-4904	TCGA-CJ-4904	3302	days	TCGA Kidney Clear Cell Carcinoma (KIRC)	kidney clear cell carcinoma	Kidney					60				-22036			0	3302	278		0		Scheduled Follow-up Submission	Stable Disease	42094	FEMALE	Normal	Kidney Clear Cell Renal Carcinoma	No	C64.9	8310/3	C64.9	YES			Normal	Left	13	G3	YES	0		FALSE	Yes	M1	N0	T3a	Stage IV
TCGA-CJ-4905	TCGA-CJ-4905	1496	days	TCGA Kidney Clear Cell Carcinoma (KIRC)	kidney clear cell carcinoma	Kidney	NO	NO	NO	NO	62				-22864			0	1496			0				40582	FEMALE	Normal	Kidney Clear Cell Renal Carcinoma	No	C64.9	8310/3	C64.9	YES				Right		G2				FALSE	No	M0	NX	T1a	Stage I
TCGA-CJ-4907	TCGA-CJ-4907	1499	days	TCGA Kidney Clear Cell Carcinoma (KIRC)	kidney clear cell carcinoma	Kidney	NO	NO	NO	NO	58				-21208			0	1499			0				40582	MALE	Low	Kidney Clear Cell Renal Carcinoma	No	C64.9	8310/3	C64.9	YES			Normal	Right		G3				FALSE	No	M0	NX	T3b	Stage III
TCGA-CJ-4908	TCGA-CJ-4908	1531	days	TCGA Kidney Clear Cell Carcinoma (KIRC)	kidney clear cell carcinoma	Kidney	NO	NO	NO	NO	38				-14226			0	1531			0				40582	MALE	Normal	Kidney Clear Cell Renal Carcinoma	No	C64.9	8310/3	C64.9	YES			Normal	Right		G2				FALSE	No	M0	NX	T1a	Stage I
TCGA-CJ-4912	TCGA-CJ-4912	1657	days	TCGA Kidney Clear Cell Carcinoma (KIRC)	kidney clear cell carcinoma	Kidney	NO	NO	NO	NO	61				-22623			0	1657			0				40582	MALE		Kidney Clear Cell Renal Carcinoma	No	C64.9	8310/3	C64.9	YES				Left		G3				FALSE	No	M0	NX	T2	Stage II
TCGA-CJ-4916	TCGA-CJ-4916	1373	days	TCGA Kidney Clear Cell Carcinoma (KIRC)	kidney clear cell carcinoma	Kidney	NO	NO	NO	NO	69				-25470			0	1373			0				40582	FEMALE		Kidney Clear Cell Renal Carcinoma	No	C64.9	8310/3	C64.9	YES				Right		G3				FALSE	No	M0	NX	T3a	Stage III
TCGA-CJ-4918	TCGA-CJ-4918	93	days	TCGA Kidney Clear Cell Carcinoma (KIRC)	kidney clear cell carcinoma	Kidney	YES	NO	NO	NO	64				-23379		93	0		33		0				40583	MALE	Normal	Kidney Clear Cell Renal Carcinoma	No	C64.9	8310/3	C64.9	YES			Normal	Left	1	G4		0		FALSE	No	M1	N0	T3a	Stage IV
TCGA-CJ-4920	TCGA-CJ-4920	139	days	TCGA Kidney Clear Cell Carcinoma (KIRC)	kidney clear cell carcinoma	Kidney	NO	NO	NO	NO	64				-23656		139	0				0				40582	FEMALE	Normal	Kidney Clear Cell Renal Carcinoma	No	C64.9	8310/3	C64.9	YES			Normal	Left		G2				FALSE	No	M0	NX	T1b	Stage I
TCGA-CJ-4923	TCGA-CJ-4923	572	days	TCGA Kidney Clear Cell Carcinoma (KIRC)	kidney clear cell carcinoma	Kidney	YES	NO	NO	NO	63				-23353		572	0		25		0				40583	FEMALE	Normal	Kidney Clear Cell Renal Carcinoma	No	C64.9	8310/3	C64.9	YES			Normal	Left		G4				FALSE	No	M1	NX	T3a	Stage IV
TCGA-CJ-5671	TCGA-CJ-5671	3987	days	TCGA Kidney Clear Cell Carcinoma (KIRC)	kidney clear cell carcinoma	Kidney					51				-18954			0	3987			0		Scheduled Follow-up Submission	Complete Remission/Response	42094	MALE	Normal	Kidney Clear Cell Renal Carcinoma	No	C64.9	8310/3	C64.9	YES			Normal	Left		G3	NO			FALSE	No	M0	NX	T1a	Stage I
TCGA-CJ-5672	TCGA-CJ-5672	2190	days	TCGA Kidney Clear Cell Carcinoma (KIRC)	kidney clear cell carcinoma	Kidney					84				-30900		2190	0				0				40659	MALE	Normal	Kidney Clear Cell Renal Carcinoma	No	C64.9	8310/3	C64.9	YES			Normal	Left		G3				FALSE	No	M0	NX	T1a	Stage I
TCGA-CJ-5675	TCGA-CJ-5675	3936	days	TCGA Kidney Clear Cell Carcinoma (KIRC)	kidney clear cell carcinoma	Kidney	YES	NO			70				-25617			0	3936	900		0		Scheduled Follow-up Submission	Stable Disease	42094	MALE	Normal	Kidney Clear Cell Renal Carcinoma	No	C64.9	8310/3	C64.9	YES			Normal	Right		G3	YES			FALSE	No	M0	NX	T2a	Stage II
TCGA-CJ-5676	TCGA-CJ-5676	4067	days	TCGA Kidney Clear Cell Carcinoma (KIRC)	kidney clear cell carcinoma	Kidney	YES	YES			47				-17170			0	4067	2219		0		Scheduled Follow-up Submission	Progressive Disease	42094	MALE	Normal	Kidney Clear Cell Renal Carcinoma	No	C64.9	8310/3	C64.9	YES			Normal	Right		G3	YES			FALSE	No	M0	NX	T3b	Stage III
TCGA-CJ-5677	TCGA-CJ-5677	782	days	TCGA Kidney Clear Cell Carcinoma (KIRC)	kidney clear cell carcinoma	Kidney	YES	NO	NO	YES	54			278	-19849		782	0		288		1				40659	FEMALE	Low	Kidney Clear Cell Renal Carcinoma	No	C64.9	8310/3	C64.9	YES			Normal	Right		G4				FALSE	No	M1	NX	T3a	Stage IV
TCGA-CJ-5678	TCGA-CJ-5678	574	days	TCGA Kidney Clear Cell Carcinoma (KIRC)	kidney clear cell carcinoma	Kidney	YES	NO	YES	NO	62		399		-22944		574	0		399		1				40659	MALE	Normal	Kidney Clear Cell Renal Carcinoma	No	C64.9	8310/3	C64.9	YES				Left	1	G3		0		FALSE	No	M1	N0	T2b	Stage IV
TCGA-CJ-5679	TCGA-CJ-5679	679	days	TCGA Kidney Clear Cell Carcinoma (KIRC)	kidney clear cell carcinoma	Kidney	YES	YES	YES	NO	73		595		-26858		679	0		595		1				40659	MALE	Low	Kidney Clear Cell Renal Carcinoma	No	C64.9	8310/3	C64.9	YES			Normal	Left		G4				FALSE	No	M0	NX	T3b	Stage III
TCGA-CJ-5680	TCGA-CJ-5680	768	days	TCGA Kidney Clear Cell Carcinoma (KIRC)	kidney clear cell carcinoma	Kidney	YES	YES	NO	NO	65				-23778		768	0		153		1				40659	FEMALE	Normal	Kidney Clear Cell Renal Carcinoma	No	C64.9	8310/3	C64.9	YES			Normal	Right		G4				FALSE	No	M1	NX	T3a	Stage IV
TCGA-CJ-5681	TCGA-CJ-5681	552	days	TCGA Kidney Clear Cell Carcinoma (KIRC)	kidney clear cell carcinoma	Kidney	YES	YES	NO	NO	44				-16121		552	0		17		0				40659	FEMALE	Low	Kidney Clear Cell Renal Carcinoma	No	C64.9	8310/3	C64.9	YES			Elevated	Left		G3				FALSE	No	M1	NX	T3a	Stage IV
TCGA-CJ-5682	TCGA-CJ-5682	3736	days	TCGA Kidney Clear Cell Carcinoma (KIRC)	kidney clear cell carcinoma	Kidney					60				-22244			0	3736			0		Scheduled Follow-up Submission	Stable Disease	42094	MALE	Normal	Kidney Clear Cell Renal Carcinoma	No	C64.9	8310/3	C64.9	YES			Normal	Left		G4	NO			FALSE	No	M1	NX	T3a	Stage IV
TCGA-CJ-5683	TCGA-CJ-5683	1889	days	TCGA Kidney Clear Cell Carcinoma (KIRC)	kidney clear cell carcinoma	Kidney	NO	NO	NO	NO	78				-28745			0	1889			0				40659	MALE	Low	Kidney Clear Cell Renal Carcinoma	No	C64.9	8310/3	C64.9	YES				Right		G3				FALSE	No	M0	NX	T1b	Stage I
TCGA-CJ-5684	TCGA-CJ-5684	2231	days	TCGA Kidney Clear Cell Carcinoma (KIRC)	kidney clear cell carcinoma	Kidney	NO	NO	NO	NO	61				-22561			0	2231			0				40659	MALE	Low	Kidney Clear Cell Renal Carcinoma	No	C64.9	8310/3	C64.9	YES				Right		G2				FALSE	No	M0	NX	T3a	Stage III
TCGA-CJ-5686	TCGA-CJ-5686	2038	days	TCGA Kidney Clear Cell Carcinoma (KIRC)	kidney clear cell carcinoma	Kidney	NO	NO	NO	NO	59				-21836			0	2038			0				40659	FEMALE	Normal	Kidney Clear Cell Renal Carcinoma	No	C64.9	8310/3	C64.9	YES				Left		G3				FALSE	No	M0	NX	T1b	Stage I
TCGA-CJ-5689	TCGA-CJ-5689	1620	days	TCGA Kidney Clear Cell Carcinoma (KIRC)	kidney clear cell carcinoma	Kidney	NO	NO	NO	NO	90				-32872		1620	0								40647	MALE	Low	Kidney Clear Cell Renal Carcinoma	No	C64.9	8310/3	C64.9	YES				Left		G4				FALSE	Yes	M0	NX	T1b	Stage I
TCGA-CJ-6027	TCGA-CJ-6027	3615	days	TCGA Kidney Clear Cell Carcinoma (KIRC)	kidney clear cell carcinoma	Kidney					77				-28359		3615	0	1855			0		Scheduled Follow-up Submission	Complete Remission/Response	42094	MALE	Low	Kidney Clear Cell Renal Carcinoma	No	C64.9	8310/3	C64.9	YES			Normal	Right		G4	NO			FALSE	Yes	M0	NX	T1a	Stage I
TCGA-CJ-6028	TCGA-CJ-6028	1625	days	TCGA Kidney Clear Cell Carcinoma (KIRC)	kidney clear cell carcinoma	Kidney	YES	YES	NO	YES	58			150	-21380		1625	0		137		1				40745	MALE	Low	Kidney Clear Cell Renal Carcinoma	No	C64.9	8310/3	C64.9	YES		90	Normal	Left		G4				FALSE	No	M1	NX	T3a	Stage IV
TCGA-CJ-6030	TCGA-CJ-6030	2299	days	TCGA Kidney Clear Cell Carcinoma (KIRC)	kidney clear cell carcinoma	Kidney					65				-24096		2299	0				0				40745	MALE	Low	Kidney Clear Cell Renal Carcinoma	No	C64.9	8310/3	C64.9	YES				Left	11	G3		0		FALSE	Yes	M0	N0	T1a	Stage I
TCGA-CJ-6031	TCGA-CJ-6031	1906	days	TCGA Kidney Clear Cell Carcinoma (KIRC)	kidney clear cell carcinoma	Kidney					54				-19905			0	1906			0				40770	MALE	Normal	Kidney Clear Cell Renal Carcinoma	No	C64.9	8310/3	C64.9	YES			Normal	Right		G3				FALSE	No	M0	NX	T1b	Stage I
TCGA-CJ-6032	TCGA-CJ-6032	3639	days	TCGA Kidney Clear Cell Carcinoma (KIRC)	kidney clear cell carcinoma	Kidney					63				-23310			0	3639			0		Scheduled Follow-up Submission	Complete Remission/Response	42094	FEMALE	Normal	Kidney Clear Cell Renal Carcinoma	No	C64.9	8310/3	C64.9	YES			Normal	Right		G3	NO			FALSE	No	M0	NX	T2	Stage II
TCGA-CJ-6033	TCGA-CJ-6033	224	days	TCGA Kidney Clear Cell Carcinoma (KIRC)	kidney clear cell carcinoma	Kidney	YES	NO			54				-19919		224	0		144		2				40770	FEMALE	Low	Kidney Clear Cell Renal Carcinoma	No	C64.9	8310/3	C64.9	YES				Right		G4				FALSE	No	M1	N0	T3a	Stage IV
TCGA-CW-5580	TCGA-CW-5580	1964	days	TCGA Kidney Clear Cell Carcinoma (KIRC)	kidney clear cell carcinoma	Kidney	YES	YES	NO	NO	73				-26696		1964	0				1				40603	FEMALE		Kidney Clear Cell Renal Carcinoma	No	C64.9	8310/3	C64.9	YES				Right		G3				FALSE	No	M1	NX	T3a	Stage IV
TCGA-CW-5581	TCGA-CW-5581	2799	days	TCGA Kidney Clear Cell Carcinoma (KIRC)	kidney clear cell carcinoma	Kidney					44				-16195			0	2799			0				40689	MALE		Kidney Clear Cell Renal Carcinoma	No	C64.9	8310/3	C64.9	YES				Right		G3				FALSE	No	M0	NX	T1b	Stage I
TCGA-CW-5583	TCGA-CW-5583	2489	days	TCGA Kidney Clear Cell Carcinoma (KIRC)	kidney clear cell carcinoma	Kidney					51				-18666			0	2489			2				40689	FEMALE		Kidney Clear Cell Renal Carcinoma	No	C64.9	8310/3	C64.9	YES				Right		G2				FALSE	No	M0	NX	T1a	Stage I
TCGA-CW-5584	TCGA-CW-5584	164	days	TCGA Kidney Clear Cell Carcinoma (KIRC)	kidney clear cell carcinoma	Kidney	NO	NO		NO	74				-27352		164	0		102		0				40603	MALE		Kidney Clear Cell Renal Carcinoma	No	C64.9	8310/3	C64.9	YES				Right	2	G3		2		FALSE	No	M0	N1	T3b	Stage III
TCGA-CW-5585	TCGA-CW-5585	2609	days	TCGA Kidney Clear Cell Carcinoma (KIRC)	kidney clear cell carcinoma	Kidney	YES	NO	NO	NO	51				-18898			0	2609			0				40603	MALE		Kidney Clear Cell Renal Carcinoma	No	C64.9	8310/3	C64.9	YES				Right	17	G2		0		FALSE	No	M1	N0	T3b	Stage IV
TCGA-CW-5587	TCGA-CW-5587	2226	days	TCGA Kidney Clear Cell Carcinoma (KIRC)	kidney clear cell carcinoma	Kidney	NO	NO	YES	NO	62		2219		-22693			0	2226	2003		1				40603	FEMALE		Kidney Clear Cell Renal Carcinoma	No	C64.9	8310/3	C64.9	YES				Left	8	G2		0		FALSE	No	M0	N0	T3b	Stage III
TCGA-CW-5588	TCGA-CW-5588	2017	days	TCGA Kidney Clear Cell Carcinoma (KIRC)	kidney clear cell carcinoma	Kidney	NO	NO	NO	NO	78				-28714			0	2017			0				40603	FEMALE		Kidney Clear Cell Renal Carcinoma	No	C64.9	8310/3	C64.9	YES				Right		G2				FALSE	No	M0	NX	T1a	Stage I
TCGA-CW-5589	TCGA-CW-5589	2378	days	TCGA Kidney Clear Cell Carcinoma (KIRC)	kidney clear cell carcinoma	Kidney			NO	NO	52				-19312			0	2378			0				40603	MALE		Kidney Clear Cell Renal Carcinoma	No	C64.9	8310/3	C64.9	YES				Left		G2				FALSE	No	M0	NX	T1a	Stage I
TCGA-CW-5590	TCGA-CW-5590	1075	days	TCGA Kidney Clear Cell Carcinoma (KIRC)	kidney clear cell carcinoma	Kidney	YES	NO	NO	NO	51				-18905		1075	0		672		1				40603	MALE		Kidney Clear Cell Renal Carcinoma	No	C64.9	8310/3	C64.9	YES				Right		G3				FALSE	No	M1	NX	T3a	Stage IV
TCGA-CW-5591	TCGA-CW-5591	2271	days	TCGA Kidney Clear Cell Carcinoma (KIRC)	kidney clear cell carcinoma	Kidney	YES	YES	NO	YES	56			0	-20712			0	2271			0				40603	MALE		Kidney Clear Cell Renal Carcinoma	No	C64.9	8310/3	C64.9	YES				Right	2	G2		0		FALSE	No	M1	N0	T3a	Stage IV
TCGA-CW-6087	TCGA-CW-6087	41	days	TCGA Kidney Clear Cell Carcinoma (KIRC)	kidney clear cell carcinoma	Kidney					61				-22438		41	0				1				40688	MALE		Kidney Clear Cell Renal Carcinoma	No	C64.9	8310/3	C64.9	YES				Right	2	G4		1		FALSE	No	M1	N1	T3a	Stage IV
TCGA-CW-6088	TCGA-CW-6088	3222	days	TCGA Kidney Clear Cell Carcinoma (KIRC)	kidney clear cell carcinoma	Kidney					60				-22020			0	3222			1		Scheduled Follow-up Submission	Stable Disease	41192	MALE		Kidney Clear Cell Renal Carcinoma	No	C64.9	8310/3	C64.9	YES				Right	10	G2	NO	0		FALSE	No	M0	N0	T1b	Stage I
TCGA-CW-6090	TCGA-CW-6090	2552	days	TCGA Kidney Clear Cell Carcinoma (KIRC)	kidney clear cell carcinoma	Kidney					68				-24909			0	2552	2780		2				40688	MALE		Kidney Clear Cell Renal Carcinoma	No	C64.9	8310/3	C64.9	YES				Right		G3				FALSE	No	M0	NX	T1b	Stage I
TCGA-CW-6093	TCGA-CW-6093	3146	days	TCGA Kidney Clear Cell Carcinoma (KIRC)	kidney clear cell carcinoma	Kidney					73				-26909			0	3146			2		Scheduled Follow-up Submission	Stable Disease	41192	MALE		Kidney Clear Cell Renal Carcinoma	No	C64.9	8310/3	C64.9	YES				Right		G1				FALSE	Yes	M0	NX	T1a	Stage I
TCGA-CW-6097	TCGA-CW-6097	571	days	TCGA Kidney Clear Cell Carcinoma (KIRC)	kidney clear cell carcinoma	Kidney					32				-11701		571	0		457		0				40689	MALE		Kidney Clear Cell Renal Carcinoma	No	C64.9	8310/3	C64.9	YES				Left		G4				FALSE	No	M0	NX	T3a	Stage III
TCGA-CZ-4853	TCGA-CZ-4853	774	days	TCGA Kidney Clear Cell Carcinoma (KIRC)	kidney clear cell carcinoma	Kidney					82				-30191			0	774					Scheduled Follow-up Submission		40744	MALE	Low	Kidney Clear Cell Renal Carcinoma	No	C64.9	8310/3	C64.9	YES				Right		G2				FALSE	No	M0	NX	T1a	Stage I
TCGA-CZ-4854	TCGA-CZ-4854	1404	days	TCGA Kidney Clear Cell Carcinoma (KIRC)	kidney clear cell carcinoma	Kidney					68				-24876		1404	0				0				40585	MALE	Low	Kidney Clear Cell Renal Carcinoma	No	C64.9	8310/3	C64.9	YES		100		Right	2	G2		0		FALSE	Yes	M0	N0	T1b	Stage I
TCGA-CZ-4856	TCGA-CZ-4856	18	days	TCGA Kidney Clear Cell Carcinoma (KIRC)	kidney clear cell carcinoma	Kidney					62				-22684			0	18			0		Scheduled Follow-up Submission		40744	FEMALE	Normal	Kidney Clear Cell Renal Carcinoma	No	C64.9	8310/3	C64.9	YES		90		Left	4	G2		0		FALSE	Yes	M0	N0	T1b	Stage I
TCGA-CZ-4857	TCGA-CZ-4857	1432	days	TCGA Kidney Clear Cell Carcinoma (KIRC)	kidney clear cell carcinoma	Kidney	NO	YES	NO	NO	56				-20718		1432	0		990		0				40606	MALE	Low	Kidney Clear Cell Renal Carcinoma	No	C64.9	8310/3	C64.9	YES				Right	3	G3		0		FALSE	No	M1	N0	T3a	Stage IV
TCGA-CZ-4858	TCGA-CZ-4858	2105	days	TCGA Kidney Clear Cell Carcinoma (KIRC)	kidney clear cell carcinoma	Kidney	NO	NO	NO	YES	39			1912	-14343		2105	0	1943	1912		0		Scheduled Follow-up Submission		40744	MALE	Normal	Kidney Clear Cell Renal Carcinoma	No	C64.9	8310/3	C64.9	YES		100		Left		G4				FALSE	No	M0	NX	T2	Stage II
TCGA-CZ-4859	TCGA-CZ-4859	1787	days	TCGA Kidney Clear Cell Carcinoma (KIRC)	kidney clear cell carcinoma	Kidney					59				-21842			0	1787					Scheduled Follow-up Submission		40744	FEMALE	Normal	Kidney Clear Cell Renal Carcinoma	No	C64.9	8310/3	C64.9	YES				Right		G2				FALSE	No	M0	N0	T1	Stage I
TCGA-CZ-4860	TCGA-CZ-4860	206	days	TCGA Kidney Clear Cell Carcinoma (KIRC)	kidney clear cell carcinoma	Kidney	YES	NO	NO	NO	60				-22115		206	0				0				40588	MALE	Low	Kidney Clear Cell Renal Carcinoma	No	C64.9	8310/3	C64.9	YES		100		Right		G4				FALSE	No	M1	NX	T4	Stage IV
TCGA-CZ-4861	TCGA-CZ-4861	446	days	TCGA Kidney Clear Cell Carcinoma (KIRC)	kidney clear cell carcinoma	Kidney	NO	NO	NO	NO	63				-23053		446	0				0				40588	MALE	Normal	Kidney Clear Cell Renal Carcinoma	Yes	C64.9	8310/3	C64.9	YES		100		Left		G2				FALSE	No	M0	NX	T2	Stage II
TCGA-CZ-4862	TCGA-CZ-4862	3271	days	TCGA Kidney Clear Cell Carcinoma (KIRC)	kidney clear cell carcinoma	Kidney					46				-17077			0	3271			0		Scheduled Follow-up Submission		42088	MALE	Normal	Kidney Clear Cell Renal Carcinoma	No	C64.9	8310/3	C64.9	YES		100		Left		G2	NO			FALSE	Yes	M0	NX	T1b	Stage I
TCGA-CZ-4863	TCGA-CZ-4863	1928	days	TCGA Kidney Clear Cell Carcinoma (KIRC)	kidney clear cell carcinoma	Kidney	NO	NO	NO	NO	51				-18730			0	1928			0		Scheduled Follow-up Submission		40744	FEMALE	Low	Kidney Clear Cell Renal Carcinoma	No	C64.9	8310/3	C64.9	YES				Left	11	G3		0		FALSE	No	M0	N0	T3b	Stage III
TCGA-CZ-4864	TCGA-CZ-4864	2830	days	TCGA Kidney Clear Cell Carcinoma (KIRC)	kidney clear cell carcinoma	Kidney	NO	NO	NO	NO	86				-31557		2830	0	2830							40588	MALE	Low	Kidney Clear Cell Renal Carcinoma	No	C64.9	8310/3	C64.9	YES				Left		G3				FALSE	No	M0	N0	T2	Stage II
TCGA-CZ-4865	TCGA-CZ-4865	166	days	TCGA Kidney Clear Cell Carcinoma (KIRC)	kidney clear cell carcinoma	Kidney	NO	NO	NO	NO	70				-25709		166	0								40588	FEMALE	Normal	Kidney Clear Cell Renal Carcinoma	Yes	C64.9	8310/3	C64.9	YES				Left		G2				FALSE	Yes	M0	NX	T1a	Stage I
TCGA-CZ-4866	TCGA-CZ-4866	3267	days	TCGA Kidney Clear Cell Carcinoma (KIRC)	kidney clear cell carcinoma	Kidney					79				-28878			0	3267			0		Scheduled Follow-up Submission		42088	FEMALE	Normal	Kidney Clear Cell Renal Carcinoma	No	C64.9	8310/3	C64.9	YES				Right		G3	NO			FALSE	No	M0	NX	T1	Stage I
TCGA-CZ-5451	TCGA-CZ-5451	1929	days	TCGA Kidney Clear Cell Carcinoma (KIRC)	kidney clear cell carcinoma	Kidney					74				-27312			0	1929			0		Scheduled Follow-up Submission		40861	MALE	Low	Kidney Clear Cell Renal Carcinoma	No	C64.9	8310/3	C64.9	YES				Left	13	G3		0		FALSE	No	M0	N0	T2	Stage II
TCGA-CZ-5452	TCGA-CZ-5452	1789	days	TCGA Kidney Clear Cell Carcinoma (KIRC)	kidney clear cell carcinoma	Kidney					69				-25486			0	1789			0		Scheduled Follow-up Submission		40861	MALE	Normal	Kidney Clear Cell Renal Carcinoma	No	C64.9	8310/3	C64.9	YES				Right	5	G2		0		FALSE	No	M0	N0	T2	Stage II
TCGA-CZ-5453	TCGA-CZ-5453	2419	days	TCGA Kidney Clear Cell Carcinoma (KIRC)	kidney clear cell carcinoma	Kidney					67				-24640		2419	0	25					Scheduled Follow-up Submission		42088	MALE	Low	Kidney Clear Cell Renal Carcinoma	No	C64.9	8310/3	C64.9	YES				Left		G2				FALSE	No	M0	NX	T2	Stage II
TCGA-CZ-5454	TCGA-CZ-5454	722	days	TCGA Kidney Clear Cell Carcinoma (KIRC)	kidney clear cell carcinoma	Kidney	YES	NO	NO	YES	63			28	-23083		722	0		423		1				40612	MALE	Low	Kidney Clear Cell Renal Carcinoma	No	C64.9	8310/3	C64.9	YES				Right	3	G2		0		FALSE	No	M1	N0	T2	Stage IV
TCGA-CZ-5455	TCGA-CZ-5455	561	days	TCGA Kidney Clear Cell Carcinoma (KIRC)	kidney clear cell carcinoma	Kidney					63				-23150		561	0				1				40612	MALE	Low	Kidney Clear Cell Renal Carcinoma	No	C64.9	8310/3	C64.9	YES				Right		G4				FALSE	No	M1	NX	T3b	Stage IV
TCGA-CZ-5456	TCGA-CZ-5456	2422	days	TCGA Kidney Clear Cell Carcinoma (KIRC)	kidney clear cell carcinoma	Kidney					57				-21164			0	2422			1		Scheduled Follow-up Submission		42088	MALE	Low	Kidney Clear Cell Renal Carcinoma	No	C64.9	8310/3	C64.9	YES		90		Left	7	G3		0		FALSE	No	M0	N0	T2	Stage II
TCGA-CZ-5457	TCGA-CZ-5457	2754	days	TCGA Kidney Clear Cell Carcinoma (KIRC)	kidney clear cell carcinoma	Kidney				NO	62				-22763			0	2754	174				Scheduled Follow-up Submission	Progressive Disease	41900	MALE	Low	Kidney Clear Cell Renal Carcinoma	No	C64.9	8310/3	C64.9	YES		100		Right		G4	YES			FALSE	No	M0	NX	T3a	Stage III
TCGA-CZ-5458	TCGA-CZ-5458	2789	days	TCGA Kidney Clear Cell Carcinoma (KIRC)	kidney clear cell carcinoma	Kidney					43				-15790			0	2789					Scheduled Follow-up Submission	Complete Remission/Response	41900	MALE	Low	Kidney Clear Cell Renal Carcinoma	No	C64.9	8310/3	C64.9	YES				Right		G3	NO			FALSE	No	M0	NX	T3a	Stage III
TCGA-CZ-5459	TCGA-CZ-5459	1683	days	TCGA Kidney Clear Cell Carcinoma (KIRC)	kidney clear cell carcinoma	Kidney	NO	NO	NO	NO	63				-23318			0	1683			0		Scheduled Follow-up Submission		40861	MALE	Low	Kidney Clear Cell Renal Carcinoma	No	C64.9	8310/3	C64.9	YES				Right		G3				FALSE	No	M0	NX	T3b	Stage III
TCGA-CZ-5460	TCGA-CZ-5460	2873	days	TCGA Kidney Clear Cell Carcinoma (KIRC)	kidney clear cell carcinoma	Kidney					55				-20392			0	2873					Scheduled Follow-up Submission		42088	MALE	Low	Kidney Clear Cell Renal Carcinoma	No	C64.9	8310/3	C64.9	YES				Right		G2	NO			FALSE	No	M1	NX	T3b	Stage IV
TCGA-CZ-5461	TCGA-CZ-5461	330	days	TCGA Kidney Clear Cell Carcinoma (KIRC)	kidney clear cell carcinoma	Kidney	YES	YES	NO	YES	52			52	-19030		330	0	330	48						40613	MALE	Low	Kidney Clear Cell Renal Carcinoma	No	C64.9	8310/3	C64.9	YES				Right		G4				FALSE	No	M1	NX	T1b	Stage IV
TCGA-CZ-5462	TCGA-CZ-5462	311	days	TCGA Kidney Clear Cell Carcinoma (KIRC)	kidney clear cell carcinoma	Kidney					83				-30659		311	0								40613	MALE	Low	Kidney Clear Cell Renal Carcinoma	No	C64.9	8310/3	C64.9	YES				Right		G3				FALSE	No	M1	NX	T1b	Stage IV
TCGA-CZ-5463	TCGA-CZ-5463	662	days	TCGA Kidney Clear Cell Carcinoma (KIRC)	kidney clear cell carcinoma	Kidney					76				-27911			0	662					Scheduled Follow-up Submission		40861	MALE		Kidney Clear Cell Renal Carcinoma	No	C64.9	8310/3	C64.9	YES				Left		G2				FALSE	No	M0	NX	T2	Stage II
TCGA-CZ-5464	TCGA-CZ-5464	2128	days	TCGA Kidney Clear Cell Carcinoma (KIRC)	kidney clear cell carcinoma	Kidney					69				-25463			0	2128			0		Scheduled Follow-up Submission	Complete Remission/Response	41900	MALE	Low	Kidney Clear Cell Renal Carcinoma	No	C64.9	8310/3	C64.9	YES				Left		G2	NO			FALSE	No	M1	NX	T3b	Stage IV
TCGA-CZ-5465	TCGA-CZ-5465	2564	days	TCGA Kidney Clear Cell Carcinoma (KIRC)	kidney clear cell carcinoma	Kidney					76				-27838		2564	0	1377			0		Scheduled Follow-up Submission		42088	FEMALE	Low	Kidney Clear Cell Renal Carcinoma	No	C64.9	8310/3	C64.9	YES		100		Left		G2				FALSE	No	M0	NX	T3b	Stage III
TCGA-CZ-5466	TCGA-CZ-5466	685	days	TCGA Kidney Clear Cell Carcinoma (KIRC)	kidney clear cell carcinoma	Kidney					67				-24669			0	685			0				40613	MALE	Low	Kidney Clear Cell Renal Carcinoma	No	C64.9	8310/3	C64.9	YES				Right		G2				FALSE	No	M0	NX	T3a	Stage III
TCGA-CZ-5467	TCGA-CZ-5467	73	days	TCGA Kidney Clear Cell Carcinoma (KIRC)	kidney clear cell carcinoma	Kidney	NO	NO	NO	NO	86				-31473		73	0		62						40613	FEMALE	Low	Kidney Clear Cell Renal Carcinoma	No	C64.9	8310/3	C64.9	YES				Right	2	G4		0		FALSE	No	M0	N0	T3a	Stage III
TCGA-CZ-5468	TCGA-CZ-5468	59	days	TCGA Kidney Clear Cell Carcinoma (KIRC)	kidney clear cell carcinoma	Kidney	NO	NO	NO	NO	84				-30729		59	0	59							40613	MALE	Low	Kidney Clear Cell Renal Carcinoma	No	C64.9	8310/3	C64.9	YES				Left		G4				FALSE	No	M1	NX	T3b	Stage IV
TCGA-CZ-5469	TCGA-CZ-5469	946	days	TCGA Kidney Clear Cell Carcinoma (KIRC)	kidney clear cell carcinoma	Kidney	YES	YES	NO	NO	41				-15242		946	0		110		0				40613	MALE	Low	Kidney Clear Cell Renal Carcinoma	No	C64.9	8310/3	C64.9	YES		90		Left	16	G2		0		FALSE	No	M0	N0	T2	Stage II
TCGA-CZ-5470	TCGA-CZ-5470	386	days	TCGA Kidney Clear Cell Carcinoma (KIRC)	kidney clear cell carcinoma	Kidney					72				-26494			0	386					Scheduled Follow-up Submission		40861	FEMALE	Low	Kidney Clear Cell Renal Carcinoma	No	C64.9	8310/3	C64.9	YES				Left	2	G3		0		FALSE	No	M0	N0	T2	Stage II
TCGA-CZ-5982	TCGA-CZ-5982	2439	days	TCGA Kidney Clear Cell Carcinoma (KIRC)	kidney clear cell carcinoma	Kidney					59				-21592			0	2439			0		Scheduled Follow-up Submission		40949	FEMALE		Kidney Clear Cell Renal Carcinoma	No	C64.9	8310/3	C64.9	YES		100		Left		G2				FALSE	No	M0	NX	T1a	Stage I
TCGA-CZ-5984	TCGA-CZ-5984	2067	days	TCGA Kidney Clear Cell Carcinoma (KIRC)	kidney clear cell carcinoma	Kidney					51				-18775			0	2067			0		Scheduled Follow-up Submission		40949	MALE	Low	Kidney Clear Cell Renal Carcinoma	No	C64.9	8310/3	C64.9	YES				Left		G3				FALSE	No	M0	N0	T1b	Stage I
TCGA-CZ-5985	TCGA-CZ-5985	1997	days	TCGA Kidney Clear Cell Carcinoma (KIRC)	kidney clear cell carcinoma	Kidney					58				-21242			0	1997			0		Scheduled Follow-up Submission		40949	MALE	Low	Kidney Clear Cell Renal Carcinoma	No	C64.9	8310/3	C64.9	YES				Right	5	G2		0		FALSE	No	M0	N0	T2	Stage II
TCGA-CZ-5986	TCGA-CZ-5986	373	days	TCGA Kidney Clear Cell Carcinoma (KIRC)	kidney clear cell carcinoma	Kidney					61				-22456			0	373			0		Scheduled Follow-up Submission		40949	MALE	Low	Kidney Clear Cell Renal Carcinoma	No	C64.9	8310/3	C64.9	YES				Left	4	G3		0		FALSE	No	M0	N0	T1	Stage I
TCGA-CZ-5987	TCGA-CZ-5987	445	days	TCGA Kidney Clear Cell Carcinoma (KIRC)	kidney clear cell carcinoma	Kidney	NO	YES		YES	60			377	-21928		445	0		377						40667	MALE	Low	Kidney Clear Cell Renal Carcinoma	No	C64.9	8310/3	C64.9	YES				Right		G2				FALSE	No	M1	NX	T3b	Stage IV
TCGA-CZ-5988	TCGA-CZ-5988	693	days	TCGA Kidney Clear Cell Carcinoma (KIRC)	kidney clear cell carcinoma	Kidney					38				-14131			0	693			0		Scheduled Follow-up Submission		40949	MALE	Low	Kidney Clear Cell Renal Carcinoma	No	C64.9	8310/3	C64.9	YES				Right		G2				FALSE	No	M0	N0	T1b	Stage I
TCGA-CZ-5989	TCGA-CZ-5989	1905	days	TCGA Kidney Clear Cell Carcinoma (KIRC)	kidney clear cell carcinoma	Kidney					60				-22170			0	1905			0		Scheduled Follow-up Submission		40952	MALE	Low	Kidney Clear Cell Renal Carcinoma	No	C64.9	8310/3	C64.9	YES				Right	1	G2		0		FALSE	No	M0	N0	T2	Stage II
TCGA-DV-5565	TCGA-DV-5565	1329	days	TCGA Kidney Clear Cell Carcinoma (KIRC)	kidney clear cell carcinoma	Kidney					59				-21642			0	1329			0		Scheduled Follow-up Submission		40742	MALE	Normal	Kidney Clear Cell Renal Carcinoma	No	C64.9	8310/3	C64.9	YES		100	Elevated	Right		G2				FALSE	Yes	M0	NX	T1a	Stage I
TCGA-DV-5566	TCGA-DV-5566	1398	days	TCGA Kidney Clear Cell Carcinoma (KIRC)	kidney clear cell carcinoma	Kidney					67				-24717			0	1398			0				40632	FEMALE	Normal	Kidney Clear Cell Renal Carcinoma	No	C64.9	8310/3	C64.9	YES		100	Normal	Right		G2				FALSE	Yes	M0	NX	T1a	Stage I
TCGA-DV-5567	TCGA-DV-5567	2004	days	TCGA Kidney Clear Cell Carcinoma (KIRC)	kidney clear cell carcinoma	Kidney			NO	NO	40				-14642			0	2004	2004		1		Scheduled Follow-up Submission		41841	FEMALE	Low	Kidney Clear Cell Renal Carcinoma	No	C64.9	8310/3	C64.9	YES		90	Normal	Right		G2				FALSE	Yes	M0	NX	T1a	Stage I
TCGA-DV-5568	TCGA-DV-5568	370	days	TCGA Kidney Clear Cell Carcinoma (KIRC)	kidney clear cell carcinoma	Kidney					26				-9714			0	370			0				40631	MALE	Low	Kidney Clear Cell Renal Carcinoma	Yes	C64.9	8310/3	C64.9	YES		100	Normal	Right		G2				FALSE	Yes	M0	NX	T1a	Stage I
TCGA-DV-5569	TCGA-DV-5569	355	days	TCGA Kidney Clear Cell Carcinoma (KIRC)	kidney clear cell carcinoma	Kidney					29				-10698			0	355			1				40630	FEMALE	Low	Kidney Clear Cell Renal Carcinoma	No	C64.9	8310/3	C64.9	YES		90	Elevated	Right		G2				FALSE	Yes	M0	NX	T1a	Stage I
TCGA-DV-5573	TCGA-DV-5573	1130	days	TCGA Kidney Clear Cell Carcinoma (KIRC)	kidney clear cell carcinoma	Kidney					41				-15264			0	1130			0				40631	MALE	Low	Kidney Clear Cell Renal Carcinoma	Yes	C64.9	8310/3	C64.9	YES		100	Normal	Right		G2				FALSE	Yes	M0	NX	T1a	Stage I
TCGA-DV-5574	TCGA-DV-5574	2016	days	TCGA Kidney Clear Cell Carcinoma (KIRC)	kidney clear cell carcinoma	Kidney	NO	NO	YES	NO	37		1646		-13517			0	2016	357		0		Scheduled Follow-up Submission	Complete Remission/Response	41899	MALE	Low	Kidney Clear Cell Renal Carcinoma	No	C64.9	8310/3	C64.9	YES		100	Normal	Right		G2	YES			FALSE	Yes	M0	NX	T1a	Stage I
TCGA-DV-5575	TCGA-DV-5575	1006	days	TCGA Kidney Clear Cell Carcinoma (KIRC)	kidney clear cell carcinoma	Kidney					52				-19022			0	1006			0				40630	FEMALE	Low	Kidney Clear Cell Renal Carcinoma	No	C64.9	8310/3	C64.9	YES		100	Normal	Left		G2				FALSE	No	M0	NX	T1a	Stage I
TCGA-DV-5576	TCGA-DV-5576	727	days	TCGA Kidney Clear Cell Carcinoma (KIRC)	kidney clear cell carcinoma	Kidney					55				-20310		727	0				0				40626	FEMALE	Low	Kidney Clear Cell Renal Carcinoma	No	C64.9	8310/3	C64.9	YES		100	Normal	Left		G2				FALSE	Yes	M0	NX	T1a	Stage I
TCGA-EU-5904	TCGA-EU-5904	551	days	TCGA Kidney Clear Cell Carcinoma (KIRC)	kidney clear cell carcinoma	Kidney					47				-17468			0	551			1				40686	FEMALE	Normal	Kidney Clear Cell Renal Carcinoma	No	C64.9	8310/3	C64.9	YES		90		Right		G1				FALSE	No	M0	NX	T1	Stage I
TCGA-EU-5905	TCGA-EU-5905	119	days	TCGA Kidney Clear Cell Carcinoma (KIRC)	kidney clear cell carcinoma	Kidney					67				-24475			0	119			0				40683	FEMALE	Elevated	Kidney Clear Cell Renal Carcinoma	No	C64.9	8310/3	C64.9	YES		100		Right		G3				FALSE	No	M0	NX	T1	Stage I
TCGA-EU-5906	TCGA-EU-5906	206	days	TCGA Kidney Clear Cell Carcinoma (KIRC)	kidney clear cell carcinoma	Kidney					55				-20246			0	206			1				40686	MALE	Normal	Kidney Clear Cell Renal Carcinoma	No	C64.9	8310/3	C64.9	YES		90		Left		G2				FALSE	No	M0	NX	T1b	Stage I
TCGA-EU-5907	TCGA-EU-5907	127	days	TCGA Kidney Clear Cell Carcinoma (KIRC)	kidney clear cell carcinoma	Kidney				NO	81				-29863			0	127			0				40683	MALE	Normal	Kidney Clear Cell Renal Carcinoma	No	C64.9	8310/3	C64.9	YES		100		Right		G3				FALSE	No	M0	NX	T3a	Stage III
[truncated: 22 more columns]
